# Supplementary material for: Genetic Variants in Epigenetic Pathways and Risks of Multiple Cancers in the GAME-ON Consortium
Source: Oxford University Press journal article supplement (doi:10.1158/1055-9965.epi-16-0728), 2017-01-23
Supplement: 10559965epi160728-sup-170119_1_supp_3765715_dhdkmy.docx [file 10559965epi160728-sup-170119_1_supp_3765715_dhdkmy.docx]

| Name of software/database | Reference |
| --- | --- |
| GO - Gene Ontology | Ashburner M, Ball CA, Blake JA, Botstein D, Butler H, Cherry JM, et al. Gene ontology: tool for the unification of biology. The Gene Ontology Consortium. Nature genetics 2000;25(1):25-9. |
| GeneCards | afran M, Dalah I, Alexander J, Rosen N, Iny Stein T, Shmoish M, et al. GeneCards Version 3: the human gene integrator. Database : the journal of biological databases and curation 2010;2010:baq020. |
| Homo.sapiens annotation package, version 1.1.2 | Bioconductor Core Team. Homo.sapiens: Annotation package for the Homo.sapiens object. R package version 1.1.2. . |
| SNPlocs.Hsapiens.dbSNP144.GRCh37 | Pages H.SNPlocs.Hsapiens.dbSNP144.GRCh37 : SNP locations for Homo sapiens (dbSNP Build 144), R package version 0.99.11 |
| R, version 3.2.5 | R Core Team. R: A Language and Environment for Statistical Computing. Vienna, Austria: R Foundation for Statistical Computing; 2014. |
| Haploview 4.2 | Barrett JC, Fry B, Maller J, Daly MJ. Haploview: analysis and visualization of LD and haplotype maps. Bioinformatics 2005;21(2):263-5. |
| ALIGATOR | Holmans P, Green EK, Pahwa JS, Ferreira MAR, Purcell SM, Sklar P, et al. Gene Ontology Analysis of GWA Study Data Sets Provides Insights into the Biology of Bipolar Disorder. Am J Hum Genet 2009;85(1):13-24. |
| SNPath R package | Chen LS, Hutter CM, Potter JD, Liu Y, Prentice RL, Peters U, et al. Insights into Colon Cancer Etiology via a Regularized Approach to Gene Set Analysis of GWAS Data. Am J Hum Genet 2010;86(6):860-71. |
| FunciSNP R/Bioconductor package | Coetzee SG, Rhie SK, Berman BP, Coetzee GA, Noushmehr H. FunciSNP: an R/bioconductor tool integrating functional non-coding data sets with genetic association studies to identify candidate regulatory SNPs. Nucleic acids research 2012;40(18):e139. |
| RegulomeDB, version 1.1 | Boyle AP, Hong EL, Hariharan M, Cheng Y, Schaub MA, Kasowski M, et al. Annotation of functional variation in personal genomes using RegulomeDB. Genome research 2012;22(9):1790-7. |

Supplementary Table S2: List of used software and databases
