# Supplementary material for: Genetic Variants in Epigenetic Pathways and Risks of Multiple Cancers in the GAME-ON Consortium
Source: Oxford University Press journal article supplement (doi:10.1158/1055-9965.epi-16-0728), 2017-01-23
Supplement: 10559965epi160728-sup-170119_1_supp_3765718_zhzkmy.xlsx [file 10559965epi160728-sup-170119_1_supp_3765718_zhzkmy.xlsx]

## Sheet: Sheet1
SNP	Selected gene	Combined p value	Direction specific p value	Direction specific OR	CI lower	CI upper	Cancer type	fdr q value	SNP location	Chromosome	Region start	Region end	Reference allele	Effect allele
rs10402468	BABAM1	1.14408e-05	2.24611e-06	1.126	1.072	1.183	Squamous cell lung cancer, ER-negative breast cancer, Serous ovarian cancer	0.00824244	17384003	19	17128232	17640162	C	A
rs10406920	BABAM1	1.90216e-05	4.19879e-06	1.124	1.069	1.181	Squamous cell lung cancer, ER-negative breast cancer, Serous ovarian cancer	0.0120555	17389648	19	17128232	17640162	C	T
rs10416654	BABAM1	1.58011e-05	5.5939e-06	1.125	1.069	1.184	Squamous cell lung cancer, ER-negative breast cancer, Serous ovarian cancer	0.0104925	17385176	19	17128232	17640162	T	C
rs10418154	BABAM1	1.73018e-05	6.90586e-06	1.125	1.069	1.184	Squamous cell lung cancer, ER-negative breast cancer, Serous ovarian cancer	0.0112503	17386006	19	17128232	17640162	A	G
rs10418362	BABAM1	8.16113e-05	6.90999e-05	1.119	1.059	1.183	Squamous cell lung cancer, ER-negative breast cancer, Serous ovarian cancer	0.0389157	17386107	19	17128232	17640162	A	T
rs10419397	BABAM1	3.43284e-09	2.74711e-10	1.14	1.094	1.187	Squamous cell lung cancer, ER-negative breast cancer, Serous ovarian cancer	3.58077e-06	17391328	19	17128232	17640162	G	A
rs10424198	BABAM1	1.24492e-08	1.66787e-09	1.139	1.092	1.189	Squamous cell lung cancer, ER-negative breast cancer, Serous ovarian cancer	1.26176e-05	17409671	19	17128232	17640162	C	T
rs10425939	BABAM1	1.21211e-05	2.85267e-06	1.125	1.071	1.182	Squamous cell lung cancer, ER-negative breast cancer, Serous ovarian cancer	0.00859768	17397244	19	17128232	17640162	C	T
rs10426697	BABAM1	2.11608e-05	3.1561e-06	1.126	1.071	1.184	Squamous cell lung cancer, ER-negative breast cancer, Serous ovarian cancer	0.0130158	17389156	19	17128232	17640162	C	T
rs111961716	BABAM1	7.54904e-09	1.36196e-09	1.139	1.092	1.188	Squamous cell lung cancer, ER-negative breast cancer, Serous ovarian cancer	7.74525e-06	17398085	19	17128232	17640162	C	A
rs112582668	BABAM1	1.88512e-05	4.15798e-06	1.124	1.069	1.181	Squamous cell lung cancer, ER-negative breast cancer, Serous ovarian cancer	0.0119778	17388923	19	17128232	17640162	C	T
rs113272353	BABAM1	1.29004e-05	2.61888e-06	1.125	1.071	1.182	Squamous cell lung cancer, ER-negative breast cancer, Serous ovarian cancer	0.00888867	17384651	19	17128232	17640162	C	T
rs113299211	BABAM1	1.71127e-08	5.546e-09	1.138	1.089	1.188	Squamous cell lung cancer, ER-negative breast cancer, Serous ovarian cancer	1.70678e-05	17400765	19	17128232	17640162	T	C
rs12974508	BABAM1	1.07249e-06	1.64909e-07	0.948	0.929	0.967	Squamous cell lung cancer, Overall breast cancer, ER-negative breast cancer, Overall ovarian cancer, Serous ovarian cancer, Overall prostate cancer	0.000945384	17401521	19	17128232	17640162	C	T
rs12982058	BABAM1	1.89501e-06	2.12286e-07	0.948	0.929	0.967	Squamous cell lung cancer, Overall breast cancer, ER-negative breast cancer, Overall ovarian cancer, Serous ovarian cancer, Overall prostate cancer	0.00158663	17409380	19	17128232	17640162	C	T
rs13343778	BABAM1	1.12717e-08	1.95606e-09	1.139	1.091	1.188	Squamous cell lung cancer, ER-negative breast cancer, Serous ovarian cancer	1.15175e-05	17407695	19	17128232	17640162	G	T
rs2363956	BABAM1	2.53097e-07	8.32543e-08	0.947	0.929	0.966	Squamous cell lung cancer, Overall breast cancer, ER-negative breast cancer, Overall ovarian cancer, Serous ovarian cancer, Overall prostate cancer	0.000241835	17394124	19	17128232	17640162	T	G
rs28473003	BABAM1	1.70781e-08	3.22383e-09	1.137	1.09	1.187	Squamous cell lung cancer, ER-negative breast cancer, Serous ovarian cancer	1.70678e-05	17406167	19	17128232	17640162	C	T
rs34084277	BABAM1	2.08892e-05	8.30907e-06	1.124	1.068	1.184	Squamous cell lung cancer, ER-negative breast cancer, Serous ovarian cancer	0.0129122	17387176	19	17128232	17640162	A	G
rs35604430	BABAM1	0.000103707	3.78819e-05	1.053	1.027	1.079	Squamous cell lung cancer, Overall breast cancer, ER-negative breast cancer, Overall ovarian cancer, Serous ovarian cancer	0.0461141	17382990	19	17128232	17640162	A	G
rs3745185	BABAM1	6.40051e-05	4.96321e-05	0.954	0.933	0.976	Squamous cell lung cancer, Overall breast cancer, ER-negative breast cancer, Overall ovarian cancer, Serous ovarian cancer, Overall prostate cancer	0.0319824	17384267	19	17128232	17640162	G	A
rs4808075	BABAM1	3.48215e-09	5.68433e-10	1.14	1.094	1.188	Squamous cell lung cancer, ER-negative breast cancer, Serous ovarian cancer	3.61713e-06	17390291	19	17128232	17640162	T	C
rs4808076	BABAM1	2.21565e-09	1.76594e-10	1.14	1.095	1.187	Squamous cell lung cancer, ER-negative breast cancer, Serous ovarian cancer	2.34038e-06	17395401	19	17128232	17640162	C	T
rs4808613	BABAM1	2.24622e-05	8.917e-06	1.124	1.068	1.184	Squamous cell lung cancer, ER-negative breast cancer, Serous ovarian cancer	0.0137824	17388065	19	17128232	17640162	T	C
rs4808616	BABAM1	1.50398e-08	2.73013e-09	1.138	1.09	1.187	Squamous cell lung cancer, ER-negative breast cancer, Serous ovarian cancer	1.51818e-05	17403033	19	17128232	17640162	C	A
rs55924783	BABAM1	1.646e-08	3.10532e-09	1.137	1.09	1.187	Squamous cell lung cancer, ER-negative breast cancer, Serous ovarian cancer	1.65487e-05	17404072	19	17128232	17640162	T	A
rs56028644	BABAM1	1.91888e-05	4.23431e-06	1.124	1.069	1.181	Squamous cell lung cancer, ER-negative breast cancer, Serous ovarian cancer	0.0121307	17388790	19	17128232	17640162	C	T
rs56069439	BABAM1	2.92269e-09	5.03446e-10	1.14	1.094	1.188	Squamous cell lung cancer, ER-negative breast cancer, Serous ovarian cancer	3.07426e-06	17393925	19	17128232	17640162	C	A
rs59997441	BABAM1	0.000105177	5.65904e-05	1.053	1.027	1.079	Squamous cell lung cancer, Overall breast cancer, ER-negative breast cancer, Overall ovarian cancer, Serous ovarian cancer	0.0465199	17381463	19	17128232	17640162	T	C
rs61494113	BABAM1	1.78873e-08	3.55153e-09	1.137	1.09	1.186	Squamous cell lung cancer, ER-negative breast cancer, Serous ovarian cancer	1.77696e-05	17401859	19	17128232	17640162	G	A
rs61634114	BABAM1	1.6201e-05	3.50421e-06	1.125	1.07	1.182	Squamous cell lung cancer, ER-negative breast cancer, Serous ovarian cancer	0.0106172	17387254	19	17128232	17640162	G	A
rs66753001	BABAM1	1.5619e-05	6.78432e-06	1.124	1.068	1.183	Squamous cell lung cancer, ER-negative breast cancer, Serous ovarian cancer	0.0104269	17394839	19	17128232	17640162	A	G
rs67397200	BABAM1	1.90561e-08	6.94522e-09	1.137	1.089	1.188	Squamous cell lung cancer, ER-negative breast cancer, Serous ovarian cancer	1.88559e-05	17401404	19	17128232	17640162	C	G
rs67412075	BABAM1	1.62991e-05	5.50087e-06	1.126	1.07	1.185	Squamous cell lung cancer, ER-negative breast cancer, Serous ovarian cancer	0.0106537	17385502	19	17128232	17640162	A	G
rs73509996	BABAM1	1.50111e-05	6.15386e-06	1.125	1.069	1.183	Squamous cell lung cancer, ER-negative breast cancer, Serous ovarian cancer	0.0100748	17393449	19	17128232	17640162	T	G
rs8100241	BABAM1	3.39128e-07	5.36005e-08	0.947	0.929	0.966	Squamous cell lung cancer, Overall breast cancer, ER-negative breast cancer, Overall ovarian cancer, Serous ovarian cancer, Overall prostate cancer	0.000316784	17392894	19	17128232	17640162	G	A
rs1800628	BAG6	1.3467e-05	1.24821e-06	1.116	1.067	1.166	Overall lung cancer, Squamous cell lung cancer, Colorectal cancer, Endometrioid ovarian cancer	0.00916131	31546850	6	31356805	31870477	G	A
rs3130063	BAG6	2.08352e-05	1.44193e-06	1.116	1.068	1.168	Overall lung cancer, Squamous cell lung cancer, Colorectal cancer	0.0129107	31558702	6	31356805	31870477	C	T
rs3130614	BAG6	9.93168e-06	1.00211e-06	1.116	1.068	1.167	Overall lung cancer, Squamous cell lung cancer, Colorectal cancer, Endometrioid ovarian cancer	0.00744887	31476458	6	31356805	31870477	T	A
rs3130923	BAG6	6.13215e-06	3.93905e-07	1.119	1.072	1.169	Overall lung cancer, Squamous cell lung cancer, Colorectal cancer	0.0047973	31462135	6	31356805	31870477	G	A
rs3131379	BAG6	1.57534e-07	1.40906e-08	1.123	1.079	1.168	Overall lung cancer, Squamous cell lung cancer, Colorectal cancer, Serous ovarian cancer	0.000152268	31721033	6	31356805	31870477	G	A
rs501942	BAG6	4.75249e-08	2.97183e-09	1.14	1.092	1.19	Overall lung cancer, Squamous cell lung cancer, Colorectal cancer	4.66568e-05	31840477	6	31356805	31870477	C	T
rs67682613	BAG6	4.60653e-05	1.30478e-05	1.096	1.052	1.141	Overall lung cancer, Squamous cell lung cancer, Colorectal cancer, Endometrioid ovarian cancer	0.0244843	31826705	6	31356805	31870477	G	A
rs56404467	BRCA2	4.96468e-05	3.26221e-05	1.303	1.15	1.477	Overall lung cancer, Squamous cell lung cancer, Colorectal cancer	0.0261656	32839990	13	32639617	33223809	G	A
rs12611084	DPF1	1.45333e-06	8.40471e-08	0.932	0.908	0.956	ER-negative breast cancer, Endometrioid ovarian cancer, Overall prostate cancer, Aggressive prostate cancer	0.00123332	38746272	19	38451649	38970317	A	C
rs8100395	DPF1	2.4713e-06	2.82653e-07	0.929	0.904	0.956	Endometrioid ovarian cancer, Overall prostate cancer, Aggressive prostate cancer	0.00206223	38747117	19	38451649	38970317	A	G
rs141910407	EHMT2	1.87363e-07	9.62886e-09	1.134	1.086	1.184	Overall lung cancer, Squamous cell lung cancer, Colorectal cancer, Serous ovarian cancer	0.000179712	32005267	6	31597537	32115464	C	T
rs3115672	EHMT2	1.49024e-07	1.29364e-08	1.123	1.079	1.169	Overall lung cancer, Squamous cell lung cancer, Colorectal cancer, Serous ovarian cancer	0.000144601	31727897	6	31597537	32115464	C	T
rs78914317	GATA2	9.9381e-06	6.51966e-07	0.892	0.852	0.933	Endometrioid ovarian cancer, Overall prostate cancer	0.00744887	127958013	3	127948265	128462030	G	A
rs13434079	GATA2	2.08142e-05	1.44037e-06	0.906	0.87	0.943	Colorectal cancer, Endometrioid ovarian cancer, Overall prostate cancer	0.0129107	127963448	3	127948265	128462030	A	G
rs10934853	GATA2	6.26137e-07	3.44329e-08	1.127	1.08	1.175	Endometrioid ovarian cancer, Overall prostate cancer	0.000565879	128038373	3	127948265	128462030	C	A
rs3849531	GATA2	3.73279e-06	2.29162e-07	1.136	1.082	1.192	Endometrioid ovarian cancer, Overall prostate cancer	0.00303401	128058617	3	127948265	128462030	A	T
rs190505819	HDAC9	4.04749e-05	2.94689e-06	1.881	1.443	2.451	Lung adenocarcinoma, Squamous cell lung cancer, Colorectal cancer, Clear cell ovarian cancer	0.0218846	18192722	7	17876572	18958466	T	C
rs12661188	L3MBTL3	5.91834e-05	4.4417e-06	1.054	1.03	1.077	Colorectal cancer, Overall breast cancer, ER-negative breast cancer, Clear cell ovarian cancer, Overall prostate cancer, Aggressive prostate cancer	0.030114	130378833	6	130089728	130712594	T	C
rs4339481	L3MBTL3	9.97725e-05	7.81987e-06	1.052	1.029	1.076	Colorectal cancer, Overall breast cancer, ER-negative breast cancer, Clear cell ovarian cancer, Overall prostate cancer, Aggressive prostate cancer	0.045294	130382653	6	130089728	130712594	A	T
rs4351283	L3MBTL3	3.89708e-05	2.82897e-06	1.051	1.029	1.073	Colorectal cancer, Overall breast cancer, ER-negative breast cancer, Clear cell ovarian cancer, Overall prostate cancer, Aggressive prostate cancer	0.021348	130374711	6	130089728	130712594	T	C
rs6569648	L3MBTL3	2.33061e-05	1.83071e-06	1.064	1.037	1.091	Overall breast cancer, ER-negative breast cancer, Clear cell ovarian cancer, Overall prostate cancer, Aggressive prostate cancer	0.0141271	130349119	6	130089728	130712594	C	T
rs6899976	L3MBTL3	1.82731e-05	1.2524e-06	1.056	1.033	1.079	Overall breast cancer, ER-negative breast cancer, Clear cell ovarian cancer, Overall prostate cancer, Aggressive prostate cancer	0.0117295	130358428	6	130089728	130712594	G	A
rs6900473	L3MBTL3	5.88161e-05	4.41192e-06	1.053	1.03	1.077	Colorectal cancer, Overall breast cancer, ER-negative breast cancer, Clear cell ovarian cancer, Overall prostate cancer, Aggressive prostate cancer	0.0299881	130375810	6	130089728	130712594	A	G
rs6914670	L3MBTL3	5.66201e-05	4.23412e-06	1.053	1.03	1.077	Colorectal cancer, Overall breast cancer, ER-negative breast cancer, Clear cell ovarian cancer, Overall prostate cancer, Aggressive prostate cancer	0.0291434	130372984	6	130089728	130712594	A	G
rs6926186	L3MBTL3	8.30831e-05	6.41206e-06	1.053	1.03	1.077	Overall breast cancer, ER-negative breast cancer, Clear cell ovarian cancer, Overall prostate cancer, Aggressive prostate cancer	0.0392438	130350294	6	130089728	130712594	G	A
rs9375694	L3MBTL3	2.61478e-05	1.8407e-06	1.055	1.032	1.078	Overall breast cancer, ER-negative breast cancer, Clear cell ovarian cancer, Overall prostate cancer, Aggressive prostate cancer	0.0156976	130356608	6	130089728	130712594	G	A
rs9375695	L3MBTL3	1.9982e-05	1.3786e-06	1.055	1.033	1.079	Overall breast cancer, ER-negative breast cancer, Clear cell ovarian cancer, Overall prostate cancer, Aggressive prostate cancer	0.0125372	130358944	6	130089728	130712594	G	T
rs9388766	L3MBTL3	1.57835e-05	1.07024e-06	1.055	1.033	1.078	Colorectal cancer, Overall breast cancer, ER-negative breast cancer, Clear cell ovarian cancer, Overall prostate cancer, Aggressive prostate cancer	0.0104925	130354855	6	130089728	130712594	T	C
rs9388767	L3MBTL3	2.02416e-05	1.39784e-06	1.055	1.033	1.079	Overall breast cancer, ER-negative breast cancer, Clear cell ovarian cancer, Overall prostate cancer, Aggressive prostate cancer	0.0126367	130357553	6	130089728	130712594	G	A
rs9388770	L3MBTL3	0.000102691	8.06836e-06	1.052	1.029	1.076	Colorectal cancer, Overall breast cancer, ER-negative breast cancer, Clear cell ovarian cancer, Overall prostate cancer, Aggressive prostate cancer	0.0459475	130380877	6	130089728	130712594	A	T
rs9402211	L3MBTL3	1.76286e-05	1.20504e-06	1.055	1.032	1.078	Colorectal cancer, Overall breast cancer, ER-negative breast cancer, Clear cell ovarian cancer, Overall prostate cancer, Aggressive prostate cancer	0.0113804	130353612	6	130089728	130712594	T	C
rs13256300	LOXL2	1.29536e-05	8.6591e-07	0.897	0.859	0.937	Endometrioid ovarian cancer, Clear cell ovarian cancer, Overall prostate cancer	0.00888867	23502588	8	22904410	23511722	T	C
rs13256366	LOXL2	1.26662e-05	8.45343e-07	0.896	0.858	0.936	Endometrioid ovarian cancer, Clear cell ovarian cancer, Overall prostate cancer	0.0088841	23502660	8	22904410	23511722	T	C
rs13261460	LOXL2	2.08073e-05	1.43985e-06	0.896	0.857	0.937	Serous ovarian cancer, Overall prostate cancer	0.0129107	23494856	8	22904410	23511722	G	A
rs13265582	LOXL2	1.87385e-05	1.28668e-06	0.895	0.856	0.936	Serous ovarian cancer, Overall prostate cancer	0.0119365	23497421	8	22904410	23511722	G	C
rs189897331	LOXL2	3.15811e-06	1.91786e-07	0.887	0.848	0.928	Endometrioid ovarian cancer, Clear cell ovarian cancer, Overall prostate cancer	0.00260927	23507360	8	22904410	23511722	T	G
rs1949163	LOXL2	1.0208e-05	6.70935e-07	0.898	0.86	0.937	Endometrioid ovarian cancer, Clear cell ovarian cancer, Overall prostate cancer	0.00756063	23498935	8	22904410	23511722	C	T
rs1949164	LOXL2	3.06112e-05	2.18094e-06	0.899	0.86	0.94	Endometrioid ovarian cancer, Clear cell ovarian cancer, Overall prostate cancer	0.0177999	23498855	8	22904410	23511722	A	G
rs10163145	MORF4L1	2.57732e-11	1.3781e-12	1.177	1.125	1.232	Overall lung cancer, Clear cell ovarian cancer	2.82988e-08	79075335	15	78915123	79440081	G	A
rs11072812	MORF4L1	7.49988e-05	5.73902e-06	1.109	1.061	1.16	Overall lung cancer, Clear cell ovarian cancer	0.0360371	79140111	15	78915123	79440081	C	T
rs11636753	MORF4L1	2.28671e-05	1.59358e-06	0.893	0.853	0.935	Overall lung cancer, Clear cell ovarian cancer	0.0139285	78928946	15	78915123	79440081	G	T
rs11857532	MORF4L1	4.26337e-17	1.00452e-18	1.178	1.136	1.222	Overall lung cancer, Clear cell ovarian cancer	8.89418e-14	78968268	15	78915123	79440081	T	G
rs12324870	MORF4L1	1.16681e-07	5.84647e-09	0.875	0.836	0.915	Overall lung cancer, Clear cell ovarian cancer	0.000113658	78995801	15	78915123	79440081	C	T
rs12899147	MORF4L1	1.53237e-13	4.50244e-15	1.11	1.081	1.139	Overall lung cancer, Lung adenocarcinoma, Clear cell ovarian cancer	1.96726e-10	79079512	15	78915123	79440081	A	G
rs12901241	MORF4L1	2.76652e-07	1.45244e-08	0.875	0.835	0.916	Overall lung cancer, Clear cell ovarian cancer	0.00026135	79002662	15	78915123	79440081	A	G
rs12903613	MORF4L1	2.92147e-05	2.07402e-06	0.933	0.907	0.96	Overall lung cancer, Lung adenocarcinoma, Clear cell ovarian cancer	0.0172497	79129076	15	78915123	79440081	G	T
rs12905273	MORF4L1	2.56121e-07	1.33893e-08	0.871	0.83	0.913	Overall lung cancer, Clear cell ovarian cancer	0.000243794	79002755	15	78915123	79440081	A	G
rs12905641	MORF4L1	5.30587e-07	2.89e-08	0.883	0.845	0.923	Overall lung cancer, Clear cell ovarian cancer	0.000483011	78964362	15	78915123	79440081	C	T
rs12910237	MORF4L1	1.6173e-07	1.03714e-08	0.878	0.84	0.918	Overall lung cancer, Clear cell ovarian cancer	0.000155722	78956338	15	78915123	79440081	C	T
rs12915539	MORF4L1	1.18923e-08	6.28092e-10	0.869	0.831	0.908	Overall lung cancer, Clear cell ovarian cancer	1.21022e-05	78940795	15	78915123	79440081	T	A
rs1994016	MORF4L1	1.54983e-12	4.89714e-14	1.167	1.121	1.214	Overall lung cancer, Clear cell ovarian cancer	1.77975e-09	79080234	15	78915123	79440081	C	T
rs28444683	MORF4L1	0.000104279	1.43834e-05	0.892	0.848	0.94	Overall lung cancer, Clear cell ovarian cancer	0.0462794	78984507	15	78915123	79440081	C	A
rs28455815	MORF4L1	2.98564e-05	2.1231e-06	0.932	0.906	0.96	Overall lung cancer, Lung adenocarcinoma, Clear cell ovarian cancer	0.0174634	79114453	15	78915123	79440081	C	T
rs28580532	MORF4L1	7.19111e-05	5.48365e-06	1.109	1.061	1.16	Overall lung cancer, Clear cell ovarian cancer	0.0351258	79134724	15	78915123	79440081	C	T
rs2904130	MORF4L1	9.44638e-06	6.17509e-07	1.113	1.067	1.161	Overall lung cancer, Clear cell ovarian cancer	0.00716614	78916622	15	78915123	79440081	C	G
rs34275594	MORF4L1	4.95345e-06	3.40104e-07	0.886	0.846	0.928	Overall lung cancer, Clear cell ovarian cancer	0.00396292	78981282	15	78915123	79440081	A	C
rs34694149	MORF4L1	3.75599e-07	2.00591e-08	0.882	0.844	0.922	Overall lung cancer, Clear cell ovarian cancer	0.000346967	78965917	15	78915123	79440081	C	T
rs35474770	MORF4L1	3.31643e-15	8.73275e-17	1.127	1.095	1.159	Overall lung cancer, Lung adenocarcinoma, Clear cell ovarian cancer	5.01127e-12	79074000	15	78915123	79440081	A	G
rs35701817	MORF4L1	9.59271e-06	6.27749e-07	0.882	0.84	0.927	Overall lung cancer, Clear cell ovarian cancer	0.0072333	79004968	15	78915123	79440081	A	G
rs35704045	MORF4L1	1.71069e-06	1.29578e-07	0.874	0.831	0.919	Overall lung cancer, Clear cell ovarian cancer	0.00144313	79003292	15	78915123	79440081	G	C
rs36045869	MORF4L1	4.25703e-05	6.25704e-06	0.891	0.847	0.936	Overall lung cancer, Clear cell ovarian cancer	0.0228694	78929498	15	78915123	79440081	C	T
rs4132786	MORF4L1	9.21339e-05	7.17261e-06	1.108	1.06	1.159	Overall lung cancer, Clear cell ovarian cancer	0.0423211	79141588	15	78915123	79440081	G	A
rs4468572	MORF4L1	8.53092e-06	5.53718e-07	0.931	0.906	0.958	Overall lung cancer, Lung adenocarcinoma, Clear cell ovarian cancer	0.00651112	79124475	15	78915123	79440081	T	C
rs58946838	MORF4L1	5.52333e-07	3.67326e-08	0.881	0.842	0.922	Overall lung cancer, Clear cell ovarian cancer	0.000500986	78961449	15	78915123	79440081	A	C
rs61630816	MORF4L1	7.77629e-07	4.64138e-08	0.882	0.843	0.923	Overall lung cancer, Clear cell ovarian cancer	0.000692787	78965866	15	78915123	79440081	T	C
rs62010555	MORF4L1	1.6059e-05	1.3366e-06	0.882	0.839	0.928	Overall lung cancer, Clear cell ovarian cancer	0.0105871	79007555	15	78915123	79440081	G	A
rs67745769	MORF4L1	5.68102e-05	4.24949e-06	1.056	1.032	1.08	Overall lung cancer, Lung adenocarcinoma, Squamous cell lung cancer, Clear cell ovarian cancer	0.0291434	79124832	15	78915123	79440081	G	A
rs7165733	MORF4L1	1.00275e-05	6.58247e-07	0.931	0.905	0.958	Overall lung cancer, Lung adenocarcinoma, Clear cell ovarian cancer	0.00749347	79123505	15	78915123	79440081	G	A
rs7166764	MORF4L1	2.91555e-05	2.06949e-06	0.931	0.904	0.959	Overall lung cancer, Lung adenocarcinoma, Clear cell ovarian cancer	0.0172497	79123509	15	78915123	79440081	T	G
rs7168915	MORF4L1	2.82477e-05	2.00023e-06	0.933	0.906	0.96	Overall lung cancer, Lung adenocarcinoma, Clear cell ovarian cancer	0.0168773	79128889	15	78915123	79440081	G	A
rs7169223	MORF4L1	3.61668e-07	2.31378e-08	0.877	0.837	0.918	Overall lung cancer, Clear cell ovarian cancer	0.000336583	78992116	15	78915123	79440081	A	G
rs7173743	MORF4L1	6.20531e-05	4.67504e-06	1.109	1.061	1.159	Overall lung cancer, Clear cell ovarian cancer	0.0313195	79141784	15	78915123	79440081	T	C
rs7178007	MORF4L1	9.38302e-07	5.28445e-08	0.884	0.846	0.924	Overall lung cancer, Clear cell ovarian cancer	0.000830023	78965254	15	78915123	79440081	G	A
rs7178750	MORF4L1	0.000102782	8.07615e-06	0.933	0.905	0.962	Overall lung cancer, Lung adenocarcinoma, Clear cell ovarian cancer	0.0459475	79126909	15	78915123	79440081	G	A
rs7179953	MORF4L1	8.25191e-06	5.34375e-07	0.931	0.905	0.957	Overall lung cancer, Lung adenocarcinoma, Clear cell ovarian cancer	0.00631743	79121776	15	78915123	79440081	C	T
rs7181405	MORF4L1	3.16015e-09	2.61661e-10	0.869	0.831	0.907	Overall lung cancer, Clear cell ovarian cancer	3.31012e-06	78948152	15	78915123	79440081	A	G
rs7181432	MORF4L1	1.02958e-05	6.7711e-07	0.931	0.905	0.958	Overall lung cancer, Lung adenocarcinoma, Clear cell ovarian cancer	0.00758076	79123779	15	78915123	79440081	C	T
rs7182103	MORF4L1	1.05512e-05	6.95108e-07	0.931	0.905	0.958	Overall lung cancer, Lung adenocarcinoma, Clear cell ovarian cancer	0.00769739	79123946	15	78915123	79440081	G	T
rs7182529	MORF4L1	2.26261e-05	1.57553e-06	0.931	0.904	0.959	Overall lung cancer, Lung adenocarcinoma, Clear cell ovarian cancer	0.0138153	79123631	15	78915123	79440081	T	C
rs7182716	MORF4L1	2.26e-05	1.57358e-06	0.931	0.904	0.959	Overall lung cancer, Lung adenocarcinoma, Clear cell ovarian cancer	0.0138153	79123753	15	78915123	79440081	T	C
rs79609284	MORF4L1	1.4996e-05	1.21748e-06	0.884	0.841	0.929	Overall lung cancer, Clear cell ovarian cancer	0.0100748	78928411	15	78915123	79440081	G	A
rs8034274	MORF4L1	4.94944e-05	3.66147e-06	0.932	0.904	0.96	Overall lung cancer, Lung adenocarcinoma, Clear cell ovarian cancer	0.0261403	79126155	15	78915123	79440081	T	C
rs8037171	MORF4L1	5.78859e-05	4.33653e-06	1.11	1.062	1.161	Overall lung cancer, Clear cell ovarian cancer	0.029574	79139478	15	78915123	79440081	C	A
rs8038920	MORF4L1	3.00014e-07	4.90924e-08	1.135	1.084	1.187	Overall lung cancer, Clear cell ovarian cancer	0.000281296	78974545	15	78915123	79440081	A	G
rs922691	MORF4L1	3.66223e-07	2.37946e-08	0.881	0.842	0.921	Overall lung cancer, Clear cell ovarian cancer	0.000339559	78963994	15	78915123	79440081	A	G
rs9920968	MORF4L1	8.32512e-05	6.42611e-06	0.948	0.926	0.97	Overall lung cancer, Lung adenocarcinoma, Squamous cell lung cancer, Clear cell ovarian cancer	0.0392491	79118747	15	78915123	79440081	G	A
rs1045210	PHC3	3.70739e-06	1.07064e-06	0.889	0.848	0.932	Clear cell ovarian cancer, Overall prostate cancer	0.00302318	170114078	3	169555368	170149537	A	C
rs12486850	PHC3	7.20231e-05	8.06748e-06	0.909	0.872	0.948	Colorectal cancer, Clear cell ovarian cancer, Overall prostate cancer	0.0351258	170122676	3	169555368	170149537	G	A
rs12487040	PHC3	3.69141e-06	9.15343e-07	0.888	0.847	0.931	Clear cell ovarian cancer, Overall prostate cancer	0.00301999	170103592	3	169555368	170149537	T	C
rs12491115	PHC3	1.74931e-05	2.50205e-06	0.891	0.849	0.935	Clear cell ovarian cancer, Overall prostate cancer	0.0113452	170125604	3	169555368	170149537	A	T
rs12634437	PHC3	4.59518e-05	6.68947e-06	0.894	0.852	0.939	Clear cell ovarian cancer, Overall prostate cancer	0.0244759	170126305	3	169555368	170149537	A	G
rs140861594	PHC3	1.38031e-06	7.95726e-08	0.827	0.772	0.887	Squamous cell lung cancer, Overall prostate cancer	0.00118339	169971557	3	169555368	170149537	C	T
rs148376875	PHC3	3.9215e-09	1.6677e-10	0.834	0.788	0.882	Colorectal cancer, Overall prostate cancer	4.05668e-06	170126707	3	169555368	170149537	G	T
rs2422035	PHC3	7.54509e-05	1.33162e-05	0.912	0.875	0.95	Colorectal cancer, Clear cell ovarian cancer, Overall prostate cancer	0.0361849	170145272	3	169555368	170149537	G	A
rs35763188	PHC3	4.78986e-05	1.32857e-05	0.897	0.855	0.942	Clear cell ovarian cancer, Overall prostate cancer	0.0254047	170133401	3	169555368	170149537	A	G
rs4582064	PHC3	9.17886e-05	9.9388e-06	0.911	0.875	0.95	Colorectal cancer, Clear cell ovarian cancer, Overall prostate cancer	0.04224	170095914	3	169555368	170149537	C	T
rs62293499	PHC3	3.98535e-05	1.10377e-05	0.897	0.855	0.942	Clear cell ovarian cancer, Overall prostate cancer	0.0216421	170140153	3	169555368	170149537	A	C
rs6444924	PHC3	4.37172e-05	6.56468e-06	0.894	0.851	0.938	Clear cell ovarian cancer, Overall prostate cancer	0.0233353	170123048	3	169555368	170149537	A	C
rs6762828	PHC3	7.2541e-05	8.05601e-06	0.909	0.872	0.948	Colorectal cancer, Clear cell ovarian cancer, Overall prostate cancer	0.0351258	170122872	3	169555368	170149537	C	T
rs78416326	PHC3	1.8088e-11	6.21436e-13	0.845	0.807	0.885	Colorectal cancer, Overall prostate cancer	2.00362e-08	170074517	3	169555368	170149537	G	C
rs138738957	POU5F1	7.87952e-05	1.28165e-05	1.1	1.054	1.148	Overall lung cancer, Squamous cell lung cancer, Colorectal cancer, Serous ovarian cancer	0.0376446	31035391	6	30882114	31388451	G	T
rs2233980	POU5F1	2.79054e-05	1.97415e-06	1.108	1.062	1.155	Overall lung cancer, Squamous cell lung cancer, Serous ovarian cancer	0.0167127	31079644	6	30882114	31388451	G	A
rs2523571	POU5F1	1.12026e-06	6.37672e-08	1.106	1.066	1.147	Overall lung cancer, Squamous cell lung cancer, Colorectal cancer, Serous ovarian cancer, Endometrioid ovarian cancer	0.000983952	31329691	6	30882114	31388451	T	A
rs2523573	POU5F1	1.27884e-06	7.56071e-08	1.114	1.071	1.159	Overall lung cancer, Squamous cell lung cancer, Serous ovarian cancer	0.00110396	31328988	6	30882114	31388451	C	G
rs2523593	POU5F1	1.14518e-06	6.57074e-08	1.115	1.072	1.16	Overall lung cancer, Squamous cell lung cancer, Serous ovarian cancer	0.000998905	31326703	6	30882114	31388451	T	C
rs2523607	POU5F1	1.30249e-05	8.71023e-07	1.099	1.058	1.14	Overall lung cancer, Squamous cell lung cancer, Colorectal cancer, Serous ovarian cancer, Endometrioid ovarian cancer	0.00888867	31322790	6	30882114	31388451	T	A
rs3094222	POU5F1	1.17487e-05	7.79912e-07	1.109	1.064	1.155	Overall lung cancer, Squamous cell lung cancer, Serous ovarian cancer	0.00840338	31081434	6	30882114	31388451	A	G
rs3095300	POU5F1	5.57543e-05	6.54165e-05	1.075	1.037	1.114	Overall lung cancer, Squamous cell lung cancer, Colorectal cancer, Serous ovarian cancer	0.0287786	31082476	6	30882114	31388451	C	T
rs3095315	POU5F1	4.32963e-05	4.16444e-05	1.076	1.039	1.114	Overall lung cancer, Squamous cell lung cancer, Colorectal cancer, Serous ovarian cancer	0.02316	31089204	6	30882114	31388451	C	T
rs3095318	POU5F1	7.24602e-05	6.93163e-05	1.075	1.037	1.113	Overall lung cancer, Squamous cell lung cancer, Colorectal cancer, Serous ovarian cancer	0.0351258	31088145	6	30882114	31388451	T	A
rs3131006	POU5F1	0.000102356	8.60506e-05	1.08	1.039	1.122	Overall lung cancer, Squamous cell lung cancer, Serous ovarian cancer	0.0459475	31098134	6	30882114	31388451	A	T
rs3132541	POU5F1	1.47142e-05	9.92667e-07	1.108	1.063	1.154	Overall lung cancer, Squamous cell lung cancer, Serous ovarian cancer	0.00992877	31098734	6	30882114	31388451	A	C
rs2811529	RUVBL1	7.32122e-06	4.7021e-07	0.891	0.851	0.932	Endometrioid ovarian cancer, Overall prostate cancer	0.00567433	127994160	3	127549800	128092671	G	A
rs9838120	RUVBL1	5.02247e-05	3.71985e-06	0.891	0.848	0.936	Endometrioid ovarian cancer, Overall prostate cancer	0.0264146	127930459	3	127549800	128092671	A	G
rs4857875	RUVBL1	3.06637e-05	2.29466e-06	0.892	0.85	0.935	Endometrioid ovarian cancer, Overall prostate cancer	0.0177999	127934276	3	127549800	128092671	C	T
rs9879866	RUVBL1	3.07117e-05	2.29443e-06	0.892	0.85	0.935	Endometrioid ovarian cancer, Overall prostate cancer	0.0177999	127936532	3	127549800	128092671	C	T
rs9879865	RUVBL1	3.07163e-05	2.29443e-06	0.892	0.85	0.935	Endometrioid ovarian cancer, Overall prostate cancer	0.0177999	127936527	3	127549800	128092671	C	T
rs6439121	RUVBL1	3.08011e-05	2.29469e-06	0.892	0.85	0.935	Endometrioid ovarian cancer, Overall prostate cancer	0.0178079	127935461	3	127549800	128092671	G	C
rs9814834	RUVBL1	3.15711e-05	2.3591e-06	0.892	0.85	0.935	Endometrioid ovarian cancer, Overall prostate cancer	0.0181691	127938137	3	127549800	128092671	G	A
rs4323023	RUVBL1	3.1976e-05	2.35664e-06	0.892	0.85	0.935	Endometrioid ovarian cancer, Overall prostate cancer	0.0183179	127939357	3	127549800	128092671	T	A
rs4384971	RUVBL1	3.29783e-05	2.50984e-06	0.892	0.851	0.935	Endometrioid ovarian cancer, Overall prostate cancer	0.0188061	127934774	3	127549800	128092671	C	A
rs4857871	RUVBL1	3.31353e-05	2.49172e-06	0.892	0.85	0.935	Endometrioid ovarian cancer, Overall prostate cancer	0.0188526	127933786	3	127549800	128092671	C	T
rs9830294	RUVBL1	1.26692e-05	8.45554e-07	0.893	0.853	0.934	Endometrioid ovarian cancer, Overall prostate cancer	0.0088841	127946788	3	127549800	128092671	G	A
rs9873786	RUVBL1	2.92156e-05	2.07409e-06	0.893	0.852	0.936	Endometrioid ovarian cancer, Overall prostate cancer	0.0172497	127942379	3	127549800	128092671	A	G
rs6439122	RUVBL1	9.44609e-05	7.36929e-06	0.893	0.85	0.938	Endometrioid ovarian cancer, Overall prostate cancer	0.0433105	127940534	3	127549800	128092671	A	G
rs4857836	RUVBL1	3.32188e-05	2.38167e-06	0.895	0.855	0.937	Endometrioid ovarian cancer, Overall prostate cancer	0.0188573	127836287	3	127549800	128092671	C	T
rs6414310	RUVBL1	3.97524e-05	2.8902e-06	0.896	0.856	0.938	Endometrioid ovarian cancer, Overall prostate cancer	0.0216341	127856573	3	127549800	128092671	T	A
rs4857837	RUVBL1	9.11645e-05	7.09081e-06	0.896	0.854	0.94	Endometrioid ovarian cancer, Overall prostate cancer	0.04203	127836319	3	127549800	128092671	A	G
rs4857866	RUVBL1	5.98706e-05	4.49749e-06	0.898	0.857	0.94	Endometrioid ovarian cancer, Overall prostate cancer	0.0303403	127819062	3	127549800	128092671	G	C
rs9843281	RUVBL1	2.09873e-05	1.45324e-06	0.906	0.87	0.943	Colorectal cancer, Endometrioid ovarian cancer, Overall prostate cancer	0.0129409	127961396	3	127549800	128092671	A	T
rs4857878	RUVBL1	5.51788e-05	4.11776e-06	0.906	0.868	0.945	Colorectal cancer, Endometrioid ovarian cancer, Overall prostate cancer	0.0285404	127948149	3	127549800	128092671	T	C
rs6770140	RUVBL1	6.36888e-05	4.80847e-06	0.906	0.868	0.945	Colorectal cancer, Endometrioid ovarian cancer, Overall prostate cancer	0.031931	127934329	3	127549800	128092671	T	C
rs6439123	RUVBL1	6.37747e-05	4.81548e-06	0.906	0.868	0.945	Colorectal cancer, Endometrioid ovarian cancer, Overall prostate cancer	0.031931	127941439	3	127549800	128092671	T	C
rs6775988	RUVBL1	6.50874e-05	4.9228e-06	0.906	0.868	0.945	Colorectal cancer, Endometrioid ovarian cancer, Overall prostate cancer	0.0324584	127944477	3	127549800	128092671	C	G
rs9847576	RUVBL1	6.65524e-05	5.04278e-06	0.906	0.868	0.945	Colorectal cancer, Endometrioid ovarian cancer, Overall prostate cancer	0.0328672	127937645	3	127549800	128092671	A	G
rs4857873	RUVBL1	6.65541e-05	5.04292e-06	0.906	0.868	0.945	Colorectal cancer, Endometrioid ovarian cancer, Overall prostate cancer	0.0328672	127934218	3	127549800	128092671	A	G
rs4857874	RUVBL1	6.65541e-05	5.04292e-06	0.906	0.868	0.945	Colorectal cancer, Endometrioid ovarian cancer, Overall prostate cancer	0.0328672	127934269	3	127549800	128092671	A	T
rs4857872	RUVBL1	6.65553e-05	5.04302e-06	0.906	0.868	0.945	Colorectal cancer, Endometrioid ovarian cancer, Overall prostate cancer	0.0328672	127933822	3	127549800	128092671	T	G
rs7372439	RUVBL1	6.65637e-05	5.04371e-06	0.906	0.868	0.945	Colorectal cancer, Endometrioid ovarian cancer, Overall prostate cancer	0.0328672	127931402	3	127549800	128092671	A	G
rs4857838	RUVBL1	6.80166e-05	5.16294e-06	0.906	0.869	0.945	Colorectal cancer, Endometrioid ovarian cancer, Overall prostate cancer	0.0334527	127943328	3	127549800	128092671	A	G
rs4857877	RUVBL1	7.26841e-05	5.54749e-06	0.906	0.868	0.945	Colorectal cancer, Endometrioid ovarian cancer, Overall prostate cancer	0.0351272	127948060	3	127549800	128092671	A	G
rs9845651	RUVBL1	7.42522e-05	5.67719e-06	0.906	0.869	0.946	Colorectal cancer, Endometrioid ovarian cancer, Overall prostate cancer	0.0358159	127940353	3	127549800	128092671	T	G
rs9857235	RUVBL1	8.21262e-05	6.33207e-06	0.906	0.868	0.946	Colorectal cancer, Endometrioid ovarian cancer, Overall prostate cancer	0.0390868	127939034	3	127549800	128092671	A	T
rs2687729	RUVBL1	0.000101207	7.94197e-06	1.102	1.056	1.15	Colorectal cancer, Endometrioid ovarian cancer, Overall prostate cancer	0.0455691	127895226	3	127549800	128092671	A	G
rs2999052	RUVBL1	0.000103452	8.13328e-06	1.102	1.056	1.15	Colorectal cancer, Endometrioid ovarian cancer, Overall prostate cancer	0.0461141	127892037	3	127549800	128092671	T	C
rs883238	RUVBL1	0.000113319	8.97888e-06	1.102	1.056	1.151	Colorectal cancer, Endometrioid ovarian cancer, Overall prostate cancer	0.0494226	127913263	3	127549800	128092671	A	G
rs2811481	RUVBL1	8.28148e-05	6.38962e-06	1.103	1.057	1.151	Colorectal cancer, Endometrioid ovarian cancer, Overall prostate cancer	0.039191	127904496	3	127549800	128092671	T	C
rs2811516	RUVBL1	5.6743e-05	4.24406e-06	1.104	1.059	1.152	Colorectal cancer, Endometrioid ovarian cancer, Overall prostate cancer	0.0291434	127905451	3	127549800	128092671	A	G
rs2999048	RUVBL1	4.12027e-05	3.00409e-06	1.115	1.065	1.168	Endometrioid ovarian cancer, Overall prostate cancer	0.0222301	127878416	3	127549800	128092671	G	A
rs2955118	RUVBL1	3.74224e-05	2.70798e-06	1.116	1.066	1.168	Endometrioid ovarian cancer, Overall prostate cancer	0.0207857	127882064	3	127549800	128092671	G	A
rs67451924	RUVBL1	3.75292e-05	2.71631e-06	1.116	1.066	1.169	Endometrioid ovarian cancer, Overall prostate cancer	0.0207857	127867397	3	127549800	128092671	G	A
rs2955102	RUVBL1	8.2718e-05	6.38153e-06	1.116	1.064	1.171	Endometrioid ovarian cancer, Overall prostate cancer	0.039191	127865510	3	127549800	128092671	A	G
rs2461794	RUVBL1	1.29894e-05	8.6848e-07	1.117	1.069	1.167	Endometrioid ovarian cancer, Overall prostate cancer	0.00888867	127870060	3	127549800	128092671	G	A
rs2999049	RUVBL1	6.72495e-05	5.09996e-06	1.117	1.065	1.172	Endometrioid ovarian cancer, Overall prostate cancer	0.0331405	127878817	3	127549800	128092671	T	C
rs1554535	RUVBL1	1.97495e-05	1.36137e-06	1.118	1.069	1.17	Endometrioid ovarian cancer, Overall prostate cancer	0.0124224	127895986	3	127549800	128092671	G	A
rs2999045	RUVBL1	6.35677e-05	4.79858e-06	1.118	1.066	1.173	Endometrioid ovarian cancer, Overall prostate cancer	0.031931	127865397	3	127549800	128092671	A	G
rs872267	RUVBL1	1.85382e-05	1.27192e-06	1.119	1.069	1.17	Endometrioid ovarian cancer, Overall prostate cancer	0.011839	127888067	3	127549800	128092671	G	A
rs2955120	RUVBL1	3.84726e-05	2.79e-06	1.119	1.067	1.173	Endometrioid ovarian cancer, Overall prostate cancer	0.0211213	127888347	3	127549800	128092671	T	G
rs2811480	RUVBL1	5.30149e-05	3.94356e-06	1.119	1.067	1.174	Endometrioid ovarian cancer, Overall prostate cancer	0.0276497	127902091	3	127549800	128092671	G	T
rs2811479	RUVBL1	5.45659e-05	4.06836e-06	1.119	1.067	1.174	Endometrioid ovarian cancer, Overall prostate cancer	0.0283405	127901786	3	127549800	128092671	G	A
rs2811482	RUVBL1	1.29075e-05	8.62608e-07	1.12	1.071	1.172	Endometrioid ovarian cancer, Overall prostate cancer	0.00888867	127904943	3	127549800	128092671	C	T
rs2955117	RUVBL1	3.99537e-05	3.25654e-06	1.12	1.068	1.175	Endometrioid ovarian cancer, Overall prostate cancer	0.0216496	127881613	3	127549800	128092671	G	A
rs2687720	RUVBL1	1.0253e-05	6.74098e-07	1.121	1.072	1.172	Endometrioid ovarian cancer, Overall prostate cancer	0.00757152	127918955	3	127549800	128092671	C	T
rs2811512	RUVBL1	1.05612e-05	6.95815e-07	1.121	1.071	1.172	Endometrioid ovarian cancer, Overall prostate cancer	0.00769739	127911820	3	127549800	128092671	G	A
rs2811514	RUVBL1	2.44262e-05	1.71068e-06	1.121	1.07	1.174	Endometrioid ovarian cancer, Overall prostate cancer	0.0147703	127907929	3	127549800	128092671	A	G
rs2811513	RUVBL1	3.18469e-05	2.27589e-06	1.121	1.069	1.176	Endometrioid ovarian cancer, Overall prostate cancer	0.0182858	127909564	3	127549800	128092671	G	A
rs2811509	RUVBL1	3.25285e-05	2.3284e-06	1.121	1.069	1.176	Endometrioid ovarian cancer, Overall prostate cancer	0.0185919	127916551	3	127549800	128092671	G	A
rs2492285	RUVBL1	3.36192e-05	2.41261e-06	1.121	1.069	1.176	Endometrioid ovarian cancer, Overall prostate cancer	0.0190414	127918000	3	127549800	128092671	G	A
rs2811515	RUVBL1	2.97196e-05	2.11263e-06	1.122	1.07	1.176	Endometrioid ovarian cancer, Overall prostate cancer	0.0174241	127905518	3	127549800	128092671	G	A
rs2811508	RUVBL1	6.24974e-05	4.71126e-06	1.122	1.068	1.178	Endometrioid ovarian cancer, Overall prostate cancer	0.0314803	127920023	3	127549800	128092671	T	C
rs2811485	RUVBL1	1.15854e-05	7.68307e-07	1.123	1.073	1.176	Endometrioid ovarian cancer, Overall prostate cancer	0.00831032	127919046	3	127549800	128092671	G	T
rs76263556	RUVBL1	1.09179e-05	7.21007e-07	1.124	1.073	1.177	Endometrioid ovarian cancer, Overall prostate cancer	0.00792237	127919045	3	127549800	128092671	T	A
rs4857841	RUVBL1	7.18955e-07	3.98579e-08	1.126	1.079	1.175	Endometrioid ovarian cancer, Overall prostate cancer	0.000642802	128046643	3	127549800	128092671	G	A
rs144609957	RUVBL1	5.46447e-06	3.44057e-07	1.131	1.079	1.185	Endometrioid ovarian cancer, Overall prostate cancer	0.00431541	127869598	3	127549800	128092671	C	A
rs2107132	TADA2A	5.13927e-06	7.03196e-07	0.904	0.869	0.941	Lung adenocarcinoma, Overall prostate cancer	0.00408436	36084202	17	35516977	36087226	T	C
rs4794758	TADA2A	2.58588e-06	Both direction: 0.0268612207, 5.77161057115131E-006	Both: 1.13, 0.885	1.014, 0.84, respectively	1.266, 0.933, respectively	Susceptible: Serous ovarian cancer, protective: Overall prostate cancer	0.00215068	36080428	17	35516977	36087226	C	T
rs8066151	TADA2A	4.91861e-08	1.06534e-08	0.897	0.865	0.931	Lung adenocarcinoma, Overall prostate cancer	4.8099e-05	36083304	17	35516977	36087226	T	C
rs143875052	TET2	8.35385e-05	6.45015e-06	0.878	0.83	0.929	Overall ovarian cancer, Endometrioid ovarian cancer, Overall prostate cancer	0.0393105	106150555	4	105817842	106450960	C	T
rs17430251	TET2	5.94828e-05	5.94912e-06	0.877	0.829	0.928	Overall ovarian cancer, Endometrioid ovarian cancer, Overall prostate cancer	0.0302049	106115708	4	105817842	106450960	A	G
rs17508261	TET2	5.75385e-05	6.70888e-06	0.878	0.829	0.929	Overall ovarian cancer, Endometrioid ovarian cancer, Overall prostate cancer	0.0294566	106108902	4	105817842	106450960	T	C
rs34402524	TET2	2.8922e-05	2.05166e-06	0.878	0.832	0.926	Overall ovarian cancer, Endometrioid ovarian cancer, Overall prostate cancer	0.0171981	106196829	4	105817842	106450960	T	G
rs62331150	TET2	4.93356e-05	Both direction: 0.0088765583, 0.0004110582	Both: 1.085, 0.911	1.021, 0.865, respectively	1.153, 0.959, respectively	Susceptible: Overall breast cancer, Serous ovarian cancer, protective: Clear cell ovarian cancer, Overall prostate cancer	0.0261116	106069013	4	105817842	106450960	G	T
rs6533183	TET2	3.3896e-06	1.98598e-06	1.11	1.063	1.159	Endometrioid ovarian cancer, Overall prostate cancer	0.00279131	106133184	4	105817842	106450960	C	T
rs6825684	TET2	7.70748e-06	4.96772e-07	0.888	0.848	0.93	Colorectal cancer, Overall ovarian cancer, Endometrioid ovarian cancer, Overall prostate cancer	0.00593694	106084643	4	105817842	106450960	G	A
rs6839705	TET2	1.81707e-06	3.31934e-07	1.113	1.068	1.16	Endometrioid ovarian cancer, Overall prostate cancer	0.00152647	106144735	4	105817842	106450960	A	C
rs75321784	TET2	7.24493e-05	7.39818e-06	0.878	0.829	0.929	Overall ovarian cancer, Endometrioid ovarian cancer, Overall prostate cancer	0.0351258	106125022	4	105817842	106450960	A	G
rs78632895	TET2	7.06468e-05	1.45743e-05	0.876	0.826	0.93	Overall ovarian cancer, Endometrioid ovarian cancer, Overall prostate cancer	0.0346782	106123638	4	105817842	106450960	A	T
rs2079811	TGFB1	1.01971e-05	6.70166e-07	1.082	1.049	1.116	Squamous cell lung cancer, Overall prostate cancer, Aggressive prostate cancer	0.00756063	41986217	19	41586812	42109831	T	C
rs2316974	TGFB1	4.65468e-06	2.89947e-07	1.082	1.05	1.115	Squamous cell lung cancer, Overall prostate cancer, Aggressive prostate cancer	0.00374682	41986536	19	41586812	42109831	G	A
rs74738513	TGFB1	1.40148e-05	9.42163e-07	1.081	1.048	1.115	Squamous cell lung cancer, Overall prostate cancer, Aggressive prostate cancer	0.00950808	41985931	19	41586812	42109831	A	T
rs12622536	TNP1	3.81617e-07	2.03988e-08	0.909	0.879	0.94	Lung adenocarcinoma, Overall breast cancer	0.000351231	217936015	2	217474182	217974782	T	C
rs12996888	TNP1	4.15082e-05	1.32435e-05	0.914	0.878	0.952	Lung adenocarcinoma, Overall breast cancer	0.0223467	217936148	2	217474182	217974782	G	T
rs12997141	TNP1	5.27526e-05	1.42896e-05	0.915	0.879	0.952	Lung adenocarcinoma, Overall breast cancer	0.0275703	217936386	2	217474182	217974782	C	T
rs13002378	TNP1	9.10784e-05	3.31149e-05	0.915	0.877	0.954	Lung adenocarcinoma, Overall breast cancer	0.04203	217936746	2	217474182	217974782	A	C
rs13011060	TNP1	9.69905e-05	2.80922e-05	0.925	0.892	0.959	Lung adenocarcinoma, Overall breast cancer, Aggressive prostate cancer	0.044389	217938177	2	217474182	217974782	G	A
rs13011326	TNP1	0.000102481	2.80517e-05	0.925	0.892	0.959	Lung adenocarcinoma, Overall breast cancer, Aggressive prostate cancer	0.0459475	217938410	2	217474182	217974782	C	T
rs13025492	TNP1	9.83145e-05	3.51434e-05	0.915	0.877	0.954	Lung adenocarcinoma, Overall breast cancer	0.0448311	217933312	2	217474182	217974782	C	G
rs59848989	TNP1	0.000107169	2.60484e-05	0.924	0.891	0.959	Lung adenocarcinoma, Overall breast cancer, Aggressive prostate cancer	0.047234	217938807	2	217474182	217974782	G	A
rs11072763	WDR61	1.80768e-13	1.2706e-14	1.2	1.146	1.258	Overall lung cancer, Clear cell ovarian cancer	2.29715e-10	78724256	15	78325578	78841940	A	G
rs12442456	WDR61	2.05364e-10	9.86941e-12	0.805	0.757	0.857	Overall lung cancer, Clear cell ovarian cancer	2.216e-07	78751962	15	78325578	78841940	G	T
rs12592111	WDR61	4.176e-16	1.04131e-17	1.183	1.138	1.229	Overall lung cancer, Clear cell ovarian cancer	7.86036e-13	78767346	15	78325578	78841940	G	A
rs12593229	WDR61	1.33298e-15	3.42557e-17	1.179	1.135	1.225	Overall lung cancer, Clear cell ovarian cancer	2.22467e-12	78765290	15	78325578	78841940	T	G
rs12594711	WDR61	2.11543e-14	5.86439e-16	1.174	1.129	1.221	Overall lung cancer, Clear cell ovarian cancer	2.90978e-11	78793921	15	78325578	78841940	C	T
rs12910910	WDR61	5.29509e-16	1.32842e-17	1.179	1.135	1.225	Overall lung cancer, Clear cell ovarian cancer	9.6758e-13	78767850	15	78325578	78841940	C	T
rs12916801	WDR61	5.11873e-15	1.36386e-16	1.177	1.133	1.224	Overall lung cancer, Clear cell ovarian cancer	7.49376e-12	78769130	15	78325578	78841940	A	G
rs1964678	WDR61	4.21923e-15	1.11828e-16	1.18	1.134	1.227	Overall lung cancer, Clear cell ovarian cancer	6.25e-12	78754000	15	78325578	78841940	A	G
rs4299116	WDR61	1.17389e-16	2.83518e-18	1.182	1.139	1.228	Overall lung cancer, Clear cell ovarian cancer	2.38922e-13	78766194	15	78325578	78841940	T	A
rs4362358	WDR61	3.15904e-16	7.82141e-18	1.182	1.138	1.228	Overall lung cancer, Clear cell ovarian cancer	6.03695e-13	78796104	15	78325578	78841940	C	T
rs4887057	WDR61	1.07267e-16	2.58494e-18	0.846	0.815	0.878	Overall lung cancer, Clear cell ovarian cancer	2.20109e-13	78760918	15	78325578	78841940	G	A
rs5019044	WDR61	1.39835e-15	3.5981e-17	0.809	0.77	0.85	Overall lung cancer, Clear cell ovarian cancer	2.28801e-12	78796282	15	78325578	78841940	T	A
rs56117933	WDR61	6.92361e-31	9.26118e-33	1.324	1.264	1.387	Overall lung cancer, Clear cell ovarian cancer	3.27032e-27	78832349	15	78325578	78841940	T	C
rs8042238	WDR61	2.02035e-16	4.94603e-18	1.181	1.137	1.226	Overall lung cancer, Clear cell ovarian cancer	3.98251e-13	78774271	15	78325578	78841940	C	T
rs8042260	WDR61	4.87965e-16	1.22163e-17	1.181	1.137	1.227	Overall lung cancer, Clear cell ovarian cancer	9.04876e-13	78774374	15	78325578	78841940	A	G
rs8043227	WDR61	1.3492e-15	3.46835e-17	1.179	1.135	1.225	Overall lung cancer, Clear cell ovarian cancer	2.23682e-12	78768871	15	78325578	78841940	C	G
