# Supplementary material for: Genetic Variants in Epigenetic Pathways and Risks of Multiple Cancers in the GAME-ON Consortium
Source: Oxford University Press journal article supplement (doi:10.1158/1055-9965.epi-16-0728), 2017-01-23
Supplement: 10559965epi160728-sup-170119_1_supp_3765719_9h9kmy.xlsx [file 10559965epi160728-sup-170119_1_supp_3765719_9h9kmy.xlsx]

## Sheet: FunciSNP snps
Chromosome	Biofeature start	Biofeature end	Bio feature	Corresponding SNP ID	Corresponding SNP position	Tag SNP ID	Tag SNP position	D'	R squared	Distance from tag SNP	Nearest TSS, Gene Symbol	Promoter	5' UTR	Exon	Intron	3' UTR	Intergenic
19	17379801	17391799	Gm12878 combined segmentation T	rs10406920	17389648	rs10402468	17384003	1	1	5645	ANKLE1	NO	NO	NO	YES	NO	NO
19	17389201	17392159	H1hesc combined segmentation T	rs10406920	17389648	rs10402468	17384003	1	1	5645	ANKLE1	NO	NO	NO	YES	NO	NO
19	17379626	17392200	Huvec combined segmentation T	rs10406920	17389648	rs10402468	17384003	1	1	5645	ANKLE1	NO	NO	NO	YES	NO	NO
19	17389636	17389891	wgEncodeRegTfbsClustered	rs10406920	17389648	rs10402468	17384003	1	1	5645	ANKLE1	NO	NO	NO	YES	NO	NO
19	17379801	17391799	Gm12878 combined segmentation T	rs10416654	17385176	rs10402468	17384003	1	1	1173	BABAM1	NO	NO	NO	YES	NO	NO
19	17380201	17389000	H1hesc combined segmentation T	rs10416654	17385176	rs10402468	17384003	1	1	1173	BABAM1	NO	NO	NO	YES	NO	NO
19	17379626	17392200	Huvec combined segmentation T	rs10416654	17385176	rs10402468	17384003	1	1	1173	BABAM1	NO	NO	NO	YES	NO	NO
19	17379801	17391799	Gm12878 combined segmentation T	rs10418154	17386006	rs10402468	17384003	1	1	2003	ANKLE1	NO	NO	NO	YES	NO	NO
19	17380201	17389000	H1hesc combined segmentation T	rs10418154	17386006	rs10402468	17384003	1	1	2003	ANKLE1	NO	NO	NO	YES	NO	NO
19	17379626	17392200	Huvec combined segmentation T	rs10418154	17386006	rs10402468	17384003	1	1	2003	ANKLE1	NO	NO	NO	YES	NO	NO
19	17379801	17391799	Gm12878 combined segmentation T	rs10418362	17386107	rs10402468	17384003	1	0.971934241706162	2104	ANKLE1	NO	NO	NO	YES	NO	NO
19	17380201	17389000	H1hesc combined segmentation T	rs10418362	17386107	rs10402468	17384003	1	0.971934241706162	2104	ANKLE1	NO	NO	NO	YES	NO	NO
19	17379626	17392200	Huvec combined segmentation T	rs10418362	17386107	rs10402468	17384003	1	0.971934241706162	2104	ANKLE1	NO	NO	NO	YES	NO	NO
19	17422001	17422112	Gm12878 combined segmentation PF	rs10423120	17422036	rs10402468	17384003	0.940424477816844	0.859101072648946	38033	DDA1	NO	NO	NO	YES	NO	NO
19	17422006	17422396	H1hesc combined segmentation T	rs10423120	17422036	rs10402468	17384003	0.940424477816844	0.859101072648946	38033	DDA1	NO	NO	NO	YES	NO	NO
19	17421626	17428000	Huvec combined segmentation T	rs10423120	17422036	rs10402468	17384003	0.940424477816844	0.859101072648946	38033	DDA1	NO	NO	NO	YES	NO	NO
19	17379401	17379600	H1hesc combined segmentation PF	rs10424178	17379558	rs10402468	17384003	1	0.911298344157744	-4445	BABAM1	NO	NO	NO	YES	NO	NO
19	17379401	17379600	Huvec combined segmentation enh	rs10424178	17379558	rs10402468	17384003	1	0.911298344157744	-4445	BABAM1	NO	NO	NO	YES	NO	NO
19	17394201	17399677	Gm12878 combined segmentation T	rs10425939	17397244	rs10402468	17384003	1	1	13241	ANKLE1	NO	NO	YES	NO	NO	NO
19	17397025	17397480	Huvec combined segmentation T	rs10425939	17397244	rs10402468	17384003	1	1	13241	ANKLE1	NO	NO	YES	NO	NO	NO
19	17379801	17391799	Gm12878 combined segmentation T	rs10426697	17389156	rs10402468	17384003	0.990325920890316	0.95322006541267	5153	ANKLE1	NO	NO	NO	YES	NO	NO
19	17379626	17392200	Huvec combined segmentation T	rs10426697	17389156	rs10402468	17384003	0.990325920890316	0.95322006541267	5153	ANKLE1	NO	NO	NO	YES	NO	NO
19	17379801	17391799	Gm12878 combined segmentation T	rs112582668	17388923	rs10402468	17384003	1	0.981142167655584	4920	ANKLE1	NO	NO	NO	YES	NO	NO
19	17380201	17389000	H1hesc combined segmentation T	rs112582668	17388923	rs10402468	17384003	1	0.981142167655584	4920	ANKLE1	NO	NO	NO	YES	NO	NO
19	17379626	17392200	Huvec combined segmentation T	rs112582668	17388923	rs10402468	17384003	1	0.981142167655584	4920	ANKLE1	NO	NO	NO	YES	NO	NO
19	17379801	17391799	Gm12878 combined segmentation T	rs113272353	17384651	rs10402468	17384003	1	1	648	BABAM1	NO	NO	NO	YES	NO	NO
19	17380201	17389000	H1hesc combined segmentation T	rs113272353	17384651	rs10402468	17384003	1	1	648	BABAM1	NO	NO	NO	YES	NO	NO
19	17379626	17392200	Huvec combined segmentation T	rs113272353	17384651	rs10402468	17384003	1	1	648	BABAM1	NO	NO	NO	YES	NO	NO
19	17379801	17391799	Gm12878 combined segmentation T	rs113572125	17383732	rs10402468	17384003	1	0.911298344157744	-271	BABAM1	NO	NO	NO	YES	NO	NO
19	17380201	17389000	H1hesc combined segmentation T	rs113572125	17383732	rs10402468	17384003	1	0.911298344157744	-271	BABAM1	NO	NO	NO	YES	NO	NO
19	17379626	17392200	Huvec combined segmentation T	rs113572125	17383732	rs10402468	17384003	1	0.911298344157744	-271	BABAM1	NO	NO	NO	YES	NO	NO
19	17403221	17403530	EncodeDnaseI_only.known	rs11540855	17403361	rs10402468	17384003	1	0.990496251159758	19358	ANKLE1	NO	NO	NO	NO	YES	NO
19	17403098	17404003	EncodeFaire.known	rs11540855	17403361	rs10402468	17384003	1	0.990496251159758	19358	ANKLE1	NO	NO	NO	NO	YES	NO
19	17403016	17403774	Gm12878 combined segmentation TSS	rs11540855	17403361	rs10402468	17384003	1	0.990496251159758	19358	ANKLE1	NO	NO	NO	NO	YES	NO
19	17403088	17403905	H1hesc combined segmentation TSS	rs11540855	17403361	rs10402468	17384003	1	0.990496251159758	19358	ANKLE1	NO	NO	NO	NO	YES	NO
19	17403209	17403364	Huvec combined segmentation TSS	rs11540855	17403361	rs10402468	17384003	1	0.990496251159758	19358	ANKLE1	NO	NO	NO	NO	YES	NO
19	17402840	17403939	knownGene.Promoters.known	rs11540855	17403361	rs10402468	17384003	1	0.990496251159758	19358	ANKLE1	NO	NO	NO	NO	YES	NO
19	17403138	17403407	wgEncodeRegTfbsClustered	rs11540855	17403361	rs10402468	17384003	1	0.990496251159758	19358	ANKLE1	NO	NO	NO	NO	YES	NO
19	17377537	17378513	EncodeFaire.known	rs12980812	17377558	rs10402468	17384003	1	0.911298344157744	-6445	BABAM1	YES	NO	NO	NO	NO	YES
19	17377401	17377987	Gm12878 combined segmentation TSS	rs12980812	17377558	rs10402468	17384003	1	0.911298344157744	-6445	BABAM1	YES	NO	NO	NO	NO	YES
19	17377485	17377808	H1hesc combined segmentation WE	rs12980812	17377558	rs10402468	17384003	1	0.911298344157744	-6445	BABAM1	YES	NO	NO	NO	NO	YES
19	17377232	17378331	knownGene.Promoters.known	rs12980812	17377558	rs10402468	17384003	1	0.911298344157744	-6445	BABAM1	YES	NO	NO	NO	NO	YES
19	17377426	17377760	wgEncodeRegTfbsClustered	rs12980812	17377558	rs10402468	17384003	1	0.911298344157744	-6445	BABAM1	YES	NO	NO	NO	NO	YES
19	17371507	17372046	EncodeFaire.known	rs12982178	17371568	rs10402468	17384003	0.980240378543498	0.875640333260172	-12435	USHBP1	NO	NO	NO	YES	NO	NO
19	17371490	17371600	H1hesc combined segmentation WE	rs12982178	17371568	rs10402468	17384003	0.980240378543498	0.875640333260172	-12435	USHBP1	NO	NO	NO	YES	NO	NO
19	17371001	17372200	Huvec combined segmentation CTCF	rs12982178	17371568	rs10402468	17384003	0.980240378543498	0.875640333260172	-12435	USHBP1	NO	NO	NO	YES	NO	NO
19	17379801	17391799	Gm12878 combined segmentation T	rs34084277	17387176	rs10402468	17384003	1	1	3173	ANKLE1	NO	NO	NO	YES	NO	NO
19	17380201	17389000	H1hesc combined segmentation T	rs34084277	17387176	rs10402468	17384003	1	1	3173	ANKLE1	NO	NO	NO	YES	NO	NO
19	17379626	17392200	Huvec combined segmentation T	rs34084277	17387176	rs10402468	17384003	1	1	3173	ANKLE1	NO	NO	NO	YES	NO	NO
19	17356401	17358350	EncodeDnaseI_only.known	rs34963425	17358189	rs10402468	17384003	0.949478852201303	0.858667166087262	-25814	NR2F6	NO	NO	NO	NO	NO	YES
19	17358020	17358656	EncodeFaire.known	rs34963425	17358189	rs10402468	17384003	0.949478852201303	0.858667166087262	-25814	NR2F6	NO	NO	NO	NO	NO	YES
19	17357915	17358218	Huvec combined segmentation WE	rs34963425	17358189	rs10402468	17384003	0.949478852201303	0.858667166087262	-25814	NR2F6	NO	NO	NO	NO	NO	YES
19	17358003	17358226	wgEncodeRegTfbsClustered	rs34963425	17358189	rs10402468	17384003	0.949478852201303	0.858667166087262	-25814	NR2F6	NO	NO	NO	NO	NO	YES
19	17359241	17359670	EncodeDnaseI_only.known	rs35686037	17359535	rs10402468	17384003	0.969763444925296	0.895748074320404	-24468	NR2F6	NO	NO	NO	NO	NO	YES
19	17359367	17359699	EncodeFaire.known	rs35686037	17359535	rs10402468	17384003	0.969763444925296	0.895748074320404	-24468	NR2F6	NO	NO	NO	NO	NO	YES
19	17358201	17359800	H1hesc combined segmentation enh	rs35686037	17359535	rs10402468	17384003	0.969763444925296	0.895748074320404	-24468	NR2F6	NO	NO	NO	NO	NO	YES
19	17359263	17359552	wgEncodeRegTfbsClustered	rs35686037	17359535	rs10402468	17384003	0.969763444925296	0.895748074320404	-24468	NR2F6	NO	NO	NO	NO	NO	YES
19	17354678	17355266	EncodeFaire.known	rs4808611	17354825	rs10402468	17384003	0.931716061479479	0.859791779812297	-29178	NR2F6	NO	NO	NO	YES	NO	NO
19	17354601	17355200	Gm12878 combined segmentation PF	rs4808611	17354825	rs10402468	17384003	0.931716061479479	0.859791779812297	-29178	NR2F6	NO	NO	NO	YES	NO	NO
19	17354436	17357715	H1hesc combined segmentation TSS	rs4808611	17354825	rs10402468	17384003	0.931716061479479	0.859791779812297	-29178	NR2F6	NO	NO	NO	YES	NO	NO
19	17354762	17354963	wgEncodeRegTfbsClustered	rs4808611	17354825	rs10402468	17384003	0.931716061479479	0.859791779812297	-29178	NR2F6	NO	NO	NO	YES	NO	NO
19	17379801	17391799	Gm12878 combined segmentation T	rs4808613	17388065	rs10402468	17384003	1	1	4062	ANKLE1	NO	NO	NO	YES	YES	NO
19	17380201	17389000	H1hesc combined segmentation T	rs4808613	17388065	rs10402468	17384003	1	1	4062	ANKLE1	NO	NO	NO	YES	YES	NO
19	17379626	17392200	Huvec combined segmentation T	rs4808613	17388065	rs10402468	17384003	1	1	4062	ANKLE1	NO	NO	NO	YES	YES	NO
19	17379801	17391799	Gm12878 combined segmentation T	rs56028644	17388790	rs10402468	17384003	1	1	4787	ANKLE1	NO	NO	NO	YES	NO	NO
19	17380201	17389000	H1hesc combined segmentation T	rs56028644	17388790	rs10402468	17384003	1	1	4787	ANKLE1	NO	NO	NO	YES	NO	NO
19	17379626	17392200	Huvec combined segmentation T	rs56028644	17388790	rs10402468	17384003	1	1	4787	ANKLE1	NO	NO	NO	YES	NO	NO
19	17372159	17372200	Gm12878 combined segmentation CTCF	rs58925582	17372199	rs10402468	17384003	0.990132594531975	0.893402772822141	-11804	USHBP1	NO	NO	NO	YES	NO	NO
19	17371001	17372200	Huvec combined segmentation CTCF	rs58925582	17372199	rs10402468	17384003	0.990132594531975	0.893402772822141	-11804	USHBP1	NO	NO	NO	YES	NO	NO
19	17379801	17391799	Gm12878 combined segmentation T	rs61634114	17387254	rs10402468	17384003	1	1	3251	ANKLE1	NO	NO	NO	YES	NO	NO
19	17380201	17389000	H1hesc combined segmentation T	rs61634114	17387254	rs10402468	17384003	1	1	3251	ANKLE1	NO	NO	NO	YES	NO	NO
19	17379626	17392200	Huvec combined segmentation T	rs61634114	17387254	rs10402468	17384003	1	1	3251	ANKLE1	NO	NO	NO	YES	NO	NO
19	17394201	17399677	Gm12878 combined segmentation T	rs66753001	17394839	rs10402468	17384003	1	1	10836	ANKLE1	NO	NO	NO	YES	NO	NO
19	17394801	17395200	H1hesc combined segmentation CTCF	rs66753001	17394839	rs10402468	17384003	1	1	10836	ANKLE1	NO	NO	NO	YES	NO	NO
19	17394601	17394938	Huvec combined segmentation T	rs66753001	17394839	rs10402468	17384003	1	1	10836	ANKLE1	NO	NO	NO	YES	NO	NO
19	17379801	17391799	Gm12878 combined segmentation T	rs67412075	17385502	rs10402468	17384003	1	0.990496251159758	1499	ANKLE1	NO	NO	NO	YES	NO	NO
19	17380201	17389000	H1hesc combined segmentation T	rs67412075	17385502	rs10402468	17384003	1	0.990496251159758	1499	ANKLE1	NO	NO	NO	YES	NO	NO
19	17379626	17392200	Huvec combined segmentation T	rs67412075	17385502	rs10402468	17384003	1	0.990496251159758	1499	ANKLE1	NO	NO	NO	YES	NO	NO
19	17356401	17358350	EncodeDnaseI_only.known	rs73012590	17358188	rs10402468	17384003	0.949478852201303	0.858667166087262	-25815	NR2F6	NO	NO	NO	NO	NO	YES
19	17358020	17358656	EncodeFaire.known	rs73012590	17358188	rs10402468	17384003	0.949478852201303	0.858667166087262	-25815	NR2F6	NO	NO	NO	NO	NO	YES
19	17357915	17358218	Huvec combined segmentation WE	rs73012590	17358188	rs10402468	17384003	0.949478852201303	0.858667166087262	-25815	NR2F6	NO	NO	NO	NO	NO	YES
19	17358003	17358226	wgEncodeRegTfbsClustered	rs73012590	17358188	rs10402468	17384003	0.949478852201303	0.858667166087262	-25815	NR2F6	NO	NO	NO	NO	NO	YES
19	17393159	17393925	EncodeFaire.known	rs73509996	17393449	rs10402468	17384003	1	1	9446	ANKLE1	NO	NO	NO	YES	NO	NO
19	17392041	17393613	Gm12878 combined segmentation TSS	rs73509996	17393449	rs10402468	17384003	1	1	9446	ANKLE1	NO	NO	NO	YES	NO	NO
19	17393285	17393582	H1hesc combined segmentation TSS	rs73509996	17393449	rs10402468	17384003	1	1	9446	ANKLE1	NO	NO	NO	YES	NO	NO
19	17392300	17393495	Huvec combined segmentation enh	rs73509996	17393449	rs10402468	17384003	1	1	9446	ANKLE1	NO	NO	NO	YES	NO	NO
19	17393277	17393776	wgEncodeRegTfbsClustered	rs73509996	17393449	rs10402468	17384003	1	1	9446	ANKLE1	NO	NO	NO	YES	NO	NO
19	17364401	17366000	H1hesc combined segmentation T	rs7508638	17365047	rs10402468	17384003	0.968238797436059	0.849073968537414	-18956	NR2F6	NO	NO	NO	YES	NO	NO
19	17360001	17371000	Huvec combined segmentation T	rs7508638	17365047	rs10402468	17384003	0.968238797436059	0.849073968537414	-18956	NR2F6	NO	NO	NO	YES	NO	NO
19	17379801	17391799	Gm12878 combined segmentation T	rs8170	17389704	rs10402468	17384003	1	1	5701	ANKLE1	NO	NO	YES	YES	NO	NO
19	17389201	17392159	H1hesc combined segmentation T	rs8170	17389704	rs10402468	17384003	1	1	5701	ANKLE1	NO	NO	YES	YES	NO	NO
19	17379626	17392200	Huvec combined segmentation T	rs8170	17389704	rs10402468	17384003	1	1	5701	ANKLE1	NO	NO	YES	YES	NO	NO
19	17389636	17389891	wgEncodeRegTfbsClustered	rs8170	17389704	rs10402468	17384003	1	1	5701	ANKLE1	NO	NO	YES	YES	NO	NO
19	38735288	38735820	H1hesc combined segmentation WE	rs11667256	38735804	rs11083450	38754239	1	0.958632639556857	-18435	PPP1R14A	NO	NO	NO	NO	NO	YES
19	38745760	38746632	EncodeFaire.known	rs12611084	38746272	rs11083450	38754239	1	0.818132454428933	-7967	PPP1R14A	NO	NO	NO	YES	NO	NO
19	38746201	38746997	H1hesc combined segmentation enh	rs12611084	38746272	rs11083450	38754239	1	0.818132454428933	-7967	PPP1R14A	NO	NO	NO	YES	NO	NO
19	38746132	38746335	wgEncodeRegTfbsClustered	rs12611084	38746272	rs11083450	38754239	1	0.818132454428933	-7967	PPP1R14A	NO	NO	NO	YES	NO	NO
19	38743581	38744310	EncodeDnaseI_only.known	rs12976534	38743962	rs11083450	38754239	1	0.958632639556857	-10277	PPP1R14A	NO	NO	NO	YES	NO	NO
19	38742401	38744626	H1hesc combined segmentation WE	rs12976534	38743962	rs11083450	38754239	1	0.958632639556857	-10277	PPP1R14A	NO	NO	NO	YES	NO	NO
19	38743919	38744182	wgEncodeRegTfbsClustered	rs12976534	38743962	rs11083450	38754239	1	0.958632639556857	-10277	PPP1R14A	NO	NO	NO	YES	NO	NO
19	38738001	38740200	H1hesc combined segmentation T	rs4802297	38738130	rs11083450	38754239	0.982885048417978	0.878492918794267	-16109	PPP1R14A	NO	NO	NO	NO	NO	YES
19	38745760	38746632	EncodeFaire.known	rs4803934	38746567	rs11083450	38754239	1	0.979092106442693	-7672	PPP1R14A	NO	NO	NO	YES	NO	NO
19	38746201	38746997	H1hesc combined segmentation enh	rs4803934	38746567	rs11083450	38754239	1	0.979092106442693	-7672	PPP1R14A	NO	NO	NO	YES	NO	NO
19	38746376	38746600	Huvec combined segmentation PF	rs4803934	38746567	rs11083450	38754239	1	0.979092106442693	-7672	PPP1R14A	NO	NO	NO	YES	NO	NO
19	38747001	38747600	Gm12878 combined segmentation CTCF	rs7247241	38747272	rs11083450	38754239	0.988460298884329	0.874529393058867	-6967	PPP1R14A	YES	NO	NO	NO	NO	YES
19	38747197	38747469	H1hesc combined segmentation CTCF	rs7247241	38747272	rs11083450	38754239	0.988460298884329	0.874529393058867	-6967	PPP1R14A	YES	NO	NO	NO	NO	YES
19	38746601	38747600	Huvec combined segmentation enh	rs7247241	38747272	rs11083450	38754239	0.988460298884329	0.874529393058867	-6967	PPP1R14A	YES	NO	NO	NO	NO	YES
19	38747053	38747322	wgEncodeRegTfbsClustered	rs7247241	38747272	rs11083450	38754239	0.988460298884329	0.874529393058867	-6967	PPP1R14A	YES	NO	NO	NO	NO	YES
19	38753545	38754023	H1hesc combined segmentation WE	rs7250689	38753625	rs11083450	38754239	1	1	-614	SPINT2	YES	NO	NO	NO	NO	YES
19	38747001	38747600	Gm12878 combined segmentation CTCF	rs8100395	38747117	rs11083450	38754239	1	0.95358615340654	-7122	PPP1R14A	YES	YES	NO	NO	NO	NO
19	38747092	38747196	H1hesc combined segmentation enh	rs8100395	38747117	rs11083450	38754239	1	0.95358615340654	-7122	PPP1R14A	YES	YES	NO	NO	NO	NO
19	38746601	38747600	Huvec combined segmentation enh	rs8100395	38747117	rs11083450	38754239	1	0.95358615340654	-7122	PPP1R14A	YES	YES	NO	NO	NO	NO
19	38746845	38747172	wgEncodeRegTfbsClustered	rs8100395	38747117	rs11083450	38754239	1	0.95358615340654	-7122	PPP1R14A	YES	YES	NO	NO	NO	NO
19	17379801	17391799	Gm12878 combined segmentation T	rs10419397	17391328	rs111961716	17398085	1	0.993153530718789	-6757	ANKLE1	YES	NO	NO	YES	NO	NO
19	17389201	17392159	H1hesc combined segmentation T	rs10419397	17391328	rs111961716	17398085	1	0.993153530718789	-6757	ANKLE1	YES	NO	NO	YES	NO	NO
19	17379626	17392200	Huvec combined segmentation T	rs10419397	17391328	rs111961716	17398085	1	0.993153530718789	-6757	ANKLE1	YES	NO	NO	YES	NO	NO
19	17408995	17412800	Gm12878 combined segmentation T	rs10424198	17409671	rs111961716	17398085	0.958411351094306	0.912284086060565	11586	ABHD8	NO	NO	NO	YES	NO	NO
19	17408998	17412407	H1hesc combined segmentation T	rs10424198	17409671	rs111961716	17398085	0.958411351094306	0.912284086060565	11586	ABHD8	NO	NO	NO	YES	NO	NO
19	17407601	17413400	Huvec combined segmentation T	rs10424198	17409671	rs111961716	17398085	0.958411351094306	0.912284086060565	11586	ABHD8	NO	NO	NO	YES	NO	NO
19	17400580	17400790	Gm12878 combined segmentation WE	rs113299211	17400765	rs111961716	17398085	1	1	2680	ANKLE1	NO	NO	NO	NO	NO	YES
19	17407634	17407745	Gm12878 combined segmentation T	rs13343778	17407695	rs111961716	17398085	0.993111957728858	0.979541011718177	9610	ABHD8	NO	NO	NO	YES	NO	NO
19	17407601	17413400	Huvec combined segmentation T	rs13343778	17407695	rs111961716	17398085	0.993111957728858	0.979541011718177	9610	ABHD8	NO	NO	NO	YES	NO	NO
19	17405401	17406400	Huvec combined segmentation T	rs28473003	17406167	rs111961716	17398085	0.993132807196967	0.986312772730928	8082	ABHD8	NO	NO	NO	YES	NO	NO
19	17379801	17391799	Gm12878 combined segmentation T	rs4808075	17390291	rs111961716	17398085	1	0.993153530718789	-7794	ANKLE1	NO	NO	NO	YES	NO	NO
19	17389201	17392159	H1hesc combined segmentation T	rs4808075	17390291	rs111961716	17398085	1	0.993153530718789	-7794	ANKLE1	NO	NO	NO	YES	NO	NO
19	17379626	17392200	Huvec combined segmentation T	rs4808075	17390291	rs111961716	17398085	1	0.993153530718789	-7794	ANKLE1	NO	NO	NO	YES	NO	NO
19	17394201	17399677	Gm12878 combined segmentation T	rs4808076	17395401	rs111961716	17398085	1	0.993153530718789	-2684	ANKLE1	NO	NO	NO	YES	NO	NO
19	17395304	17395635	Huvec combined segmentation T	rs4808076	17395401	rs111961716	17398085	1	0.993153530718789	-2684	ANKLE1	NO	NO	NO	YES	NO	NO
19	17403016	17403774	Gm12878 combined segmentation TSS	rs4808616	17403033	rs111961716	17398085	1	0.993153530718789	4948	ANKLE1	NO	NO	NO	NO	YES	NO
19	17402801	17403087	H1hesc combined segmentation enh	rs4808616	17403033	rs111961716	17398085	1	0.993153530718789	4948	ANKLE1	NO	NO	NO	NO	YES	NO
19	17402840	17403939	knownGene.Promoters.known	rs4808616	17403033	rs111961716	17398085	1	0.993153530718789	4948	ANKLE1	NO	NO	NO	NO	YES	NO
19	17404001	17404170	Gm12878 combined segmentation enh	rs55924783	17404072	rs111961716	17398085	1	0.993175966437998	5987	ABHD8	NO	NO	NO	YES	NO	NO
19	17404001	17404167	H1hesc combined segmentation enh	rs55924783	17404072	rs111961716	17398085	1	0.993175966437998	5987	ABHD8	NO	NO	NO	YES	NO	NO
19	17393159	17393925	EncodeFaire.known	rs56069439	17393925	rs111961716	17398085	1	0.993153530718789	-4160	ANKLE1	NO	NO	NO	YES	NO	NO
19	17393812	17394000	H1hesc combined segmentation enh	rs56069439	17393925	rs111961716	17398085	1	0.993153530718789	-4160	ANKLE1	NO	NO	NO	YES	NO	NO
19	17393615	17394400	Huvec combined segmentation CTCF	rs56069439	17393925	rs111961716	17398085	1	0.993153530718789	-4160	ANKLE1	NO	NO	NO	YES	NO	NO
19	17393458	17394050	wgEncodeRegTfbsClustered	rs56069439	17393925	rs111961716	17398085	1	0.993153530718789	-4160	ANKLE1	NO	NO	NO	YES	NO	NO
19	17401563	17402719	H1hesc combined segmentation T	rs61494113	17401859	rs111961716	17398085	1	0.993175966437998	3774	ANKLE1	NO	NO	NO	NO	NO	YES
19	17401801	17402200	Huvec combined segmentation CTCF	rs61494113	17401859	rs111961716	17398085	1	0.993175966437998	3774	ANKLE1	NO	NO	NO	NO	NO	YES
19	17401401	17401467	H1hesc combined segmentation T	rs67397200	17401404	rs111961716	17398085	1	0.993175966437998	3319	ANKLE1	NO	NO	NO	NO	NO	YES
3	170096402	170116063	Gm12878 combined segmentation T	rs1045210	170114078	rs12486850	170122676	0.98701518266072	0.829608768311039	-8598	CLDN11	NO	NO	NO	NO	YES	NO
3	170106026	170119404	Huvec combined segmentation T	rs1045210	170114078	rs12486850	170122676	0.98701518266072	0.829608768311039	-8598	CLDN11	NO	NO	NO	NO	YES	NO
3	170096402	170116063	Gm12878 combined segmentation T	rs11720323	170104013	rs12486850	170122676	0.980630137727524	0.828171299526402	-18663	SKIL	NO	NO	NO	YES	NO	NO
3	170096601	170113200	H1hesc combined segmentation T	rs11720323	170104013	rs12486850	170122676	0.980630137727524	0.828171299526402	-18663	SKIL	NO	NO	NO	YES	NO	NO
3	170090271	170105933	Huvec combined segmentation T	rs11720323	170104013	rs12486850	170122676	0.980630137727524	0.828171299526402	-18663	SKIL	NO	NO	NO	YES	NO	NO
3	170096402	170116063	Gm12878 combined segmentation T	rs12487040	170103592	rs12486850	170122676	0.967846246014105	0.815868725661453	-19084	SKIL	NO	NO	NO	YES	NO	NO
3	170096601	170113200	H1hesc combined segmentation T	rs12487040	170103592	rs12486850	170122676	0.967846246014105	0.815868725661453	-19084	SKIL	NO	NO	NO	YES	NO	NO
3	170090271	170105933	Huvec combined segmentation T	rs12487040	170103592	rs12486850	170122676	0.967846246014105	0.815868725661453	-19084	SKIL	NO	NO	NO	YES	NO	NO
3	170124001	170124524	Huvec combined segmentation T	rs12488537	170124354	rs12486850	170122676	1	0.988338461538462	1678	CLDN11	NO	NO	NO	NO	NO	YES
3	170128201	170129200	Gm12878 combined segmentation CTCF	rs13096001	170128750	rs12486850	170122676	1	0.932622222222222	6074	CLDN11	NO	NO	NO	NO	NO	YES
3	170128201	170128800	Huvec combined segmentation CTCF	rs13096001	170128750	rs12486850	170122676	1	0.932622222222222	6074	CLDN11	NO	NO	NO	NO	NO	YES
3	170143905	170146400	Huvec combined segmentation T	rs2422035	170145272	rs12486850	170122676	0.939417372794936	0.867041067851725	22596	CLDN11	NO	NO	NO	YES	NO	NO
3	170133110	170133422	Huvec combined segmentation T	rs35763188	170133401	rs12486850	170122676	0.988050949165573	0.95364945781003	10725	CLDN11	NO	NO	NO	NO	NO	YES
3	170095900	170096074	Gm12878 combined segmentation T	rs4582064	170095914	rs12486850	170122676	0.986964139049887	0.824881299637114	-26762	SKIL	NO	NO	NO	YES	NO	NO
3	170095601	170096400	H1hesc combined segmentation T	rs4582064	170095914	rs12486850	170122676	0.986964139049887	0.824881299637114	-26762	SKIL	NO	NO	NO	YES	NO	NO
3	170090271	170105933	Huvec combined segmentation T	rs4582064	170095914	rs12486850	170122676	0.986964139049887	0.824881299637114	-26762	SKIL	NO	NO	NO	YES	NO	NO
3	170126548	170126748	Gm12878 combined segmentation T	rs62293497	170126565	rs12486850	170122676	1	0.932622222222222	3889	CLDN11	NO	NO	NO	NO	NO	YES
3	170126401	170126600	Huvec combined segmentation T	rs62293497	170126565	rs12486850	170122676	1	0.932622222222222	3889	CLDN11	NO	NO	NO	NO	NO	YES
3	170122944	170123351	EncodeFaire.known	rs6444924	170123048	rs12486850	170122676	0.982297184650327	0.964907758971959	372	CLDN11	NO	NO	NO	NO	NO	YES
3	170122834	170123032	Huvec combined segmentation T	rs6762828	170122872	rs12486850	170122676	1	1	196	CLDN11	NO	NO	NO	NO	NO	YES
3	170119756	170121020	Huvec combined segmentation T	rs6768083	170120253	rs12486850	170122676	1	0.988294882485562	-2423	CLDN11	NO	NO	NO	NO	NO	YES
3	170149401	170156317	Huvec combined segmentation T	rs6770844	170150812	rs12486850	170122676	0.939417372794936	0.867041067851725	28136	CLDN11	NO	NO	NO	YES	YES	NO
3	170126548	170126748	Gm12878 combined segmentation T	rs7644073	170126670	rs12486850	170122676	0.993890714743464	0.947748983097762	3994	CLDN11	NO	NO	NO	NO	NO	YES
8	128513128	128513397	wgEncodeRegTfbsClustered	rs6981321	128513305	rs12547874	128525632	0.986227849926692	0.940518287208948	-12327	LOC727677	NO	NO	NO	NO	NO	YES
4	106101201	106112200	Gm12878 combined segmentation T	rs10010281	106106131	rs12647922	106063987	0.966455625201554	0.876150803959186	42144	TET2	NO	NO	NO	YES	NO	NO
4	106084868	106099927	Gm12878 combined segmentation T	rs10022109	106087822	rs12647922	106063987	0.984258431073758	0.968764659139775	23835	TET2	NO	NO	NO	YES	NO	NO
4	106084868	106099927	Gm12878 combined segmentation T	rs12641113	106086302	rs12647922	106063987	0.984258431073758	0.968764659139775	22315	TET2	NO	NO	NO	YES	NO	NO
4	106085105	106086581	Huvec combined segmentation T	rs12641113	106086302	rs12647922	106063987	0.984258431073758	0.968764659139775	22315	TET2	NO	NO	NO	YES	NO	NO
4	106064681	106064955	Huvec combined segmentation T	rs17617028	106064683	rs12647922	106063987	1	1	696	TET2	NO	NO	NO	NO	NO	YES
4	106084868	106099927	Gm12878 combined segmentation T	rs35515350	106095243	rs12647922	106063987	0.95833812924176	0.868526685346673	31256	TET2	NO	NO	NO	YES	NO	NO
4	106066730	106069825	EncodeFaire.known	rs62331150	106069013	rs12647922	106063987	0.984140485995638	0.960941582429002	5026	TET2	NO	NO	NO	YES	NO	NO
4	106066576	106069437	Gm12878 combined segmentation TSS	rs62331150	106069013	rs12647922	106063987	0.984140485995638	0.960941582429002	5026	TET2	NO	NO	NO	YES	NO	NO
4	106068628	106069081	H1hesc combined segmentation enh	rs62331150	106069013	rs12647922	106063987	0.984140485995638	0.960941582429002	5026	TET2	NO	NO	NO	YES	NO	NO
4	106067416	106069045	Huvec combined segmentation TSS	rs62331150	106069013	rs12647922	106063987	0.984140485995638	0.960941582429002	5026	TET2	NO	NO	NO	YES	NO	NO
4	106068910	106069125	wgEncodeRegTfbsClustered	rs62331150	106069013	rs12647922	106063987	0.984140485995638	0.960941582429002	5026	TET2	NO	NO	NO	YES	NO	NO
4	106073401	106073526	Gm12878 combined segmentation PF	rs62331151	106073509	rs12647922	106063987	0.992115972701894	0.97661412088921	9522	TET2	NO	NO	NO	YES	NO	NO
4	106084766	106084857	Huvec combined segmentation T	rs9790517	106084778	rs12647922	106063987	0.984258431073758	0.968764659139775	20791	TET2	NO	NO	NO	YES	NO	NO
4	106122606	106135979	Gm12878 combined segmentation T	rs988799	106126413	rs12647922	106063987	0.95833812924176	0.868526685346674	62426	TET2	NO	NO	NO	YES	NO	NO
2	217924201	217924400	Gm12878 combined segmentation CTCF	rs13000023	217924394	rs12694403	217915414	1	0.828708306969176	8980	TNP1	NO	NO	NO	NO	NO	YES
2	217924201	217924600	H1hesc combined segmentation CTCF	rs13000023	217924394	rs12694403	217915414	1	0.828708306969176	8980	TNP1	NO	NO	NO	NO	NO	YES
2	217924195	217924458	wgEncodeRegTfbsClustered	rs13000023	217924394	rs12694403	217915414	1	0.828708306969176	8980	TNP1	NO	NO	NO	NO	NO	YES
2	217936181	217936450	EncodeDnaseI_only.known	rs12997141	217936386	rs13011060	217938177	1	0.992397954066794	-1791	TNP1	NO	NO	NO	NO	NO	YES
2	217941768	217942027	wgEncodeRegTfbsClustered	rs13000732	217941790	rs13011060	217938177	1	0.992397954066794	3613	TNP1	NO	NO	NO	NO	NO	YES
2	217936713	217936844	Huvec combined segmentation T	rs13002378	217936746	rs13011060	217938177	1	0.992397954066794	-1431	TNP1	NO	NO	NO	NO	NO	YES
2	217933210	217934601	EncodeFaire.known	rs13025492	217933312	rs13011060	217938177	0.99234366397297	0.984745947427298	-4865	TNP1	NO	NO	NO	NO	NO	YES
2	217929001	217929450	EncodeDnaseI_only.known	rs13034362	217929007	rs13011060	217938177	0.984398046171288	0.926109533698261	-9170	TNP1	NO	NO	NO	NO	NO	YES
2	217928995	217929400	Gm12878 combined segmentation WE	rs13034362	217929007	rs13011060	217938177	0.984398046171288	0.926109533698261	-9170	TNP1	NO	NO	NO	NO	NO	YES
2	217928908	217929614	H1hesc combined segmentation WE	rs13034362	217929007	rs13011060	217938177	0.984398046171288	0.926109533698261	-9170	TNP1	NO	NO	NO	NO	NO	YES
2	217932551	217932730	Huvec combined segmentation T	rs34293445	217932640	rs13011060	217938177	1	0.992365643380872	-5537	TNP1	NO	NO	NO	NO	NO	YES
2	217939601	217940210	EncodeDnaseI_only.known	rs35607529	217939897	rs13011060	217938177	1	0.992365643380872	1720	TNP1	NO	NO	NO	NO	NO	YES
2	217932551	217932730	Huvec combined segmentation T	rs36013968	217932679	rs13011060	217938177	1	0.992365643380872	-5498	TNP1	NO	NO	NO	NO	NO	YES
8	128537559	128538621	EncodeFaire.known	rs12542685	128537583	rs13256658	128539461	0.994235220357804	0.945416509257484	-1878	LOC727677	NO	NO	NO	NO	NO	YES
4	106101201	106112200	Gm12878 combined segmentation T	rs116001054	106107109	rs143875052	106150555	1	0.913321898227559	-43446	TET2	NO	NO	NO	YES	NO	NO
4	106077937	106078097	Huvec combined segmentation T	rs11728350	106078097	rs143875052	106150555	0.963444718077426	0.837848710340257	-72458	TET2	NO	NO	NO	YES	NO	NO
4	106064681	106064955	Huvec combined segmentation T	rs17035310	106064754	rs143875052	106150555	0.975377158420429	0.848594350286823	-85801	TET2	NO	NO	NO	NO	NO	YES
4	106115450	106117015	Gm12878 combined segmentation enh	rs17430251	106115708	rs143875052	106150555	1	0.913321898227559	-34847	TET2	NO	NO	NO	YES	NO	NO
4	106115059	106116475	Huvec combined segmentation enh	rs17430251	106115708	rs143875052	106150555	1	0.913321898227559	-34847	TET2	NO	NO	NO	YES	NO	NO
4	106115463	106115842	wgEncodeRegTfbsClustered	rs17430251	106115708	rs143875052	106150555	1	0.913321898227559	-34847	TET2	NO	NO	NO	YES	NO	NO
4	106101201	106112200	Gm12878 combined segmentation T	rs17508261	106108902	rs143875052	106150555	1	0.913321898227559	-41653	TET2	NO	NO	NO	YES	NO	NO
4	106180228	106202618	Gm12878 combined segmentation T	rs34402524	106196829	rs143875052	106150555	0.942933440796156	0.860002534993675	46274	TET2	NO	NO	YES	NO	NO	NO
4	106183601	106198000	Huvec combined segmentation T	rs34402524	106196829	rs143875052	106150555	0.942933440796156	0.860002534993675	46274	TET2	NO	NO	YES	NO	NO	NO
4	106084434	106084775	Gm12878 combined segmentation T	rs6825684	106084643	rs143875052	106150555	0.963444718077426	0.837848710340257	-65912	TET2	NO	NO	NO	YES	NO	NO
4	106122606	106135979	Gm12878 combined segmentation T	rs75321784	106125022	rs143875052	106150555	1	0.913321898227559	-25533	TET2	NO	NO	NO	YES	NO	NO
4	106138601	106156865	Gm12878 combined segmentation T	rs75625682	106152037	rs143875052	106150555	1	0.913321898227559	1482	TET2	NO	NO	NO	YES	NO	NO
4	106152016	106152107	Huvec combined segmentation T	rs75625682	106152037	rs143875052	106150555	1	0.913321898227559	1482	TET2	NO	NO	NO	YES	NO	NO
4	106122606	106135979	Gm12878 combined segmentation T	rs78632895	106123638	rs143875052	106150555	1	0.913321898227559	-26917	TET2	NO	NO	NO	YES	NO	NO
3	169862603	169870313	Gm12878 combined segmentation T	rs113687726	169867464	rs17236830	169891246	1	0.974859038142621	-23782	PHC3	NO	NO	NO	YES	NO	NO
3	169835401	169868325	Huvec combined segmentation T	rs113687726	169867464	rs17236830	169891246	1	0.974859038142621	-23782	PHC3	NO	NO	NO	YES	NO	NO
3	169877866	169887717	Gm12878 combined segmentation T	rs12488988	169879860	rs17236830	169891246	1	0.987288277712559	-11386	PHC3	NO	NO	NO	YES	NO	NO
3	169878353	169884800	H1hesc combined segmentation T	rs12488988	169879860	rs17236830	169891246	1	0.987288277712559	-11386	PHC3	NO	NO	NO	YES	NO	NO
3	169869179	169896800	Huvec combined segmentation T	rs12488988	169879860	rs17236830	169891246	1	0.987288277712559	-11386	PHC3	NO	NO	NO	YES	NO	NO
3	169802001	169814423	Gm12878 combined segmentation T	rs12492606	169808354	rs17236830	169891246	0.987126550949783	0.974418827590015	-82892	GPR160	NO	NO	NO	NO	YES	NO
3	169797346	169827200	Huvec combined segmentation T	rs12492606	169808354	rs17236830	169891246	0.987126550949783	0.974418827590015	-82892	GPR160	NO	NO	NO	NO	YES	NO
3	169796536	169801000	Gm12878 combined segmentation T	rs12493804	169799704	rs17236830	169891246	1	0.987288277712559	-91542	GPR160	NO	NO	NO	YES	NO	NO
3	169797346	169827200	Huvec combined segmentation T	rs12493804	169799704	rs17236830	169891246	1	0.987288277712559	-91542	GPR160	NO	NO	NO	YES	NO	NO
3	169796536	169801000	Gm12878 combined segmentation T	rs12497114	169799521	rs17236830	169891246	1	0.987288277712559	-91725	GPR160	NO	NO	NO	YES	NO	NO
3	169797346	169827200	Huvec combined segmentation T	rs12497114	169799521	rs17236830	169891246	1	0.987288277712559	-91725	GPR160	NO	NO	NO	YES	NO	NO
3	169802001	169814423	Gm12878 combined segmentation T	rs16854836	169804730	rs17236830	169891246	0.987126550949783	0.974418827590015	-86516	GPR160	NO	NO	NO	NO	NO	YES
3	169803298	169804833	H1hesc combined segmentation T	rs16854836	169804730	rs17236830	169891246	0.987126550949783	0.974418827590015	-86516	GPR160	NO	NO	NO	NO	NO	YES
3	169797346	169827200	Huvec combined segmentation T	rs16854836	169804730	rs17236830	169891246	0.987126550949783	0.974418827590015	-86516	GPR160	NO	NO	NO	NO	NO	YES
3	169814516	169845200	Gm12878 combined segmentation T	rs16854848	169822201	rs17236830	169891246	0.973886968904079	0.936280487499094	-69045	GPR160	NO	NO	NO	YES	NO	NO
3	169822085	169822257	H1hesc combined segmentation T	rs16854848	169822201	rs17236830	169891246	0.973886968904079	0.936280487499094	-69045	GPR160	NO	NO	NO	YES	NO	NO
3	169797346	169827200	Huvec combined segmentation T	rs16854848	169822201	rs17236830	169891246	0.973886968904079	0.936280487499094	-69045	GPR160	NO	NO	NO	YES	NO	NO
3	169899222	169899685	EncodeFaire.known	rs16854875	169899667	rs17236830	169891246	1	1	8421	PHC3	YES	NO	NO	NO	NO	YES
3	169897536	169899725	Gm12878 combined segmentation TSS	rs16854875	169899667	rs17236830	169891246	1	1	8421	PHC3	YES	NO	NO	NO	NO	YES
3	169898442	169899672	H1hesc combined segmentation TSS	rs16854875	169899667	rs17236830	169891246	1	1	8421	PHC3	YES	NO	NO	NO	NO	YES
3	169898215	169899700	Huvec combined segmentation TSS	rs16854875	169899667	rs17236830	169891246	1	1	8421	PHC3	YES	NO	NO	NO	NO	YES
3	169899357	169899806	wgEncodeRegTfbsClustered	rs16854875	169899667	rs17236830	169891246	1	1	8421	PHC3	YES	NO	NO	NO	NO	YES
3	169798921	169799250	EncodeDnaseI_only.known	rs2241292	169798962	rs17236830	169891246	1	0.987288277712559	-92284	GPR160	NO	NO	NO	YES	NO	NO
3	169796536	169801000	Gm12878 combined segmentation T	rs2241292	169798962	rs17236830	169891246	1	0.987288277712559	-92284	GPR160	NO	NO	NO	YES	NO	NO
3	169797346	169827200	Huvec combined segmentation T	rs2241292	169798962	rs17236830	169891246	1	0.987288277712559	-92284	GPR160	NO	NO	NO	YES	NO	NO
3	169886201	169897369	H1hesc combined segmentation T	rs3772186	169889331	rs17236830	169891246	1	1	-1915	PHC3	NO	NO	NO	YES	NO	NO
3	169869179	169896800	Huvec combined segmentation T	rs3772186	169889331	rs17236830	169891246	1	1	-1915	PHC3	NO	NO	NO	YES	NO	NO
3	169814516	169845200	Gm12878 combined segmentation T	rs56241439	169830174	rs17236830	169891246	0.987053056074725	0.949779556683439	-61072	PHC3	NO	NO	NO	YES	NO	NO
3	169829777	169834200	H1hesc combined segmentation T	rs56241439	169830174	rs17236830	169891246	0.987053056074725	0.949779556683439	-61072	PHC3	NO	NO	NO	YES	NO	NO
3	169828601	169834800	Huvec combined segmentation T	rs56241439	169830174	rs17236830	169891246	0.987053056074725	0.949779556683439	-61072	PHC3	NO	NO	NO	YES	NO	NO
3	169874001	169876753	Gm12878 combined segmentation T	rs57150274	169874634	rs17236830	169891246	1	1	-16612	PHC3	NO	NO	NO	YES	NO	NO
3	169869179	169896800	Huvec combined segmentation T	rs57150274	169874634	rs17236830	169891246	1	1	-16612	PHC3	NO	NO	NO	YES	NO	NO
3	169814516	169845200	Gm12878 combined segmentation T	rs58417766	169833247	rs17236830	169891246	0.987126550949783	0.974418827590015	-57999	PHC3	NO	NO	NO	YES	NO	NO
3	169829777	169834200	H1hesc combined segmentation T	rs58417766	169833247	rs17236830	169891246	0.987126550949783	0.974418827590015	-57999	PHC3	NO	NO	NO	YES	NO	NO
3	169828601	169834800	Huvec combined segmentation T	rs58417766	169833247	rs17236830	169891246	0.987126550949783	0.974418827590015	-57999	PHC3	NO	NO	NO	YES	NO	NO
3	169886201	169897369	H1hesc combined segmentation T	rs61493476	169887831	rs17236830	169891246	0.960833487333898	0.877789806040252	-3415	PHC3	NO	NO	NO	YES	YES	NO
3	169869179	169896800	Huvec combined segmentation T	rs61493476	169887831	rs17236830	169891246	0.960833487333898	0.877789806040252	-3415	PHC3	NO	NO	NO	YES	YES	NO
3	169887787	169888030	wgEncodeRegTfbsClustered	rs61493476	169887831	rs17236830	169891246	0.960833487333898	0.877789806040252	-3415	PHC3	NO	NO	NO	YES	YES	NO
3	169876201	169877200	H1hesc combined segmentation T	rs6763396	169876765	rs17236830	169891246	1	1	-14481	PHC3	NO	NO	NO	YES	NO	NO
3	169869179	169896800	Huvec combined segmentation T	rs6763396	169876765	rs17236830	169891246	1	1	-14481	PHC3	NO	NO	NO	YES	NO	NO
3	169814516	169845200	Gm12878 combined segmentation T	rs6781454	169823096	rs17236830	169891246	0.987126550949783	0.974418827590015	-68150	GPR160	NO	NO	NO	YES	NO	NO
3	169797346	169827200	Huvec combined segmentation T	rs6781454	169823096	rs17236830	169891246	0.987126550949783	0.974418827590015	-68150	GPR160	NO	NO	NO	YES	NO	NO
3	169814516	169845200	Gm12878 combined segmentation T	rs6785202	169830459	rs17236830	169891246	0.987126550949783	0.974418827590015	-60787	PHC3	NO	NO	NO	YES	NO	NO
3	169829777	169834200	H1hesc combined segmentation T	rs6785202	169830459	rs17236830	169891246	0.987126550949783	0.974418827590015	-60787	PHC3	NO	NO	NO	YES	NO	NO
3	169828601	169834800	Huvec combined segmentation T	rs6785202	169830459	rs17236830	169891246	0.987126550949783	0.974418827590015	-60787	PHC3	NO	NO	NO	YES	NO	NO
3	169862603	169870313	Gm12878 combined segmentation T	rs6786022	169864154	rs17236830	169891246	1	1	-27092	PHC3	NO	NO	NO	YES	NO	NO
3	169835401	169868325	Huvec combined segmentation T	rs6786022	169864154	rs17236830	169891246	1	1	-27092	PHC3	NO	NO	NO	YES	NO	NO
3	169814516	169845200	Gm12878 combined segmentation T	rs6808506	169839239	rs17236830	169891246	1	0.987162986045252	-52007	PHC3	NO	NO	NO	YES	NO	NO
3	169837756	169841800	H1hesc combined segmentation T	rs6808506	169839239	rs17236830	169891246	1	0.987162986045252	-52007	PHC3	NO	NO	NO	YES	NO	NO
3	169835401	169868325	Huvec combined segmentation T	rs6808506	169839239	rs17236830	169891246	1	0.987162986045252	-52007	PHC3	NO	NO	NO	YES	NO	NO
3	169862603	169870313	Gm12878 combined segmentation T	rs6809214	169864096	rs17236830	169891246	1	1	-27150	PHC3	NO	NO	NO	YES	NO	NO
3	169835401	169868325	Huvec combined segmentation T	rs6809214	169864096	rs17236830	169891246	1	1	-27150	PHC3	NO	NO	NO	YES	NO	NO
3	169814516	169845200	Gm12878 combined segmentation T	rs73030653	169841926	rs17236830	169891246	1	1	-49320	PHC3	NO	NO	NO	YES	NO	NO
3	169835401	169868325	Huvec combined segmentation T	rs73030653	169841926	rs17236830	169891246	1	1	-49320	PHC3	NO	NO	NO	YES	NO	NO
3	169845001	169847282	H1hesc combined segmentation T	rs73879173	169845604	rs17236830	169891246	1	0.987288277712559	-45642	PHC3	NO	NO	NO	YES	NO	NO
3	169835401	169868325	Huvec combined segmentation T	rs73879173	169845604	rs17236830	169891246	1	0.987288277712559	-45642	PHC3	NO	NO	NO	YES	NO	NO
3	169872239	169873031	EncodeFaire.known	rs73879178	169872834	rs17236830	169891246	1	1	-18412	PHC3	NO	NO	NO	YES	NO	NO
3	169871801	169873486	Gm12878 combined segmentation enh	rs73879178	169872834	rs17236830	169891246	1	1	-18412	PHC3	NO	NO	NO	YES	NO	NO
3	169869179	169896800	Huvec combined segmentation T	rs73879178	169872834	rs17236830	169891246	1	1	-18412	PHC3	NO	NO	NO	YES	NO	NO
3	169872424	169872873	wgEncodeRegTfbsClustered	rs73879178	169872834	rs17236830	169891246	1	1	-18412	PHC3	NO	NO	NO	YES	NO	NO
3	169874001	169876753	Gm12878 combined segmentation T	rs73879180	169874968	rs17236830	169891246	1	0.987288277712559	-16278	PHC3	NO	NO	NO	YES	NO	NO
3	169869179	169896800	Huvec combined segmentation T	rs73879180	169874968	rs17236830	169891246	1	0.987288277712559	-16278	PHC3	NO	NO	NO	YES	NO	NO
3	169877866	169887717	Gm12878 combined segmentation T	rs73879182	169879695	rs17236830	169891246	1	1	-11551	PHC3	NO	NO	NO	YES	NO	NO
3	169878353	169884800	H1hesc combined segmentation T	rs73879182	169879695	rs17236830	169891246	1	1	-11551	PHC3	NO	NO	NO	YES	NO	NO
3	169869179	169896800	Huvec combined segmentation T	rs73879182	169879695	rs17236830	169891246	1	1	-11551	PHC3	NO	NO	NO	YES	NO	NO
3	169877866	169887717	Gm12878 combined segmentation T	rs74643988	169883365	rs17236830	169891246	0.999999999999999	0.974364177489177	-7881	PHC3	NO	NO	NO	YES	NO	NO
3	169878353	169884800	H1hesc combined segmentation T	rs74643988	169883365	rs17236830	169891246	0.999999999999999	0.974364177489177	-7881	PHC3	NO	NO	NO	YES	NO	NO
3	169869179	169896800	Huvec combined segmentation T	rs74643988	169883365	rs17236830	169891246	0.999999999999999	0.974364177489177	-7881	PHC3	NO	NO	NO	YES	NO	NO
3	169862603	169870313	Gm12878 combined segmentation T	rs76146702	169868720	rs17236830	169891246	1	1	-22526	PHC3	NO	NO	NO	YES	NO	NO
3	169868606	169868780	Huvec combined segmentation T	rs76146702	169868720	rs17236830	169891246	1	1	-22526	PHC3	NO	NO	NO	YES	NO	NO
3	169802001	169814423	Gm12878 combined segmentation T	rs7615039	169806170	rs17236830	169891246	0.987126550949783	0.974418827590015	-85076	GPR160	NO	NO	NO	NO	YES	NO
3	169797346	169827200	Huvec combined segmentation T	rs7615039	169806170	rs17236830	169891246	0.987126550949783	0.974418827590015	-85076	GPR160	NO	NO	NO	NO	YES	NO
3	169805268	169806367	knownGene.Promoters.known	rs7615039	169806170	rs17236830	169891246	0.987126550949783	0.974418827590015	-85076	GPR160	NO	NO	NO	NO	YES	NO
3	169849001	169862193	Gm12878 combined segmentation T	rs7618919	169860239	rs17236830	169891246	1	1	-31007	PHC3	YES	NO	NO	YES	NO	NO
3	169835401	169868325	Huvec combined segmentation T	rs7618919	169860239	rs17236830	169891246	1	1	-31007	PHC3	YES	NO	NO	YES	NO	NO
3	169814516	169845200	Gm12878 combined segmentation T	rs7638400	169837787	rs17236830	169891246	1	1	-53459	PHC3	NO	NO	NO	YES	NO	NO
3	169837756	169841800	H1hesc combined segmentation T	rs7638400	169837787	rs17236830	169891246	1	1	-53459	PHC3	NO	NO	NO	YES	NO	NO
3	169835401	169868325	Huvec combined segmentation T	rs7638400	169837787	rs17236830	169891246	1	1	-53459	PHC3	NO	NO	NO	YES	NO	NO
3	169877866	169887717	Gm12878 combined segmentation T	rs76646441	169885103	rs17236830	169891246	1	0.987288277712559	-6143	PHC3	NO	NO	NO	YES	NO	NO
3	169869179	169896800	Huvec combined segmentation T	rs76646441	169885103	rs17236830	169891246	1	0.987288277712559	-6143	PHC3	NO	NO	NO	YES	NO	NO
3	169849001	169862193	Gm12878 combined segmentation T	rs79389383	169858228	rs17236830	169891246	1	1	-33018	PHC3	NO	NO	NO	YES	NO	NO
3	169835401	169868325	Huvec combined segmentation T	rs79389383	169858228	rs17236830	169891246	1	1	-33018	PHC3	NO	NO	NO	YES	NO	NO
3	169886201	169897369	H1hesc combined segmentation T	rs79518241	169890738	rs17236830	169891246	1	1	-508	PHC3	NO	NO	NO	YES	NO	NO
3	169869179	169896800	Huvec combined segmentation T	rs79518241	169890738	rs17236830	169891246	1	1	-508	PHC3	NO	NO	NO	YES	NO	NO
3	169814516	169845200	Gm12878 combined segmentation T	rs80038349	169844718	rs17236830	169891246	0.999999999999999	0.974364177489177	-46528	PHC3	NO	NO	NO	YES	NO	NO
3	169835401	169868325	Huvec combined segmentation T	rs80038349	169844718	rs17236830	169891246	0.999999999999999	0.974364177489177	-46528	PHC3	NO	NO	NO	YES	NO	NO
3	169802001	169814423	Gm12878 combined segmentation T	rs879161	169812115	rs17236830	169891246	0.987126550949783	0.974418827590015	-79131	GPR160	NO	NO	NO	NO	YES	NO
3	169811722	169820800	H1hesc combined segmentation T	rs879161	169812115	rs17236830	169891246	0.987126550949783	0.974418827590015	-79131	GPR160	NO	NO	NO	NO	YES	NO
3	169797346	169827200	Huvec combined segmentation T	rs879161	169812115	rs17236830	169891246	0.987126550949783	0.974418827590015	-79131	GPR160	NO	NO	NO	NO	YES	NO
3	169802001	169814423	Gm12878 combined segmentation T	rs888507	169811039	rs17236830	169891246	0.987126550949783	0.974418827590015	-80207	GPR160	NO	NO	NO	NO	YES	NO
3	169811010	169811239	H1hesc combined segmentation T	rs888507	169811039	rs17236830	169891246	0.987126550949783	0.974418827590015	-80207	GPR160	NO	NO	NO	NO	YES	NO
3	169797346	169827200	Huvec combined segmentation T	rs888507	169811039	rs17236830	169891246	0.987126550949783	0.974418827590015	-80207	GPR160	NO	NO	NO	NO	YES	NO
4	106065256	106065350	Gm12878 combined segmentation PF	rs10007915	106065308	rs2047409	106137033	0.958237456789347	0.853946692274616	-71725	TET2	YES	NO	NO	NO	NO	YES
4	106138601	106156865	Gm12878 combined segmentation T	rs11097882	106142960	rs2047409	106137033	1	0.983284082388744	5927	TET2	NO	NO	NO	YES	NO	NO
4	106137805	106138395	EncodeFaire.known	rs11735256	106138146	rs2047409	106137033	1	0.994388925901251	1113	TET2	NO	NO	NO	YES	NO	NO
4	106138065	106138546	Huvec combined segmentation T	rs11735256	106138146	rs2047409	106137033	1	0.994388925901251	1113	TET2	NO	NO	NO	YES	NO	NO
4	106138601	106156865	Gm12878 combined segmentation T	rs13147502	106143797	rs2047409	106137033	1	0.904686059183502	6764	TET2	NO	NO	NO	YES	NO	NO
4	106138601	106156865	Gm12878 combined segmentation T	rs1391439	106151642	rs2047409	106137033	1	0.994388925901251	14609	TET2	NO	NO	NO	YES	NO	NO
4	106150936	106151915	Huvec combined segmentation T	rs1391439	106151642	rs2047409	106137033	1	0.994388925901251	14609	TET2	NO	NO	NO	YES	NO	NO
4	106122606	106135979	Gm12878 combined segmentation T	rs2007403	106131210	rs2047409	106137033	1	1	-5823	TET2	NO	NO	NO	YES	NO	NO
4	106130939	106131377	Huvec combined segmentation T	rs2007403	106131210	rs2047409	106137033	1	1	-5823	TET2	NO	NO	NO	YES	NO	NO
4	106122606	106135979	Gm12878 combined segmentation T	rs6533183	106133184	rs2047409	106137033	1	0.918128402315735	-3849	TET2	NO	NO	NO	YES	NO	NO
4	106133138	106133256	Huvec combined segmentation T	rs6533183	106133184	rs2047409	106137033	1	0.918128402315735	-3849	TET2	NO	NO	NO	YES	NO	NO
4	106138601	106156865	Gm12878 combined segmentation T	rs6839705	106144735	rs2047409	106137033	0.987930660215896	0.906469631660469	7702	TET2	NO	NO	NO	YES	NO	NO
4	106144608	106145925	Huvec combined segmentation T	rs6839705	106144735	rs2047409	106137033	0.987930660215896	0.906469631660469	7702	TET2	NO	NO	NO	YES	NO	NO
4	106122606	106135979	Gm12878 combined segmentation T	rs7663401	106128954	rs2047409	106137033	1	0.950266818301111	-8079	TET2	NO	NO	NO	YES	NO	NO
4	106128698	106129146	Huvec combined segmentation T	rs7663401	106128954	rs2047409	106137033	1	0.950266818301111	-8079	TET2	NO	NO	NO	YES	NO	NO
4	106138601	106156865	Gm12878 combined segmentation T	rs7674220	106148758	rs2047409	106137033	0.994036440871637	0.928293953106728	11725	TET2	NO	NO	NO	YES	NO	NO
4	106147806	106148901	Huvec combined segmentation T	rs7674220	106148758	rs2047409	106137033	0.994036440871637	0.928293953106728	11725	TET2	NO	NO	NO	YES	NO	NO
17	36078011	36095000	Gm12878 combined segmentation T	rs8066151	36083304	rs2107132	36084202	0.988304971540459	0.89961371100903	-898	HNF1B	NO	NO	NO	YES	NO	NO
17	36078011	36095000	Gm12878 combined segmentation T	rs9914818	36083713	rs2107132	36084202	1	0.910888898109345	-489	HNF1B	NO	NO	NO	YES	NO	NO
6	31408131	31408371	H1hesc combined segmentation T	rs114070419	31408329	rs2523607	31322790	0.982713354982703	0.837255906988964	85539	HCP5	NO	NO	NO	NO	NO	YES
6	31316896	31316991	Gm12878 combined segmentation T	rs114465837	31316911	rs2523607	31322790	1	0.881581002968286	-5879	MICA	NO	NO	NO	YES	NO	NO
6	31312801	31313200	Gm12878 combined segmentation CTCF	rs114528009	31312941	rs2523607	31322790	0.951286858868943	0.837678262269773	-9849	MICA	NO	NO	NO	YES	NO	NO
6	31312801	31313200	Huvec combined segmentation CTCF	rs114528009	31312941	rs2523607	31322790	0.951286858868943	0.837678262269773	-9849	MICA	NO	NO	NO	YES	NO	NO
6	31312844	31313201	wgEncodeRegTfbsClustered	rs114528009	31312941	rs2523607	31322790	0.951286858868943	0.837678262269773	-9849	MICA	NO	NO	NO	YES	NO	NO
6	31317195	31318400	Gm12878 combined segmentation T	rs114696995	31318308	rs2523607	31322790	0.951278012529698	0.837662682633492	-4482	MICA	NO	NO	NO	YES	NO	NO
6	31318305	31319405	wgEncodeRegTfbsClustered	rs114696995	31318308	rs2523607	31322790	0.951278012529698	0.837662682633492	-4482	MICA	NO	NO	NO	YES	NO	NO
6	31376801	31385525	Gm12878 combined segmentation T	rs114815294	31377978	rs2523607	31322790	0.982998749893767	0.851859859109164	55188	MICA	NO	NO	NO	YES	NO	NO
6	31377201	31379800	H1hesc combined segmentation T	rs114815294	31377978	rs2523607	31322790	0.982998749893767	0.851859859109164	55188	MICA	NO	NO	NO	YES	NO	NO
6	31373601	31388600	Huvec combined segmentation T	rs114815294	31377978	rs2523607	31322790	0.982998749893767	0.851859859109164	55188	MICA	NO	NO	NO	YES	NO	NO
6	31385896	31386953	Gm12878 combined segmentation T	rs114831258	31386131	rs2523607	31322790	0.982998749893767	0.851859859109164	63341	MICA	NO	NO	NO	NO	NO	YES
6	31385949	31386400	H1hesc combined segmentation T	rs114831258	31386131	rs2523607	31322790	0.982998749893767	0.851859859109164	63341	MICA	NO	NO	NO	NO	NO	YES
6	31373601	31388600	Huvec combined segmentation T	rs114831258	31386131	rs2523607	31322790	0.982998749893767	0.851859859109164	63341	MICA	NO	NO	NO	NO	NO	YES
6	31334401	31334700	Gm12878 combined segmentation enh	rs114860307	31334422	rs2523607	31322790	0.951278012529698	0.837662682633492	11632	MICA	NO	NO	NO	NO	NO	YES
6	31334401	31334585	H1hesc combined segmentation enh	rs114860307	31334422	rs2523607	31322790	0.951278012529698	0.837662682633492	11632	MICA	NO	NO	NO	NO	NO	YES
6	31410328	31410635	EncodeFaire.known	rs115105023	31410521	rs2523607	31322790	0.982419033659915	0.822694173521227	87731	HCP5	NO	NO	NO	NO	NO	YES
6	31409201	31410800	Gm12878 combined segmentation CTCF	rs115105023	31410521	rs2523607	31322790	0.982419033659915	0.822694173521227	87731	HCP5	NO	NO	NO	NO	NO	YES
6	31410376	31410615	H1hesc combined segmentation CTCF	rs115105023	31410521	rs2523607	31322790	0.982419033659915	0.822694173521227	87731	HCP5	NO	NO	NO	NO	NO	YES
6	31409911	31410800	Huvec combined segmentation CTCF	rs115105023	31410521	rs2523607	31322790	0.982419033659915	0.822694173521227	87731	HCP5	NO	NO	NO	NO	NO	YES
6	31410336	31410599	wgEncodeRegTfbsClustered	rs115105023	31410521	rs2523607	31322790	0.982419033659915	0.822694173521227	87731	HCP5	NO	NO	NO	NO	NO	YES
6	31353408	31353507	Gm12878 combined segmentation T	rs115199198	31353435	rs2523607	31322790	1	0.881581002968286	30645	MICA	NO	NO	NO	NO	NO	YES
6	31308604	31308738	Gm12878 combined segmentation T	rs115384845	31308717	rs2523607	31322790	0.966503792913445	0.837198155256468	-14073	MICA	NO	NO	NO	YES	NO	NO
6	31360600	31360845	Gm12878 combined segmentation T	rs115623374	31360663	rs2523607	31322790	0.967042069494708	0.851873168397891	37873	MICA	NO	NO	NO	NO	NO	YES
6	31306396	31306487	Gm12878 combined segmentation T	rs115632882	31306420	rs2523607	31322790	0.951286858868943	0.837678262269773	-16370	MICA	NO	NO	NO	YES	NO	NO
6	31316551	31316744	Gm12878 combined segmentation T	rs115719777	31316695	rs2523607	31322790	1	0.881581002968286	-6095	MICA	NO	NO	NO	YES	NO	NO
6	31308030	31308479	wgEncodeRegTfbsClustered	rs115728574	31308476	rs2523607	31322790	0.951286858868943	0.837678262269773	-14314	MICA	NO	NO	NO	YES	NO	NO
6	31316138	31316397	wgEncodeRegTfbsClustered	rs115871695	31316234	rs2523607	31322790	0.967042069494708	0.851873168397891	-6556	MICA	NO	NO	NO	YES	NO	NO
6	31318305	31319405	wgEncodeRegTfbsClustered	rs116388453	31318432	rs2523607	31322790	0.951278012529698	0.837662682633492	-4358	MICA	NO	NO	NO	YES	NO	NO
6	31316551	31316744	Gm12878 combined segmentation T	rs116684188	31316613	rs2523607	31322790	0.967042069494708	0.851873168397891	-6177	MICA	NO	NO	NO	YES	NO	NO
6	31322238	31326385	Gm12878 combined segmentation TSS	rs140786044	31323506	rs2523607	31322790	1	1	716	MICA	YES	NO	NO	YES	YES	NO
6	31323428	31323593	H1hesc combined segmentation enh	rs140786044	31323506	rs2523607	31322790	1	1	716	MICA	YES	NO	NO	YES	YES	NO
6	31322230	31324168	wgEncodeRegTfbsClustered	rs140786044	31323506	rs2523607	31322790	1	1	716	MICA	YES	NO	NO	YES	YES	NO
6	31326601	31326842	Gm12878 combined segmentation WE	rs2523593	31326703	rs2523607	31322790	0.983278624835444	0.866511505999588	3913	MICA	YES	NO	NO	NO	NO	YES
6	31322238	31326385	Gm12878 combined segmentation TSS	rs2596495	31323416	rs2523607	31322790	1	1	626	MICA	YES	NO	NO	YES	YES	NO
6	31322230	31324168	wgEncodeRegTfbsClustered	rs2596495	31323416	rs2523607	31322790	1	1	626	MICA	YES	NO	NO	YES	YES	NO
6	31319001	31323400	H1hesc combined segmentation T	rs2596500	31321267	rs2523607	31322790	0.982998749893767	0.851859859109164	-1523	MICA	NO	NO	NO	YES	NO	NO
6	31319423	31322204	wgEncodeRegTfbsClustered	rs2596500	31321267	rs2523607	31322790	0.982998749893767	0.851859859109164	-1523	MICA	NO	NO	NO	YES	NO	NO
6	31325981	31326458	EncodeFaire.known	rs2853999	31326074	rs2523607	31322790	1	0.866970866970866	3284	MICA	YES	NO	NO	NO	NO	YES
6	31322238	31326385	Gm12878 combined segmentation TSS	rs2853999	31326074	rs2523607	31322790	1	0.866970866970866	3284	MICA	YES	NO	NO	NO	NO	YES
6	31326066	31326341	wgEncodeRegTfbsClustered	rs2853999	31326074	rs2523607	31322790	1	0.866970866970866	3284	MICA	YES	NO	NO	NO	NO	YES
3	127933154	127933401	Huvec combined segmentation T	rs11707297	127933203	rs2999052	127892037	1	0.986756471071276	41166	EEFSEC	NO	NO	NO	YES	NO	NO
3	127917654	127918032	Gm12878 combined segmentation T	rs2492285	127918000	rs2999052	127892037	1	1	25963	EEFSEC	NO	NO	NO	YES	NO	NO
3	127918499	127919039	Huvec combined segmentation T	rs2687720	127918955	rs2999052	127892037	0.993282969347692	0.980046237050496	26918	EEFSEC	NO	NO	NO	YES	NO	NO
3	127895162	127895396	Gm12878 combined segmentation T	rs2687729	127895226	rs2999052	127892037	1	1	3189	EEFSEC	NO	NO	NO	YES	NO	NO
3	127895108	127895307	Huvec combined segmentation T	rs2687729	127895226	rs2999052	127892037	1	1	3189	EEFSEC	NO	NO	NO	YES	NO	NO
3	127980557	127996033	Gm12878 combined segmentation T	rs2811413	127991149	rs2999052	127892037	1	0.819949734882153	99112	MIR1280	NO	NO	NO	YES	NO	NO
3	127898401	127898585	H1hesc combined segmentation PF	rs2811476	127898501	rs2999052	127892037	1	0.993325702210091	6464	EEFSEC	NO	NO	NO	YES	NO	NO
3	127898359	127898825	Huvec combined segmentation T	rs2811476	127898501	rs2999052	127892037	1	0.993325702210091	6464	EEFSEC	NO	NO	NO	YES	NO	NO
3	127901994	127902093	Gm12878 combined segmentation T	rs2811480	127902091	rs2999052	127892037	1	1	10054	EEFSEC	NO	NO	NO	YES	NO	NO
3	127901829	127902400	Huvec combined segmentation T	rs2811480	127902091	rs2999052	127892037	1	1	10054	EEFSEC	NO	NO	NO	YES	NO	NO
3	127904392	127904651	Gm12878 combined segmentation T	rs2811481	127904496	rs2999052	127892037	1	1	12459	EEFSEC	NO	NO	NO	YES	NO	NO
3	127904359	127904519	Huvec combined segmentation T	rs2811481	127904496	rs2999052	127892037	1	1	12459	EEFSEC	NO	NO	NO	YES	NO	NO
3	127916471	127917012	Gm12878 combined segmentation T	rs2811509	127916551	rs2999052	127892037	1	1	24514	EEFSEC	NO	NO	NO	YES	NO	NO
3	127916170	127916554	Huvec combined segmentation T	rs2811509	127916551	rs2999052	127892037	1	1	24514	EEFSEC	NO	NO	NO	YES	NO	NO
3	127911615	127912015	Gm12878 combined segmentation T	rs2811512	127911820	rs2999052	127892037	1	0.986756471071275	19783	EEFSEC	NO	NO	NO	YES	NO	NO
3	127907881	127908090	EncodeDnaseI_only.known	rs2811514	127907929	rs2999052	127892037	1	0.986756471071275	15892	EEFSEC	NO	NO	NO	YES	NO	NO
3	127907746	127907933	Gm12878 combined segmentation T	rs2811514	127907929	rs2999052	127892037	1	0.986756471071275	15892	EEFSEC	NO	NO	NO	YES	NO	NO
3	127905483	127905739	Huvec combined segmentation T	rs2811515	127905518	rs2999052	127892037	1	1	13481	EEFSEC	NO	NO	NO	YES	NO	NO
3	127864948	127865704	EncodeFaire.known	rs2955102	127865510	rs2999052	127892037	1	0.993346091047947	-26527	EEFSEC	NO	NO	NO	YES	NO	NO
3	127865114	127865749	Gm12878 combined segmentation T	rs2955102	127865510	rs2999052	127892037	1	0.993346091047947	-26527	EEFSEC	NO	NO	NO	YES	NO	NO
3	127865401	127865600	H1hesc combined segmentation CTCF	rs2955102	127865510	rs2999052	127892037	1	0.993346091047947	-26527	EEFSEC	NO	NO	NO	YES	NO	NO
3	127865484	127865679	wgEncodeRegTfbsClustered	rs2955102	127865510	rs2999052	127892037	1	0.993346091047947	-26527	EEFSEC	NO	NO	NO	YES	NO	NO
3	127880956	127881805	Gm12878 combined segmentation T	rs2955117	127881613	rs2999052	127892037	1	0.94851811289679	-10424	EEFSEC	NO	NO	NO	YES	NO	NO
3	127881926	127882243	Gm12878 combined segmentation T	rs2955118	127882064	rs2999052	127892037	1	0.980230212825149	-9973	EEFSEC	NO	NO	NO	YES	NO	NO
3	127887944	127888422	Gm12878 combined segmentation T	rs2955120	127888347	rs2999052	127892037	1	0.986756471071275	-3690	EEFSEC	NO	NO	NO	YES	NO	NO
3	127888254	127888570	Huvec combined segmentation T	rs2955120	127888347	rs2999052	127892037	1	0.986756471071275	-3690	EEFSEC	NO	NO	NO	YES	NO	NO
3	127864948	127865704	EncodeFaire.known	rs2999045	127865397	rs2999052	127892037	1	0.973766406811044	-26640	EEFSEC	NO	NO	NO	YES	NO	NO
3	127865114	127865749	Gm12878 combined segmentation T	rs2999045	127865397	rs2999052	127892037	1	0.973766406811044	-26640	EEFSEC	NO	NO	NO	YES	NO	NO
3	127865001	127865400	H1hesc combined segmentation T	rs2999045	127865397	rs2999052	127892037	1	0.973766406811044	-26640	EEFSEC	NO	NO	NO	YES	NO	NO
3	127876914	127879473	Gm12878 combined segmentation T	rs2999048	127878416	rs2999052	127892037	1	0.980230212825149	-13621	EEFSEC	NO	NO	NO	YES	NO	NO
3	127876914	127879473	Gm12878 combined segmentation T	rs2999049	127878817	rs2999052	127892037	1	0.993346091047947	-13220	EEFSEC	NO	NO	NO	YES	NO	NO
3	127878535	127878884	Huvec combined segmentation T	rs2999049	127878817	rs2999052	127892037	1	0.993346091047947	-13220	EEFSEC	NO	NO	NO	YES	NO	NO
3	127889201	127889403	Gm12878 combined segmentation T	rs3122173	127889287	rs2999052	127892037	1	0.940786390070306	-2750	EEFSEC	NO	NO	NO	YES	NO	NO
3	127889221	127889318	Huvec combined segmentation T	rs3122173	127889287	rs2999052	127892037	1	0.940786390070306	-2750	EEFSEC	NO	NO	NO	YES	NO	NO
3	127937644	127940200	Gm12878 combined segmentation T	rs4323023	127939357	rs2999052	127892037	1	1	47320	EEFSEC	NO	NO	NO	YES	NO	NO
3	127978685	127978883	Gm12878 combined segmentation T	rs4555544	127978795	rs2999052	127892037	1	0.986756471071276	86758	MIR1280	NO	NO	NO	YES	NO	NO
3	127978759	127979258	wgEncodeRegTfbsClustered	rs4555544	127978795	rs2999052	127892037	1	0.986756471071276	86758	MIR1280	NO	NO	NO	YES	NO	NO
3	127834370	127840600	Gm12878 combined segmentation T	rs4857836	127836287	rs2999052	127892037	0.986589996517111	0.973359821227633	-55750	RUVBL1	NO	NO	NO	YES	NO	NO
3	127834001	127837833	H1hesc combined segmentation T	rs4857836	127836287	rs2999052	127892037	0.986589996517111	0.973359821227633	-55750	RUVBL1	NO	NO	NO	YES	NO	NO
3	127832601	127839000	Huvec combined segmentation T	rs4857836	127836287	rs2999052	127892037	0.986589996517111	0.973359821227633	-55750	RUVBL1	NO	NO	NO	YES	NO	NO
3	127836144	127836363	wgEncodeRegTfbsClustered	rs4857836	127836287	rs2999052	127892037	0.986589996517111	0.973359821227633	-55750	RUVBL1	NO	NO	NO	YES	NO	NO
3	127834370	127840600	Gm12878 combined segmentation T	rs4857837	127836319	rs2999052	127892037	1	0.986756471071276	-55718	RUVBL1	NO	NO	NO	YES	NO	NO
3	127834001	127837833	H1hesc combined segmentation T	rs4857837	127836319	rs2999052	127892037	1	0.986756471071276	-55718	RUVBL1	NO	NO	NO	YES	NO	NO
3	127832601	127839000	Huvec combined segmentation T	rs4857837	127836319	rs2999052	127892037	1	0.986756471071276	-55718	RUVBL1	NO	NO	NO	YES	NO	NO
3	127836144	127836363	wgEncodeRegTfbsClustered	rs4857837	127836319	rs2999052	127892037	1	0.986756471071276	-55718	RUVBL1	NO	NO	NO	YES	NO	NO
3	127943282	127943439	Gm12878 combined segmentation T	rs4857838	127943328	rs2999052	127892037	1	1	51291	EEFSEC	NO	NO	NO	YES	NO	NO
3	127943286	127943478	Huvec combined segmentation T	rs4857838	127943328	rs2999052	127892037	1	1	51291	EEFSEC	NO	NO	NO	YES	NO	NO
3	127814401	127831873	Gm12878 combined segmentation T	rs4857866	127819062	rs2999052	127892037	1	0.986756471071276	-72975	RUVBL1	NO	NO	NO	YES	NO	NO
3	127817876	127820589	H1hesc combined segmentation T	rs4857866	127819062	rs2999052	127892037	1	0.986756471071276	-72975	RUVBL1	NO	NO	NO	YES	NO	NO
3	127819013	127819105	Huvec combined segmentation T	rs4857866	127819062	rs2999052	127892037	1	0.986756471071276	-72975	RUVBL1	NO	NO	NO	YES	NO	NO
3	127933601	127933800	H1hesc combined segmentation T	rs4857871	127933786	rs2999052	127892037	1	1	41749	EEFSEC	NO	NO	NO	YES	NO	NO
3	127933498	127934149	Huvec combined segmentation T	rs4857871	127933786	rs2999052	127892037	1	1	41749	EEFSEC	NO	NO	NO	YES	NO	NO
3	127933498	127934149	Huvec combined segmentation T	rs4857872	127933822	rs2999052	127892037	1	1	41785	EEFSEC	NO	NO	NO	YES	NO	NO
3	127933974	127934478	Gm12878 combined segmentation T	rs4857873	127934218	rs2999052	127892037	1	1	42181	EEFSEC	NO	NO	NO	YES	NO	NO
3	127934200	127934455	wgEncodeRegTfbsClustered	rs4857873	127934218	rs2999052	127892037	1	1	42181	EEFSEC	NO	NO	NO	YES	NO	NO
3	127933974	127934478	Gm12878 combined segmentation T	rs4857874	127934269	rs2999052	127892037	1	1	42232	EEFSEC	NO	NO	NO	YES	NO	NO
3	127934200	127934455	wgEncodeRegTfbsClustered	rs4857874	127934269	rs2999052	127892037	1	1	42232	EEFSEC	NO	NO	NO	YES	NO	NO
3	127933974	127934478	Gm12878 combined segmentation T	rs4857875	127934276	rs2999052	127892037	1	1	42239	EEFSEC	NO	NO	NO	YES	NO	NO
3	127934200	127934455	wgEncodeRegTfbsClustered	rs4857875	127934276	rs2999052	127892037	1	1	42239	EEFSEC	NO	NO	NO	YES	NO	NO
3	127947806	127948070	Huvec combined segmentation T	rs4857877	127948060	rs2999052	127892037	1	0.993325702210091	56023	EEFSEC	NO	NO	NO	YES	NO	NO
3	127948116	127948299	Gm12878 combined segmentation T	rs4857878	127948149	rs2999052	127892037	1	1	56112	EEFSEC	NO	NO	NO	YES	NO	NO
3	127922852	127923329	Huvec combined segmentation T	rs6439119	127923187	rs2999052	127892037	1	1	31150	EEFSEC	NO	NO	NO	YES	NO	NO
3	127935270	127935713	Gm12878 combined segmentation T	rs6439121	127935461	rs2999052	127892037	1	1	43424	EEFSEC	NO	NO	NO	YES	NO	NO
3	127941370	127941603	Huvec combined segmentation T	rs6439123	127941439	rs2999052	127892037	1	1	49402	EEFSEC	NO	NO	NO	YES	NO	NO
3	127933974	127934478	Gm12878 combined segmentation T	rs6770140	127934329	rs2999052	127892037	1	1	42292	EEFSEC	NO	NO	NO	YES	NO	NO
3	127934200	127934455	wgEncodeRegTfbsClustered	rs6770140	127934329	rs2999052	127892037	1	1	42292	EEFSEC	NO	NO	NO	YES	NO	NO
3	127943804	127945400	Gm12878 combined segmentation T	rs6775988	127944477	rs2999052	127892037	1	1	52440	EEFSEC	NO	NO	NO	YES	NO	NO
3	127943804	127945400	Gm12878 combined segmentation T	rs6777054	127945349	rs2999052	127892037	1	1	53312	EEFSEC	NO	NO	NO	YES	NO	NO
3	127945174	127945698	H1hesc combined segmentation WE	rs6777054	127945349	rs2999052	127892037	1	1	53312	EEFSEC	NO	NO	NO	YES	NO	NO
3	127796201	127814000	Gm12878 combined segmentation T	rs7355887	127808502	rs2999052	127892037	1	0.973766406811044	-83535	RUVBL1	NO	NO	NO	YES	NO	NO
3	127808498	127809073	Huvec combined segmentation T	rs7355887	127808502	rs2999052	127892037	1	0.973766406811044	-83535	RUVBL1	NO	NO	NO	YES	NO	NO
3	127940211	127940443	Huvec combined segmentation T	rs7372902	127940440	rs2999052	127892037	1	1	48403	EEFSEC	NO	NO	NO	YES	NO	NO
3	127930681	127931358	Gm12878 combined segmentation T	rs7374072	127930866	rs2999052	127892037	1	1	38829	EEFSEC	NO	NO	NO	YES	NO	NO
3	127930826	127930925	Huvec combined segmentation T	rs7374072	127930866	rs2999052	127892037	1	1	38829	EEFSEC	NO	NO	NO	YES	NO	NO
3	127814401	127831873	Gm12878 combined segmentation T	rs7632756	127817508	rs2999052	127892037	1	0.986756471071276	-74529	RUVBL1	NO	NO	NO	YES	NO	NO
3	127814601	127818869	Huvec combined segmentation T	rs7632756	127817508	rs2999052	127892037	1	0.986756471071276	-74529	RUVBL1	NO	NO	NO	YES	NO	NO
3	127814401	127831873	Gm12878 combined segmentation T	rs7641133	127822320	rs2999052	127892037	1	0.986756471071276	-69717	RUVBL1	NO	NO	NO	YES	NO	NO
3	127820768	127825805	H1hesc combined segmentation T	rs7641133	127822320	rs2999052	127892037	1	0.986756471071276	-69717	RUVBL1	NO	NO	NO	YES	NO	NO
3	127819396	127829600	Huvec combined segmentation T	rs7641133	127822320	rs2999052	127892037	1	0.986756471071276	-69717	RUVBL1	NO	NO	NO	YES	NO	NO
3	127887944	127888422	Gm12878 combined segmentation T	rs872267	127888067	rs2999052	127892037	1	0.986756471071275	-3970	EEFSEC	NO	NO	NO	YES	NO	NO
3	127912964	127913362	Gm12878 combined segmentation T	rs883238	127913263	rs2999052	127892037	1	0.930195566271515	21226	EEFSEC	NO	NO	NO	YES	NO	NO
3	127937644	127940200	Gm12878 combined segmentation T	rs9814834	127938137	rs2999052	127892037	1	1	46100	EEFSEC	NO	NO	NO	YES	NO	NO
3	127946216	127946837	Gm12878 combined segmentation T	rs9830294	127946788	rs2999052	127892037	1	0.986756471071276	54751	EEFSEC	NO	NO	NO	YES	NO	NO
3	127940211	127940443	Huvec combined segmentation T	rs9845651	127940353	rs2999052	127892037	1	1	48316	EEFSEC	NO	NO	NO	YES	NO	NO
3	127937644	127940200	Gm12878 combined segmentation T	rs9847576	127937645	rs2999052	127892037	1	1	45608	EEFSEC	NO	NO	NO	YES	NO	NO
3	127937644	127940200	Gm12878 combined segmentation T	rs9857235	127939034	rs2999052	127892037	1	0.980049131426566	46997	EEFSEC	NO	NO	NO	YES	NO	NO
3	127942206	127942791	Gm12878 combined segmentation T	rs9873786	127942379	rs2999052	127892037	1	0.986756471071276	50342	EEFSEC	NO	NO	NO	YES	NO	NO
3	127936449	127936959	Gm12878 combined segmentation WE	rs9879865	127936527	rs2999052	127892037	1	1	44490	EEFSEC	NO	NO	NO	YES	NO	NO
3	127936396	127936530	Huvec combined segmentation T	rs9879865	127936527	rs2999052	127892037	1	1	44490	EEFSEC	NO	NO	NO	YES	NO	NO
3	127936501	127936764	wgEncodeRegTfbsClustered	rs9879865	127936527	rs2999052	127892037	1	1	44490	EEFSEC	NO	NO	NO	YES	NO	NO
3	127936449	127936959	Gm12878 combined segmentation WE	rs9879866	127936532	rs2999052	127892037	1	1	44495	EEFSEC	NO	NO	NO	YES	NO	NO
3	127936501	127936764	wgEncodeRegTfbsClustered	rs9879866	127936532	rs2999052	127892037	1	1	44495	EEFSEC	NO	NO	NO	YES	NO	NO
6	31082093	31083455	EncodeFaire.known	rs3094220	31082987	rs3095300	31082476	0.991389457184668	0.974485060575877	511	PSORS1C1	NO	NO	NO	YES	YES	NO
6	31082801	31083015	H1hesc combined segmentation CTCF	rs3094220	31082987	rs3095300	31082476	0.991389457184668	0.974485060575877	511	PSORS1C1	NO	NO	NO	YES	YES	NO
6	31082401	31083173	Huvec combined segmentation TSS	rs3094220	31082987	rs3095300	31082476	0.991389457184668	0.974485060575877	511	PSORS1C1	NO	NO	NO	YES	YES	NO
6	31082765	31083864	knownGene.Promoters.known	rs3094220	31082987	rs3095300	31082476	0.991389457184668	0.974485060575877	511	PSORS1C1	NO	NO	NO	YES	YES	NO
6	31082792	31083153	wgEncodeRegTfbsClustered	rs3094220	31082987	rs3095300	31082476	0.991389457184668	0.974485060575877	511	PSORS1C1	NO	NO	NO	YES	YES	NO
6	31082093	31083455	EncodeFaire.known	rs3095298	31082932	rs3095300	31082476	0.991389457184668	0.974485060575877	456	PSORS1C1	NO	NO	NO	YES	YES	NO
6	31082801	31083015	H1hesc combined segmentation CTCF	rs3095298	31082932	rs3095300	31082476	0.991389457184668	0.974485060575877	456	PSORS1C1	NO	NO	NO	YES	YES	NO
6	31082401	31083173	Huvec combined segmentation TSS	rs3095298	31082932	rs3095300	31082476	0.991389457184668	0.974485060575877	456	PSORS1C1	NO	NO	NO	YES	YES	NO
6	31082765	31083864	knownGene.Promoters.known	rs3095298	31082932	rs3095300	31082476	0.991389457184668	0.974485060575877	456	PSORS1C1	NO	NO	NO	YES	YES	NO
6	31082792	31083153	wgEncodeRegTfbsClustered	rs3095298	31082932	rs3095300	31082476	0.991389457184668	0.974485060575877	456	PSORS1C1	NO	NO	NO	YES	YES	NO
6	31089140	31089320	Huvec combined segmentation T	rs3095315	31089204	rs3095300	31082476	1	0.999999999999999	6728	CDSN	YES	NO	NO	YES	NO	NO
6	31087804	31088400	Huvec combined segmentation T	rs3095318	31088145	rs3095300	31082476	1	0.991440831074977	5669	CDSN	YES	NO	YES	YES	NO	NO
6	31081701	31082030	EncodeDnaseI_only.known	rs3130976	31081940	rs3095300	31082476	0.991205611187312	0.91865123026621	-536	PSORS1C1	YES	NO	NO	NO	NO	YES
6	31081856	31082613	H1hesc combined segmentation WE	rs3130976	31081940	rs3095300	31082476	0.991205611187312	0.91865123026621	-536	PSORS1C1	YES	NO	NO	NO	NO	YES
6	31081608	31082707	knownGene.Promoters.known	rs3130976	31081940	rs3095300	31082476	0.991205611187312	0.91865123026621	-536	PSORS1C1	YES	NO	NO	NO	NO	YES
6	31085976	31086116	Huvec combined segmentation T	rs3132550	31086048	rs3095300	31082476	0.991389457184668	0.974485060575877	3572	CDSN	NO	NO	NO	YES	NO	NO
6	31764456	31772200	Gm12878 combined segmentation T	rs114312980	31768799	rs3115672	31727897	1	1	40902	VARS	NO	NO	NO	YES	NO	NO
6	31768401	31773298	H1hesc combined segmentation T	rs114312980	31768799	rs3115672	31727897	1	1	40902	VARS	NO	NO	NO	YES	NO	NO
6	31764268	31773072	Huvec combined segmentation T	rs114312980	31768799	rs3115672	31727897	1	1	40902	VARS	NO	NO	NO	YES	NO	NO
6	31635801	31645193	Gm12878 combined segmentation T	rs114487324	31636742	rs3115672	31727897	0.999999999999998	0.981056630179435	-91155	LY6G5B	YES	NO	NO	YES	YES	NO
6	31635001	31641600	H1hesc combined segmentation T	rs114487324	31636742	rs3115672	31727897	0.999999999999998	0.981056630179435	-91155	LY6G5B	YES	NO	NO	YES	YES	NO
6	31635001	31645000	Huvec combined segmentation T	rs114487324	31636742	rs3115672	31727897	0.999999999999998	0.981056630179435	-91155	LY6G5B	YES	NO	NO	YES	YES	NO
6	31801856	31806501	Gm12878 combined segmentation TSS	rs114575504	31805913	rs3115672	31727897	1	1	78016	SNORD52	NO	NO	NO	YES	NO	NO
6	31802036	31805942	H1hesc combined segmentation TSS	rs114575504	31805913	rs3115672	31727897	1	1	78016	SNORD52	NO	NO	NO	YES	NO	NO
6	31807601	31817038	Gm12878 combined segmentation T	rs114702065	31808436	rs3115672	31727897	1	1	80539	SNORD52	NO	NO	NO	NO	NO	YES
6	31806986	31816800	H1hesc combined segmentation T	rs114702065	31808436	rs3115672	31727897	1	1	80539	SNORD52	NO	NO	NO	NO	NO	YES
6	31806801	31814615	Huvec combined segmentation T	rs114702065	31808436	rs3115672	31727897	1	1	80539	SNORD52	NO	NO	NO	NO	NO	YES
6	31808266	31808495	wgEncodeRegTfbsClustered	rs114702065	31808436	rs3115672	31727897	1	1	80539	SNORD52	NO	NO	NO	NO	NO	YES
6	31801856	31806501	Gm12878 combined segmentation TSS	rs114774714	31802101	rs3115672	31727897	1	1	74204	C6orf48	YES	NO	NO	NO	NO	YES
6	31802036	31805942	H1hesc combined segmentation TSS	rs114774714	31802101	rs3115672	31727897	1	1	74204	C6orf48	YES	NO	NO	NO	NO	YES
6	31802086	31803551	Huvec combined segmentation TSS	rs114774714	31802101	rs3115672	31727897	1	1	74204	C6orf48	YES	NO	NO	NO	NO	YES
6	31801693	31802792	knownGene.Promoters.known	rs114774714	31802101	rs3115672	31727897	1	1	74204	C6orf48	YES	NO	NO	NO	NO	YES
6	31802004	31802247	wgEncodeRegTfbsClustered	rs114774714	31802101	rs3115672	31727897	1	1	74204	C6orf48	YES	NO	NO	NO	NO	YES
6	31724418	31734663	Gm12878 combined segmentation T	rs114810088	31733466	rs3115672	31727897	1	1	5569	SAPCD1	NO	NO	YES	NO	NO	NO
6	31733401	31733988	H1hesc combined segmentation enh	rs114810088	31733466	rs3115672	31727897	1	1	5569	SAPCD1	NO	NO	YES	NO	NO	NO
6	31733271	31734370	knownGene.Promoters.known	rs114810088	31733466	rs3115672	31727897	1	1	5569	SAPCD1	NO	NO	YES	NO	NO	NO
6	31806986	31816800	H1hesc combined segmentation T	rs114837463	31807540	rs3115672	31727897	1	1	79643	SNORD52	NO	NO	NO	NO	YES	NO
6	31806801	31814615	Huvec combined segmentation T	rs114837463	31807540	rs3115672	31727897	1	1	79643	SNORD52	NO	NO	NO	NO	YES	NO
6	31744587	31745981	EncodeFaire.known	rs115200193	31745464	rs3115672	31727897	1	1	17567	VWA7	YES	NO	NO	YES	NO	NO
6	31745404	31756400	Gm12878 combined segmentation T	rs115200193	31745464	rs3115672	31727897	1	1	17567	VWA7	YES	NO	NO	YES	NO	NO
6	31745201	31759000	Huvec combined segmentation T	rs115200193	31745464	rs3115672	31727897	1	1	17567	VWA7	YES	NO	NO	YES	NO	NO
6	31745197	31746296	knownGene.Promoters.known	rs115200193	31745464	rs3115672	31727897	1	1	17567	VWA7	YES	NO	NO	YES	NO	NO
6	31745164	31745533	wgEncodeRegTfbsClustered	rs115200193	31745464	rs3115672	31727897	1	1	17567	VWA7	YES	NO	NO	YES	NO	NO
6	31745404	31756400	Gm12878 combined segmentation T	rs115392083	31749142	rs3115672	31727897	1	1	21245	VWA7	YES	NO	NO	YES	NO	NO
6	31745529	31753800	H1hesc combined segmentation T	rs115392083	31749142	rs3115672	31727897	1	1	21245	VWA7	YES	NO	NO	YES	NO	NO
6	31745201	31759000	Huvec combined segmentation T	rs115392083	31749142	rs3115672	31727897	1	1	21245	VWA7	YES	NO	NO	YES	NO	NO
6	31764456	31772200	Gm12878 combined segmentation T	rs115489726	31766660	rs3115672	31727897	1	0.981356682571695	38763	VARS	NO	NO	NO	YES	NO	NO
6	31764401	31766889	H1hesc combined segmentation T	rs115489726	31766660	rs3115672	31727897	1	0.981356682571695	38763	VARS	NO	NO	NO	YES	NO	NO
6	31764268	31773072	Huvec combined segmentation T	rs115489726	31766660	rs3115672	31727897	1	0.981356682571695	38763	VARS	NO	NO	NO	YES	NO	NO
6	31665771	31668600	Gm12878 combined segmentation T	rs115608780	31666424	rs3115672	31727897	0.961227208347645	0.90645487278547	-61473	MIR4646	NO	NO	NO	YES	NO	NO
6	31657801	31667200	H1hesc combined segmentation T	rs115608780	31666424	rs3115672	31727897	0.961227208347645	0.90645487278547	-61473	MIR4646	NO	NO	NO	YES	NO	NO
6	31658754	31669400	Huvec combined segmentation T	rs115608780	31666424	rs3115672	31727897	0.961227208347645	0.90645487278547	-61473	MIR4646	NO	NO	NO	YES	NO	NO
6	31764456	31772200	Gm12878 combined segmentation T	rs115801685	31772093	rs3115672	31727897	1	1	44196	LSM2	NO	NO	NO	YES	NO	NO
6	31768401	31773298	H1hesc combined segmentation T	rs115801685	31772093	rs3115672	31727897	1	1	44196	LSM2	NO	NO	NO	YES	NO	NO
6	31764268	31773072	Huvec combined segmentation T	rs115801685	31772093	rs3115672	31727897	1	1	44196	LSM2	NO	NO	NO	YES	NO	NO
6	31764456	31772200	Gm12878 combined segmentation T	rs115834633	31765984	rs3115672	31727897	1	0.963345342005368	38087	VARS	NO	NO	NO	YES	NO	NO
6	31764401	31766889	H1hesc combined segmentation T	rs115834633	31765984	rs3115672	31727897	1	0.963345342005368	38087	VARS	NO	NO	NO	YES	NO	NO
6	31764268	31773072	Huvec combined segmentation T	rs115834633	31765984	rs3115672	31727897	1	0.963345342005368	38087	VARS	NO	NO	NO	YES	NO	NO
6	31765069	31766168	knownGene.Promoters.known	rs115834633	31765984	rs3115672	31727897	1	0.963345342005368	38087	VARS	NO	NO	NO	YES	NO	NO
6	31798788	31799130	H1hesc combined segmentation PF	rs116025789	31799076	rs3115672	31727897	0.980792436347167	0.893745764766175	71179	HSPA1B	NO	NO	NO	NO	NO	YES
6	31798900	31799183	wgEncodeRegTfbsClustered	rs116025789	31799076	rs3115672	31727897	0.980792436347167	0.893745764766175	71179	HSPA1B	NO	NO	NO	NO	NO	YES
6	31745404	31756400	Gm12878 combined segmentation T	rs116099232	31754830	rs3115672	31727897	1	0.981356682571695	26933	VARS	NO	NO	NO	YES	NO	NO
6	31754829	31754969	H1hesc combined segmentation T	rs116099232	31754830	rs3115672	31727897	1	0.981356682571695	26933	VARS	NO	NO	NO	YES	NO	NO
6	31745201	31759000	Huvec combined segmentation T	rs116099232	31754830	rs3115672	31727897	1	0.981356682571695	26933	VARS	NO	NO	NO	YES	NO	NO
6	31745404	31756400	Gm12878 combined segmentation T	rs116227756	31749184	rs3115672	31727897	1	1	21287	VWA7	YES	NO	NO	YES	NO	NO
6	31745529	31753800	H1hesc combined segmentation T	rs116227756	31749184	rs3115672	31727897	1	1	21287	VWA7	YES	NO	NO	YES	NO	NO
6	31745201	31759000	Huvec combined segmentation T	rs116227756	31749184	rs3115672	31727897	1	1	21287	VWA7	YES	NO	NO	YES	NO	NO
6	31733999	31734497	EncodeFaire.known	rs116685783	31734345	rs3115672	31727897	1	1	6448	SAPCD1	NO	NO	YES	NO	NO	NO
6	31724418	31734663	Gm12878 combined segmentation T	rs116685783	31734345	rs3115672	31727897	1	1	6448	SAPCD1	NO	NO	YES	NO	NO	NO
6	31733989	31734593	H1hesc combined segmentation TSS	rs116685783	31734345	rs3115672	31727897	1	1	6448	SAPCD1	NO	NO	YES	NO	NO	NO
6	31734201	31734527	Huvec combined segmentation PF	rs116685783	31734345	rs3115672	31727897	1	1	6448	SAPCD1	NO	NO	YES	NO	NO	NO
6	31733271	31734370	knownGene.Promoters.known	rs116685783	31734345	rs3115672	31727897	1	1	6448	SAPCD1	NO	NO	YES	NO	NO	NO
6	31734130	31734393	wgEncodeRegTfbsClustered	rs116685783	31734345	rs3115672	31727897	1	1	6448	SAPCD1	NO	NO	YES	NO	NO	NO
6	31818065	31818303	Huvec combined segmentation T	rs139285835	31818108	rs3115672	31727897	0.999999999999998	0.981056630179435	90211	NEU1	NO	NO	NO	NO	NO	YES
6	31670006	31672031	EncodeFaire.known	rs140272475	31671557	rs3115672	31727897	0.999999999999998	0.981056630179435	-56340	ABHD16A	YES	NO	NO	YES	NO	NO
6	31669539	31671667	Gm12878 combined segmentation TSS	rs140272475	31671557	rs3115672	31727897	0.999999999999998	0.981056630179435	-56340	ABHD16A	YES	NO	NO	YES	NO	NO
6	31670451	31671807	wgEncodeRegTfbsClustered	rs140272475	31671557	rs3115672	31727897	0.999999999999998	0.981056630179435	-56340	ABHD16A	YES	NO	NO	YES	NO	NO
6	31807601	31817038	Gm12878 combined segmentation T	rs141597299	31810612	rs3115672	31727897	1	1	82715	SNORD52	NO	NO	NO	NO	NO	YES
6	31806986	31816800	H1hesc combined segmentation T	rs141597299	31810612	rs3115672	31727897	1	1	82715	SNORD52	NO	NO	NO	NO	NO	YES
6	31806801	31814615	Huvec combined segmentation T	rs141597299	31810612	rs3115672	31727897	1	1	82715	SNORD52	NO	NO	NO	NO	NO	YES
6	31786667	31787226	Gm12878 combined segmentation T	rs142536810	31787167	rs3115672	31727897	1	0.981356682571695	59270	HSPA1A	YES	NO	NO	NO	NO	YES
6	31787140	31787339	Huvec combined segmentation T	rs142536810	31787167	rs3115672	31727897	1	0.981356682571695	59270	HSPA1A	YES	NO	NO	NO	NO	YES
6	31786957	31787172	wgEncodeRegTfbsClustered	rs142536810	31787167	rs3115672	31727897	1	0.981356682571695	59270	HSPA1A	YES	NO	NO	NO	NO	YES
6	31709401	31720000	Gm12878 combined segmentation T	rs143931989	31714031	rs3115672	31727897	1	1	-13866	MSH5	NO	NO	NO	YES	NO	NO
6	31709601	31717883	Huvec combined segmentation T	rs143931989	31714031	rs3115672	31727897	1	1	-13866	MSH5	NO	NO	NO	YES	NO	NO
6	31761001	31761800	Gm12878 combined segmentation PF	rs148571049	31761213	rs3115672	31727897	0.999999999999999	0.945934379457916	33316	VARS	NO	NO	NO	YES	NO	NO
6	31761201	31761400	H1hesc combined segmentation T	rs148571049	31761213	rs3115672	31727897	0.999999999999999	0.945934379457916	33316	VARS	NO	NO	NO	YES	NO	NO
6	31761001	31761400	Huvec combined segmentation enh	rs148571049	31761213	rs3115672	31727897	0.999999999999999	0.945934379457916	33316	VARS	NO	NO	NO	YES	NO	NO
6	31705681	31706050	EncodeDnaseI_only.known	rs3101018	31705864	rs3115672	31727897	1	1	-22033	CLIC1	YES	NO	NO	NO	NO	YES
6	31705244	31706844	EncodeFaire.known	rs3101018	31705864	rs3115672	31727897	1	1	-22033	CLIC1	YES	NO	NO	NO	NO	YES
6	31701788	31709120	Gm12878 combined segmentation TSS	rs3101018	31705864	rs3115672	31727897	1	1	-22033	CLIC1	YES	NO	NO	NO	NO	YES
6	31705601	31706200	H1hesc combined segmentation enh	rs3101018	31705864	rs3115672	31727897	1	1	-22033	CLIC1	YES	NO	NO	NO	NO	YES
6	31701871	31706610	Huvec combined segmentation TSS	rs3101018	31705864	rs3115672	31727897	1	1	-22033	CLIC1	YES	NO	NO	NO	NO	YES
6	31705578	31705921	wgEncodeRegTfbsClustered	rs3101018	31705864	rs3115672	31727897	1	1	-22033	CLIC1	YES	NO	NO	NO	NO	YES
6	31709401	31720000	Gm12878 combined segmentation T	rs3117573	31718396	rs3115672	31727897	1	1	-9501	SAPCD1	NO	NO	NO	YES	NO	NO
6	31718001	31718400	H1hesc combined segmentation T	rs3117573	31718396	rs3115672	31727897	1	1	-9501	SAPCD1	NO	NO	NO	YES	NO	NO
6	31718001	31720200	Huvec combined segmentation T	rs3117573	31718396	rs3115672	31727897	1	1	-9501	SAPCD1	NO	NO	NO	YES	NO	NO
6	31718148	31718431	wgEncodeRegTfbsClustered	rs3117573	31718396	rs3115672	31727897	1	1	-9501	SAPCD1	NO	NO	NO	YES	NO	NO
6	31724418	31734663	Gm12878 combined segmentation T	rs3117574	31725230	rs3115672	31727897	0.999999999999999	0.945934379457916	-2667	SAPCD1	YES	YES	NO	YES	NO	NO
6	31724001	31730800	Huvec combined segmentation T	rs3117574	31725230	rs3115672	31727897	0.999999999999999	0.945934379457916	-2667	SAPCD1	YES	YES	NO	YES	NO	NO
6	31724418	31734663	Gm12878 combined segmentation T	rs3117575	31726253	rs3115672	31727897	1	1	-1644	SAPCD1	YES	NO	NO	YES	NO	NO
6	31725801	31731000	H1hesc combined segmentation T	rs3117575	31726253	rs3115672	31727897	1	1	-1644	SAPCD1	YES	NO	NO	YES	NO	NO
6	31724001	31730800	Huvec combined segmentation T	rs3117575	31726253	rs3115672	31727897	1	1	-1644	SAPCD1	YES	NO	NO	YES	NO	NO
6	31726202	31727301	knownGene.Promoters.known	rs3117575	31726253	rs3115672	31727897	1	1	-1644	SAPCD1	YES	NO	NO	YES	NO	NO
6	31724418	31734663	Gm12878 combined segmentation T	rs3117576	31726794	rs3115672	31727897	1	1	-1103	SAPCD1	YES	NO	NO	YES	NO	NO
6	31725801	31731000	H1hesc combined segmentation T	rs3117576	31726794	rs3115672	31727897	1	1	-1103	SAPCD1	YES	NO	NO	YES	NO	NO
6	31724001	31730800	Huvec combined segmentation T	rs3117576	31726794	rs3115672	31727897	1	1	-1103	SAPCD1	YES	NO	NO	YES	NO	NO
6	31726202	31727301	knownGene.Promoters.known	rs3117576	31726794	rs3115672	31727897	1	1	-1103	SAPCD1	YES	NO	NO	YES	NO	NO
6	31724418	31734663	Gm12878 combined segmentation T	rs3117577	31727474	rs3115672	31727897	1	1	-423	SAPCD1	NO	NO	NO	YES	NO	NO
6	31725801	31731000	H1hesc combined segmentation T	rs3117577	31727474	rs3115672	31727897	1	1	-423	SAPCD1	NO	NO	NO	YES	NO	NO
6	31724001	31730800	Huvec combined segmentation T	rs3117577	31727474	rs3115672	31727897	1	1	-423	SAPCD1	NO	NO	NO	YES	NO	NO
6	31709401	31720000	Gm12878 combined segmentation T	rs3130484	31715882	rs3115672	31727897	1	1	-12015	MSH5	NO	NO	NO	YES	NO	NO
6	31709601	31717883	Huvec combined segmentation T	rs3130484	31715882	rs3115672	31727897	1	1	-12015	MSH5	NO	NO	NO	YES	NO	NO
6	31724418	31734663	Gm12878 combined segmentation T	rs3131378	31725285	rs3115672	31727897	1	1	-2612	SAPCD1	YES	YES	NO	YES	NO	NO
6	31724001	31730800	Huvec combined segmentation T	rs3131378	31725285	rs3115672	31727897	1	1	-2612	SAPCD1	YES	YES	NO	YES	NO	NO
6	31720443	31721709	Gm12878 combined segmentation T	rs3131379	31721033	rs3115672	31727897	1	1	-6864	SAPCD1	NO	NO	NO	YES	NO	NO
6	31709401	31720000	Gm12878 combined segmentation T	rs3131380	31709778	rs3115672	31727897	1	1	-18119	MSH5	NO	NO	NO	YES	NO	NO
6	31708733	31710000	H1hesc combined segmentation T	rs3131380	31709778	rs3115672	31727897	1	1	-18119	MSH5	NO	NO	NO	YES	NO	NO
6	31709601	31717883	Huvec combined segmentation T	rs3131380	31709778	rs3115672	31727897	1	1	-18119	MSH5	NO	NO	NO	YES	NO	NO
6	31701788	31709120	Gm12878 combined segmentation TSS	rs3131381	31708463	rs3115672	31727897	1	1	-19434	MSH5	NO	NO	NO	YES	NO	NO
6	31706976	31708589	H1hesc combined segmentation TSS	rs3131381	31708463	rs3115672	31727897	1	1	-19434	MSH5	NO	NO	NO	YES	NO	NO
6	31708058	31708507	wgEncodeRegTfbsClustered	rs3131381	31708463	rs3115672	31727897	1	1	-19434	MSH5	NO	NO	NO	YES	NO	NO
6	31704021	31704450	EncodeDnaseI_only.known	rs3131383	31704294	rs3115672	31727897	1	1	-23603	CLIC1	YES	YES	NO	NO	NO	NO
6	31703908	31704765	EncodeFaire.known	rs3131383	31704294	rs3115672	31727897	1	1	-23603	CLIC1	YES	YES	NO	NO	NO	NO
6	31701788	31709120	Gm12878 combined segmentation TSS	rs3131383	31704294	rs3115672	31727897	1	1	-23603	CLIC1	YES	YES	NO	NO	NO	NO
6	31702236	31704800	H1hesc combined segmentation TSS	rs3131383	31704294	rs3115672	31727897	1	1	-23603	CLIC1	YES	YES	NO	NO	NO	NO
6	31701871	31706610	Huvec combined segmentation TSS	rs3131383	31704294	rs3115672	31727897	1	1	-23603	CLIC1	YES	YES	NO	NO	NO	NO
6	31703904	31704407	wgEncodeRegTfbsClustered	rs3131383	31704294	rs3115672	31727897	1	1	-23603	CLIC1	YES	YES	NO	NO	NO	NO
6	31709401	31720000	Gm12878 combined segmentation T	rs3132445	31712196	rs3115672	31727897	1	1	-15701	MSH5	YES	NO	NO	YES	NO	NO
6	31709601	31717883	Huvec combined segmentation T	rs3132445	31712196	rs3115672	31727897	1	1	-15701	MSH5	YES	NO	NO	YES	NO	NO
19	17379801	17391799	Gm12878 combined segmentation T	rs10420922	17382505	rs35604430	17382990	0.994138188172401	0.905156165223053	-485	BABAM1	NO	NO	NO	YES	NO	NO
19	17380201	17389000	H1hesc combined segmentation T	rs10420922	17382505	rs35604430	17382990	0.994138188172401	0.905156165223053	-485	BABAM1	NO	NO	NO	YES	NO	NO
19	17379626	17392200	Huvec combined segmentation T	rs10420922	17382505	rs35604430	17382990	0.994138188172401	0.905156165223053	-485	BABAM1	NO	NO	NO	YES	NO	NO
19	17379801	17391799	Gm12878 combined segmentation T	rs59997441	17381463	rs35604430	17382990	1	0.972582325366051	-1527	BABAM1	NO	NO	NO	YES	NO	NO
19	17380201	17389000	H1hesc combined segmentation T	rs59997441	17381463	rs35604430	17382990	1	0.972582325366051	-1527	BABAM1	NO	NO	NO	YES	NO	NO
19	17379626	17392200	Huvec combined segmentation T	rs59997441	17381463	rs35604430	17382990	1	0.972582325366051	-1527	BABAM1	NO	NO	NO	YES	NO	NO
19	17379801	17391799	Gm12878 combined segmentation T	rs73509964	17380975	rs35604430	17382990	0.988734087227463	0.961443894674555	-2015	BABAM1	NO	NO	NO	YES	NO	NO
19	17380201	17389000	H1hesc combined segmentation T	rs73509964	17380975	rs35604430	17382990	0.988734087227463	0.961443894674555	-2015	BABAM1	NO	NO	NO	YES	NO	NO
19	17379626	17392200	Huvec combined segmentation T	rs73509964	17380975	rs35604430	17382990	0.988734087227463	0.961443894674555	-2015	BABAM1	NO	NO	NO	YES	NO	NO
19	17379801	17391799	Gm12878 combined segmentation T	rs11667618	17390478	rs3745185	17384267	0.960967003967162	0.866723845665729	6211	ANKLE1	YES	NO	NO	YES	NO	NO
19	17389201	17392159	H1hesc combined segmentation T	rs11667618	17390478	rs3745185	17384267	0.960967003967162	0.866723845665729	6211	ANKLE1	YES	NO	NO	YES	NO	NO
19	17379626	17392200	Huvec combined segmentation T	rs11667618	17390478	rs3745185	17384267	0.960967003967162	0.866723845665729	6211	ANKLE1	YES	NO	NO	YES	NO	NO
19	17379801	17391799	Gm12878 combined segmentation T	rs11667661	17390579	rs3745185	17384267	0.961272625568448	0.876497939184568	6312	ANKLE1	YES	NO	NO	YES	NO	NO
19	17389201	17392159	H1hesc combined segmentation T	rs11667661	17390579	rs3745185	17384267	0.961272625568448	0.876497939184568	6312	ANKLE1	YES	NO	NO	YES	NO	NO
19	17379626	17392200	Huvec combined segmentation T	rs11667661	17390579	rs3745185	17384267	0.961272625568448	0.876497939184568	6312	ANKLE1	YES	NO	NO	YES	NO	NO
19	17400361	17400630	EncodeDnaseI_only.known	rs11669059	17400453	rs3745185	17384267	0.950282655543765	0.861111718664923	16186	ANKLE1	NO	NO	NO	NO	NO	YES
19	17400305	17400695	EncodeFaire.known	rs11669059	17400453	rs3745185	17384267	0.950282655543765	0.861111718664923	16186	ANKLE1	NO	NO	NO	NO	NO	YES
19	17400413	17400600	Huvec combined segmentation TSS	rs11669059	17400453	rs3745185	17384267	0.950282655543765	0.861111718664923	16186	ANKLE1	NO	NO	NO	NO	NO	YES
19	17400373	17400656	wgEncodeRegTfbsClustered	rs11669059	17400453	rs3745185	17384267	0.950282655543765	0.861111718664923	16186	ANKLE1	NO	NO	NO	NO	NO	YES
19	17401563	17402719	H1hesc combined segmentation T	rs12975707	17401680	rs3745185	17384267	0.960961237922157	0.866713444572482	17413	ANKLE1	NO	NO	NO	NO	NO	YES
19	17379801	17391799	Gm12878 combined segmentation T	rs62126227	17383602	rs3745185	17384267	0.988736091667491	0.898315895568252	-665	BABAM1	NO	NO	NO	YES	NO	NO
19	17380201	17389000	H1hesc combined segmentation T	rs62126227	17383602	rs3745185	17384267	0.988736091667491	0.898315895568252	-665	BABAM1	NO	NO	NO	YES	NO	NO
19	17379626	17392200	Huvec combined segmentation T	rs62126227	17383602	rs3745185	17384267	0.988736091667491	0.898315895568252	-665	BABAM1	NO	NO	NO	YES	NO	NO
19	17401189	17401343	H1hesc combined segmentation T	rs7245873	17401315	rs3745185	17384267	0.961117559075436	0.871593701534708	17048	ANKLE1	NO	NO	NO	NO	NO	YES
8	128520919	128523102	EncodeFaire.known	rs10088308	128522914	rs4498506	128529033	1	0.882288166699608	-6119	LOC727677	NO	NO	NO	NO	NO	YES
8	128520919	128523102	EncodeFaire.known	rs10099413	128522063	rs4498506	128529033	1	0.882288166699608	-6970	LOC727677	NO	NO	NO	NO	NO	YES
8	128485182	128486646	EncodeFaire.known	rs10109700	128485964	rs4498506	128529033	0.972635363717045	0.823930784436458	-43069	LOC727677	NO	NO	NO	YES	NO	NO
8	128531586	128531774	Huvec combined segmentation T	rs11986220	128531689	rs4498506	128529033	1	0.847932098765432	2656	LOC727677	NO	NO	NO	NO	NO	YES
8	128529546	128530259	EncodeFaire.known	rs11992171	128529933	rs4498506	128529033	1	0.922183439415716	900	LOC727677	NO	NO	NO	NO	NO	YES
8	128534705	128534859	Huvec combined segmentation T	rs12545648	128534755	rs4498506	128529033	0.947205331811013	0.812611368598364	5722	LOC727677	NO	NO	NO	NO	NO	YES
8	128484923	128485152	wgEncodeRegTfbsClustered	rs1447295	128485038	rs4498506	128529033	0.972635363717045	0.823930784436458	-43995	LOC727677	NO	NO	NO	YES	NO	NO
8	128517542	128518188	Gm12878 combined segmentation WE	rs4242382	128517573	rs4498506	128529033	0.986155382173409	0.835789372536522	-11460	LOC727677	NO	NO	NO	NO	NO	YES
8	128517601	128518070	EncodeDnaseI_only.known	rs4314621	128518015	rs4498506	128529033	1	0.847932098765432	-11018	LOC727677	NO	NO	NO	NO	NO	YES
8	128517542	128518188	Gm12878 combined segmentation WE	rs4314621	128518015	rs4498506	128529033	1	0.847932098765432	-11018	LOC727677	NO	NO	NO	NO	NO	YES
8	128517894	128518053	Huvec combined segmentation T	rs4314621	128518015	rs4498506	128529033	1	0.847932098765432	-11018	LOC727677	NO	NO	NO	NO	NO	YES
8	128517799	128518098	wgEncodeRegTfbsClustered	rs4314621	128518015	rs4498506	128529033	1	0.847932098765432	-11018	LOC727677	NO	NO	NO	NO	NO	YES
8	128532201	128532400	Huvec combined segmentation T	rs4515512	128532399	rs4498506	128529033	1	0.847932098765432	3366	LOC727677	NO	NO	NO	NO	NO	YES
8	128479722	128480246	EncodeFaire.known	rs4871798	128479963	rs4498506	128529033	1	0.827741090286876	-49070	LOC727677	NO	NO	NO	YES	NO	NO
8	128483688	128483971	wgEncodeRegTfbsClustered	rs4871801	128483914	rs4498506	128529033	0.972635363717045	0.823930784436458	-45119	LOC727677	NO	NO	NO	YES	NO	NO
8	128485182	128486646	EncodeFaire.known	rs4871802	128485640	rs4498506	128529033	0.972635363717045	0.823930784436458	-43393	LOC727677	NO	NO	NO	YES	NO	NO
8	128483991	128484230	Huvec combined segmentation T	rs6470518	128484181	rs4498506	128529033	0.972635363717045	0.823930784436458	-44852	LOC727677	NO	NO	NO	YES	NO	NO
8	128483991	128484230	Huvec combined segmentation T	rs6470519	128484223	rs4498506	128529033	0.972635363717045	0.823930784436458	-44810	LOC727677	NO	NO	NO	YES	NO	NO
8	128544185	128544893	EncodeFaire.known	rs6470529	128544812	rs4498506	128529033	0.934745624793146	0.801562751490316	15779	LOC727677	NO	NO	NO	NO	NO	YES
8	128544643	128544840	Gm12878 combined segmentation T	rs6470529	128544812	rs4498506	128529033	0.934745624793146	0.801562751490316	15779	LOC727677	NO	NO	NO	NO	NO	YES
8	128525181	128525370	EncodeDnaseI_only.known	rs7017300	128525268	rs4498506	128529033	1	0.882288166699608	-3765	LOC727677	NO	NO	NO	NO	NO	YES
8	128524458	128525443	EncodeFaire.known	rs7017300	128525268	rs4498506	128529033	1	0.882288166699608	-3765	LOC727677	NO	NO	NO	NO	NO	YES
8	128519621	128520190	EncodeDnaseI_only.known	rs7812429	128520173	rs4498506	128529033	1	0.847932098765432	-8860	LOC727677	NO	NO	NO	NO	NO	YES
8	128519473	128520713	EncodeFaire.known	rs7812429	128520173	rs4498506	128529033	1	0.847932098765432	-8860	LOC727677	NO	NO	NO	NO	NO	YES
8	128518947	128521847	Huvec combined segmentation enh	rs7812429	128520173	rs4498506	128529033	1	0.847932098765432	-8860	LOC727677	NO	NO	NO	NO	NO	YES
8	128519958	128520337	wgEncodeRegTfbsClustered	rs7812429	128520173	rs4498506	128529033	1	0.847932098765432	-8860	LOC727677	NO	NO	NO	NO	NO	YES
8	128519473	128520713	EncodeFaire.known	rs7812894	128520479	rs4498506	128529033	1	0.847932098765432	-8554	LOC727677	NO	NO	NO	NO	NO	YES
8	128518947	128521847	Huvec combined segmentation enh	rs7812894	128520479	rs4498506	128529033	1	0.847932098765432	-8554	LOC727677	NO	NO	NO	NO	NO	YES
8	128520919	128523102	EncodeFaire.known	rs7814837	128522202	rs4498506	128529033	1	0.847932098765432	-6831	LOC727677	NO	NO	NO	NO	NO	YES
8	128489071	128489413	Gm12878 combined segmentation T	rs7826179	128489199	rs4498506	128529033	0.972635363717045	0.823930784436458	-39834	LOC727677	NO	NO	NO	YES	NO	NO
8	128538747	128539030	Gm12878 combined segmentation T	rs8180905	128538824	rs4498506	128529033	0.959950421746386	0.823912508607862	9791	LOC727677	NO	NO	NO	NO	NO	YES
8	128518797	128519188	EncodeFaire.known	rs9297759	128519171	rs4498506	128529033	1	0.847932098765432	-9862	LOC727677	NO	NO	NO	NO	NO	YES
8	128518947	128521847	Huvec combined segmentation enh	rs9297759	128519171	rs4498506	128529033	1	0.847932098765432	-9862	LOC727677	NO	NO	NO	NO	NO	YES
8	128494439	128494842	EncodeFaire.known	rs9643226	128494481	rs4498506	128529033	0.986155382173409	0.835789372536522	-34552	LOC727677	YES	NO	NO	NO	NO	YES
3	170122944	170123351	EncodeFaire.known	rs56121376	170123144	rs55953261	170121598	1	0.989496729852566	1546	CLDN11	NO	NO	NO	NO	NO	YES
3	169996401	170010800	H1hesc combined segmentation T	rs71277158	169999216	rs56257047	169988286	1	1	10930	PRKCI	NO	NO	NO	YES	NO	NO
3	170074081	170075250	EncodeDnaseI_only.known	rs78416326	170074517	rs61436251	170083629	0.990894357532859	0.923611978735884	-9112	SKIL	YES	NO	NO	NO	NO	YES
3	170074018	170074672	EncodeFaire.known	rs78416326	170074517	rs61436251	170083629	0.990894357532859	0.923611978735884	-9112	SKIL	YES	NO	NO	NO	NO	YES
3	170073601	170075013	Gm12878 combined segmentation TSS	rs78416326	170074517	rs61436251	170083629	0.990894357532859	0.923611978735884	-9112	SKIL	YES	NO	NO	NO	NO	YES
3	170073975	170076658	H1hesc combined segmentation TSS	rs78416326	170074517	rs61436251	170083629	0.990894357532859	0.923611978735884	-9112	SKIL	YES	NO	NO	NO	NO	YES
3	170073801	170077799	Huvec combined segmentation TSS	rs78416326	170074517	rs61436251	170083629	0.990894357532859	0.923611978735884	-9112	SKIL	YES	NO	NO	NO	NO	YES
3	170074473	170075572	knownGene.Promoters.known	rs78416326	170074517	rs61436251	170083629	0.990894357532859	0.923611978735884	-9112	SKIL	YES	NO	NO	NO	NO	YES
3	170074180	170074910	wgEncodeRegTfbsClustered	rs78416326	170074517	rs61436251	170083629	0.990894357532859	0.923611978735884	-9112	SKIL	YES	NO	NO	NO	NO	YES
6	130369201	130390973	Gm12878 combined segmentation T	rs7740107	130374461	rs6569648	130349119	0.991799055514221	0.821647681510964	25342	L3MBTL3	NO	NO	NO	YES	NO	NO
6	130369369	130397600	Huvec combined segmentation T	rs7740107	130374461	rs6569648	130349119	0.991799055514221	0.821647681510964	25342	L3MBTL3	NO	NO	NO	YES	NO	NO
8	128506670	128510908	EncodeFaire.known	rs12156128	128507191	rs67111856	128500547	0.974464456871284	0.854416425027304	6644	LOC727677	NO	NO	NO	NO	NO	YES
8	128507070	128507249	wgEncodeRegTfbsClustered	rs12156128	128507191	rs67111856	128500547	0.974464456871284	0.854416425027304	6644	LOC727677	NO	NO	NO	NO	NO	YES
8	128530929	128531354	EncodeFaire.known	rs13265719	128531028	rs67111856	128500547	0.962208927006588	0.848065102716187	30481	LOC727677	NO	NO	NO	NO	NO	YES
8	128515035	128515270	Gm12878 combined segmentation T	rs34561884	128515051	rs67111856	128500547	0.974464456871284	0.854416425027304	14504	LOC727677	NO	NO	NO	NO	NO	YES
8	128513877	128514516	EncodeFaire.known	rs35385035	128514398	rs67111856	128500547	0.974464456871284	0.854416425027304	13851	LOC727677	NO	NO	NO	NO	NO	YES
8	128515035	128515270	Gm12878 combined segmentation T	rs35774048	128515210	rs67111856	128500547	0.974464456871284	0.854416425027304	14663	LOC727677	NO	NO	NO	NO	NO	YES
8	128523215	128523345	Huvec combined segmentation T	rs35907927	128523285	rs67111856	128500547	0.980552428038224	0.849726138766935	22738	LOC727677	NO	NO	NO	NO	NO	YES
8	128506670	128510908	EncodeFaire.known	rs55903116	128510211	rs67111856	128500547	0.993538267549198	0.872381681571959	9664	LOC727677	NO	NO	NO	NO	NO	YES
8	128525624	128525997	Gm12878 combined segmentation T	rs7004374	128525985	rs67111856	128500547	0.968039368893592	0.843186456374634	25438	LOC727677	NO	NO	NO	NO	NO	YES
6	31835001	31835200	H1hesc combined segmentation T	rs693906	31835164	rs67682613	31826705	1	0.974108042561185	8459	NEU1	NO	NO	NO	YES	NO	NO
6	130369201	130390973	Gm12878 combined segmentation T	rs11752200	130377847	rs6900473	130375810	1	1	2037	L3MBTL3	NO	NO	NO	YES	NO	NO
6	130369369	130397600	Huvec combined segmentation T	rs11752200	130377847	rs6900473	130375810	1	1	2037	L3MBTL3	NO	NO	NO	YES	NO	NO
6	130369201	130390973	Gm12878 combined segmentation T	rs11759018	130377843	rs6900473	130375810	1	1	2033	L3MBTL3	NO	NO	NO	YES	NO	NO
6	130369369	130397600	Huvec combined segmentation T	rs11759018	130377843	rs6900473	130375810	1	1	2033	L3MBTL3	NO	NO	NO	YES	NO	NO
6	130369201	130390973	Gm12878 combined segmentation T	rs12661188	130378833	rs6900473	130375810	1	0.987906442451897	3023	L3MBTL3	NO	NO	NO	YES	NO	NO
6	130369369	130397600	Huvec combined segmentation T	rs12661188	130378833	rs6900473	130375810	1	0.987906442451897	3023	L3MBTL3	NO	NO	NO	YES	NO	NO
6	130343801	130349800	Huvec combined segmentation T	rs1415700	130345791	rs6900473	130375810	0.993261267104557	0.88755770691245	-30019	L3MBTL3	NO	NO	NO	YES	NO	NO
6	130369201	130390973	Gm12878 combined segmentation T	rs4279458	130369871	rs6900473	130375810	1	0.882261571916744	-5939	L3MBTL3	NO	NO	NO	YES	NO	NO
6	130369369	130397600	Huvec combined segmentation T	rs4279458	130369871	rs6900473	130375810	1	0.882261571916744	-5939	L3MBTL3	NO	NO	NO	YES	NO	NO
6	130369201	130390973	Gm12878 combined segmentation T	rs4321845	130369983	rs6900473	130375810	1	0.882261571916744	-5827	L3MBTL3	NO	NO	NO	YES	NO	NO
6	130369369	130397600	Huvec combined segmentation T	rs4321845	130369983	rs6900473	130375810	1	0.882261571916744	-5827	L3MBTL3	NO	NO	NO	YES	NO	NO
6	130369201	130390973	Gm12878 combined segmentation T	rs4339481	130382653	rs6900473	130375810	1	0.882261571916744	6843	L3MBTL3	NO	NO	NO	YES	NO	NO
6	130369369	130397600	Huvec combined segmentation T	rs4339481	130382653	rs6900473	130375810	1	0.882261571916744	6843	L3MBTL3	NO	NO	NO	YES	NO	NO
6	130369201	130390973	Gm12878 combined segmentation T	rs4373379	130374569	rs6900473	130375810	1	0.872029008911138	-1241	L3MBTL3	NO	NO	NO	YES	NO	NO
6	130369369	130397600	Huvec combined segmentation T	rs4373379	130374569	rs6900473	130375810	1	0.872029008911138	-1241	L3MBTL3	NO	NO	NO	YES	NO	NO
6	130369201	130390973	Gm12878 combined segmentation T	rs4404788	130369323	rs6900473	130375810	1	0.882261571916744	-6487	L3MBTL3	NO	NO	NO	YES	NO	NO
6	130363066	130368800	Huvec combined segmentation T	rs4551191	130366218	rs6900473	130375810	1	0.882261571916744	-9592	L3MBTL3	NO	NO	NO	YES	NO	NO
6	130363066	130368800	Huvec combined segmentation T	rs4594967	130366161	rs6900473	130375810	1	0.882261571916744	-9649	L3MBTL3	NO	NO	NO	YES	NO	NO
6	130358369	130358616	EncodeFaire.known	rs6899976	130358428	rs6900473	130375810	1	0.905368289637953	-17382	L3MBTL3	NO	NO	NO	YES	NO	NO
6	130358201	130358800	Gm12878 combined segmentation CTCF	rs6899976	130358428	rs6900473	130375810	1	0.905368289637953	-17382	L3MBTL3	NO	NO	NO	YES	NO	NO
6	130358401	130358800	H1hesc combined segmentation CTCF	rs6899976	130358428	rs6900473	130375810	1	0.905368289637953	-17382	L3MBTL3	NO	NO	NO	YES	NO	NO
6	130358415	130358717	Huvec combined segmentation CTCF	rs6899976	130358428	rs6900473	130375810	1	0.905368289637953	-17382	L3MBTL3	NO	NO	NO	YES	NO	NO
6	130358367	130358720	wgEncodeRegTfbsClustered	rs6899976	130358428	rs6900473	130375810	1	0.905368289637953	-17382	L3MBTL3	NO	NO	NO	YES	NO	NO
6	130369201	130390973	Gm12878 combined segmentation T	rs6914670	130372984	rs6900473	130375810	1	1	-2826	L3MBTL3	NO	NO	NO	YES	NO	NO
6	130372892	130373069	H1hesc combined segmentation T	rs6914670	130372984	rs6900473	130375810	1	1	-2826	L3MBTL3	NO	NO	NO	YES	NO	NO
6	130369369	130397600	Huvec combined segmentation T	rs6914670	130372984	rs6900473	130375810	1	1	-2826	L3MBTL3	NO	NO	NO	YES	NO	NO
6	130369201	130390973	Gm12878 combined segmentation T	rs6923819	130376095	rs6900473	130375810	1	0.882261571916744	285	L3MBTL3	NO	NO	NO	YES	NO	NO
6	130369369	130397600	Huvec combined segmentation T	rs6923819	130376095	rs6900473	130375810	1	0.882261571916744	285	L3MBTL3	NO	NO	NO	YES	NO	NO
6	130369201	130390973	Gm12878 combined segmentation T	rs7451021	130381246	rs6900473	130375810	1	1	5436	L3MBTL3	NO	NO	YES	NO	NO	NO
6	130369369	130397600	Huvec combined segmentation T	rs7451021	130381246	rs6900473	130375810	1	1	5436	L3MBTL3	NO	NO	YES	NO	NO	NO
6	130343801	130349800	Huvec combined segmentation T	rs7740188	130346105	rs6900473	130375810	0.993261267104557	0.88755770691245	-29705	L3MBTL3	NO	NO	NO	YES	NO	NO
6	130363066	130368800	Huvec combined segmentation T	rs7744830	130367725	rs6900473	130375810	1	1	-8085	L3MBTL3	NO	NO	NO	YES	NO	NO
6	130369201	130390973	Gm12878 combined segmentation T	rs7746589	130371840	rs6900473	130375810	1	0.882261571916744	-3970	L3MBTL3	NO	NO	NO	YES	NO	NO
6	130369369	130397600	Huvec combined segmentation T	rs7746589	130371840	rs6900473	130375810	1	0.882261571916744	-3970	L3MBTL3	NO	NO	NO	YES	NO	NO
6	130369201	130390973	Gm12878 combined segmentation T	rs7756870	130373648	rs6900473	130375810	1	1	-2162	L3MBTL3	NO	NO	NO	YES	NO	NO
6	130373201	130374251	H1hesc combined segmentation T	rs7756870	130373648	rs6900473	130375810	1	1	-2162	L3MBTL3	NO	NO	NO	YES	NO	NO
6	130369369	130397600	Huvec combined segmentation T	rs7756870	130373648	rs6900473	130375810	1	1	-2162	L3MBTL3	NO	NO	NO	YES	NO	NO
6	130369201	130390973	Gm12878 combined segmentation T	rs7760760	130379852	rs6900473	130375810	1	0.981934315267648	4042	L3MBTL3	NO	NO	NO	YES	NO	NO
6	130369369	130397600	Huvec combined segmentation T	rs7760760	130379852	rs6900473	130375810	1	0.981934315267648	4042	L3MBTL3	NO	NO	NO	YES	NO	NO
6	130369201	130390973	Gm12878 combined segmentation T	rs7761063	130379973	rs6900473	130375810	1	0.882261571916744	4163	L3MBTL3	NO	NO	NO	YES	NO	NO
6	130369369	130397600	Huvec combined segmentation T	rs7761063	130379973	rs6900473	130375810	1	0.882261571916744	4163	L3MBTL3	NO	NO	NO	YES	NO	NO
6	130363066	130368800	Huvec combined segmentation T	rs7763108	130367793	rs6900473	130375810	1	0.882261571916744	-8017	L3MBTL3	NO	NO	NO	YES	NO	NO
6	130369201	130390973	Gm12878 combined segmentation T	rs9372954	130373529	rs6900473	130375810	1	0.882261571916744	-2281	L3MBTL3	NO	NO	NO	YES	NO	NO
6	130373201	130374251	H1hesc combined segmentation T	rs9372954	130373529	rs6900473	130375810	1	0.882261571916744	-2281	L3MBTL3	NO	NO	NO	YES	NO	NO
6	130369369	130397600	Huvec combined segmentation T	rs9372954	130373529	rs6900473	130375810	1	0.882261571916744	-2281	L3MBTL3	NO	NO	NO	YES	NO	NO
6	130356166	130358414	Huvec combined segmentation T	rs9375694	130356608	rs6900473	130375810	1	0.905368289637953	-19202	L3MBTL3	NO	NO	NO	YES	NO	NO
6	130356425	130356680	wgEncodeRegTfbsClustered	rs9375694	130356608	rs6900473	130375810	1	0.905368289637953	-19202	L3MBTL3	NO	NO	NO	YES	NO	NO
6	130358718	130360909	Huvec combined segmentation T	rs9375695	130358944	rs6900473	130375810	1	0.905368289637953	-16866	L3MBTL3	NO	NO	NO	YES	NO	NO
6	130368601	130369200	Gm12878 combined segmentation CTCF	rs9375698	130368602	rs6900473	130375810	1	0.882261571916744	-7208	L3MBTL3	NO	NO	NO	YES	NO	NO
6	130363066	130368800	Huvec combined segmentation T	rs9375698	130368602	rs6900473	130375810	1	0.882261571916744	-7208	L3MBTL3	NO	NO	NO	YES	NO	NO
6	130368600	130368839	wgEncodeRegTfbsClustered	rs9375698	130368602	rs6900473	130375810	1	0.882261571916744	-7208	L3MBTL3	NO	NO	NO	YES	NO	NO
6	130369201	130390973	Gm12878 combined segmentation T	rs9375699	130373214	rs6900473	130375810	1	0.882261571916744	-2596	L3MBTL3	NO	NO	NO	YES	NO	NO
6	130373201	130374251	H1hesc combined segmentation T	rs9375699	130373214	rs6900473	130375810	1	0.882261571916744	-2596	L3MBTL3	NO	NO	NO	YES	NO	NO
6	130369369	130397600	Huvec combined segmentation T	rs9375699	130373214	rs6900473	130375810	1	0.882261571916744	-2596	L3MBTL3	NO	NO	NO	YES	NO	NO
6	130369201	130390973	Gm12878 combined segmentation T	rs9375700	130379854	rs6900473	130375810	1	0.981934315267648	4044	L3MBTL3	NO	NO	NO	YES	NO	NO
6	130369369	130397600	Huvec combined segmentation T	rs9375700	130379854	rs6900473	130375810	1	0.981934315267648	4044	L3MBTL3	NO	NO	NO	YES	NO	NO
6	130369201	130390973	Gm12878 combined segmentation T	rs9375701	130384057	rs6900473	130375810	1	0.882261571916744	8247	L3MBTL3	NO	NO	NO	YES	NO	NO
6	130369369	130397600	Huvec combined segmentation T	rs9375701	130384057	rs6900473	130375810	1	0.882261571916744	8247	L3MBTL3	NO	NO	NO	YES	NO	NO
6	130369201	130390973	Gm12878 combined segmentation T	rs9375702	130384187	rs6900473	130375810	1	0.981813819577735	8377	L3MBTL3	NO	NO	NO	YES	NO	NO
6	130369369	130397600	Huvec combined segmentation T	rs9375702	130384187	rs6900473	130375810	1	0.981813819577735	8377	L3MBTL3	NO	NO	NO	YES	NO	NO
6	130369201	130390973	Gm12878 combined segmentation T	rs9375703	130386971	rs6900473	130375810	1	0.882261571916744	11161	L3MBTL3	NO	NO	NO	YES	NO	NO
6	130369369	130397600	Huvec combined segmentation T	rs9375703	130386971	rs6900473	130375810	1	0.882261571916744	11161	L3MBTL3	NO	NO	NO	YES	NO	NO
6	130369201	130390973	Gm12878 combined segmentation T	rs9385532	130371227	rs6900473	130375810	1	0.882261571916744	-4583	L3MBTL3	NO	NO	NO	YES	NO	NO
6	130369369	130397600	Huvec combined segmentation T	rs9385532	130371227	rs6900473	130375810	1	0.882261571916744	-4583	L3MBTL3	NO	NO	NO	YES	NO	NO
6	130369201	130390973	Gm12878 combined segmentation T	rs9385533	130373313	rs6900473	130375810	1	0.872029008911138	-2497	L3MBTL3	NO	NO	NO	YES	NO	NO
6	130373201	130374251	H1hesc combined segmentation T	rs9385533	130373313	rs6900473	130375810	1	0.872029008911138	-2497	L3MBTL3	NO	NO	NO	YES	NO	NO
6	130369369	130397600	Huvec combined segmentation T	rs9385533	130373313	rs6900473	130375810	1	0.872029008911138	-2497	L3MBTL3	NO	NO	NO	YES	NO	NO
6	130354822	130354933	Gm12878 combined segmentation T	rs9388766	130354855	rs6900473	130375810	1	0.905368289637953	-20955	L3MBTL3	NO	NO	NO	YES	NO	NO
6	130351789	130355244	Huvec combined segmentation T	rs9388766	130354855	rs6900473	130375810	1	0.905368289637953	-20955	L3MBTL3	NO	NO	NO	YES	NO	NO
6	130356166	130358414	Huvec combined segmentation T	rs9388767	130357553	rs6900473	130375810	1	0.905368289637953	-18257	L3MBTL3	NO	NO	NO	YES	NO	NO
6	130369201	130390973	Gm12878 combined segmentation T	rs9388768	130374102	rs6900473	130375810	1	0.882261571916744	-1708	L3MBTL3	NO	NO	YES	NO	NO	NO
6	130373201	130374251	H1hesc combined segmentation T	rs9388768	130374102	rs6900473	130375810	1	0.882261571916744	-1708	L3MBTL3	NO	NO	YES	NO	NO	NO
6	130369369	130397600	Huvec combined segmentation T	rs9388768	130374102	rs6900473	130375810	1	0.882261571916744	-1708	L3MBTL3	NO	NO	YES	NO	NO	NO
6	130369201	130390973	Gm12878 combined segmentation T	rs9388769	130379954	rs6900473	130375810	1	0.882261571916744	4144	L3MBTL3	NO	NO	NO	YES	NO	NO
6	130369369	130397600	Huvec combined segmentation T	rs9388769	130379954	rs6900473	130375810	1	0.882261571916744	4144	L3MBTL3	NO	NO	NO	YES	NO	NO
6	130369201	130390973	Gm12878 combined segmentation T	rs9388770	130380877	rs6900473	130375810	1	0.882261571916744	5067	L3MBTL3	NO	NO	NO	YES	NO	NO
6	130369369	130397600	Huvec combined segmentation T	rs9388770	130380877	rs6900473	130375810	1	0.882261571916744	5067	L3MBTL3	NO	NO	NO	YES	NO	NO
6	130351789	130355244	Huvec combined segmentation T	rs9402211	130353612	rs6900473	130375810	0.993340629424194	0.899021805713405	-22198	L3MBTL3	NO	NO	NO	YES	NO	NO
6	130369201	130390973	Gm12878 combined segmentation T	rs9402213	130373188	rs6900473	130375810	0.986948596599246	0.86950349332708	-2622	L3MBTL3	NO	NO	NO	YES	NO	NO
6	130369369	130397600	Huvec combined segmentation T	rs9402213	130373188	rs6900473	130375810	0.986948596599246	0.86950349332708	-2622	L3MBTL3	NO	NO	NO	YES	NO	NO
6	130369201	130390973	Gm12878 combined segmentation T	rs9402214	130387773	rs6900473	130375810	0.993437863459917	0.870720521745413	11963	L3MBTL3	NO	NO	NO	YES	NO	NO
6	130369369	130397600	Huvec combined segmentation T	rs9402214	130387773	rs6900473	130375810	0.993437863459917	0.870720521745413	11963	L3MBTL3	NO	NO	NO	YES	NO	NO
8	128506670	128510908	EncodeFaire.known	rs12156128	128507191	rs6991990	128545383	0.901349218818064	0.802770457338254	-38192	LOC727677	NO	NO	NO	NO	NO	YES
8	128507070	128507249	wgEncodeRegTfbsClustered	rs12156128	128507191	rs6991990	128545383	0.901349218818064	0.802770457338254	-38192	LOC727677	NO	NO	NO	NO	NO	YES
8	128536050	128536606	EncodeFaire.known	rs13264091	128536454	rs6991990	128545383	0.993859688662307	0.947456895661827	-8929	LOC727677	NO	NO	NO	NO	NO	YES
8	128530929	128531354	EncodeFaire.known	rs13265719	128531028	rs6991990	128545383	0.913069418884857	0.809207606340617	-14355	LOC727677	NO	NO	NO	NO	NO	YES
8	128515035	128515270	Gm12878 combined segmentation T	rs34561884	128515051	rs6991990	128545383	0.901349218818064	0.802770457338254	-30332	LOC727677	NO	NO	NO	NO	NO	YES
8	128513877	128514516	EncodeFaire.known	rs35385035	128514398	rs6991990	128545383	0.901349218818064	0.802770457338254	-30985	LOC727677	NO	NO	NO	NO	NO	YES
8	128515035	128515270	Gm12878 combined segmentation T	rs35774048	128515210	rs6991990	128545383	0.901349218818064	0.802770457338254	-30173	LOC727677	NO	NO	NO	NO	NO	YES
8	128523215	128523345	Huvec combined segmentation T	rs35907927	128523285	rs6991990	128545383	0.907732713018871	0.819050202824247	-22098	LOC727677	NO	NO	NO	NO	NO	YES
8	128506670	128510908	EncodeFaire.known	rs55903116	128510211	rs6991990	128545383	0.907746437947978	0.81907497110855	-35172	LOC727677	NO	NO	NO	NO	NO	YES
8	128525624	128525997	Gm12878 combined segmentation T	rs7004374	128525985	rs6991990	128545383	0.901365913778039	0.802800195744843	-19398	LOC727677	NO	NO	NO	NO	NO	YES
17	36078011	36095000	Gm12878 combined segmentation T	rs4794758	36080428	rs7223387	36082473	1	0.993346091047947	-2045	HNF1B	NO	NO	NO	YES	NO	NO
3	170002884	170021823	Gm12878 combined segmentation T	rs75313056	170017609	rs77112641	169962533	0.964160831057495	0.913300248239562	55076	SKIL	NO	NO	NO	YES	NO	NO
3	170011401	170021800	H1hesc combined segmentation T	rs75313056	170017609	rs77112641	169962533	0.964160831057495	0.913300248239562	55076	SKIL	NO	NO	NO	YES	NO	NO
3	170004767	170017745	Huvec combined segmentation T	rs75313056	170017609	rs77112641	169962533	0.964160831057495	0.913300248239562	55076	SKIL	NO	NO	NO	YES	NO	NO
19	17394201	17399677	Gm12878 combined segmentation T	rs11668840	17399625	rs8100241	17392894	1	0.994590119474142	6731	ANKLE1	NO	NO	NO	NO	NO	YES
19	17408995	17412800	Gm12878 combined segmentation T	rs12982058	17409380	rs8100241	17392894	0.988979002872914	0.962262708697299	16486	ABHD8	NO	NO	NO	YES	NO	NO
19	17408998	17412407	H1hesc combined segmentation T	rs12982058	17409380	rs8100241	17392894	0.988979002872914	0.962262708697299	16486	ABHD8	NO	NO	NO	YES	NO	NO
19	17407601	17413400	Huvec combined segmentation T	rs12982058	17409380	rs8100241	17392894	0.988979002872914	0.962262708697299	16486	ABHD8	NO	NO	NO	YES	NO	NO
19	17393615	17394400	Huvec combined segmentation CTCF	rs2363956	17394124	rs8100241	17392894	1	0.937258580730604	1230	ANKLE1	NO	YES	YES	NO	NO	NO
19	17379801	17391799	Gm12878 combined segmentation T	rs4609972	17390917	rs8100241	17392894	0.994529320160261	0.978420519837419	-1977	ANKLE1	YES	NO	NO	YES	NO	NO
19	17389201	17392159	H1hesc combined segmentation T	rs4609972	17390917	rs8100241	17392894	0.994529320160261	0.978420519837419	-1977	ANKLE1	YES	NO	NO	YES	NO	NO
19	17379626	17392200	Huvec combined segmentation T	rs4609972	17390917	rs8100241	17392894	0.994529320160261	0.978420519837419	-1977	ANKLE1	YES	NO	NO	YES	NO	NO
19	17394201	17399677	Gm12878 combined segmentation T	rs748850	17396942	rs8100241	17392894	1	1	4048	ANKLE1	NO	NO	NO	YES	NO	NO
19	17393461	17393710	EncodeDnaseI_withCTCF.known	rs8108174	17393530	rs8100241	17392894	1	1	636	ANKLE1	NO	YES	YES	NO	NO	NO
19	17393159	17393925	EncodeFaire.known	rs8108174	17393530	rs8100241	17392894	1	1	636	ANKLE1	NO	YES	YES	NO	NO	NO
19	17392041	17393613	Gm12878 combined segmentation TSS	rs8108174	17393530	rs8100241	17392894	1	1	636	ANKLE1	NO	YES	YES	NO	NO	NO
19	17393285	17393582	H1hesc combined segmentation TSS	rs8108174	17393530	rs8100241	17392894	1	1	636	ANKLE1	NO	YES	YES	NO	NO	NO
19	17393496	17393614	Huvec combined segmentation TSS	rs8108174	17393530	rs8100241	17392894	1	1	636	ANKLE1	NO	YES	YES	NO	NO	NO
19	17393277	17393776	wgEncodeRegTfbsClustered	rs8108174	17393530	rs8100241	17392894	1	1	636	ANKLE1	NO	YES	YES	NO	NO	NO
8	128485182	128486646	EncodeFaire.known	rs10109700	128485964	rs8180905	128538824	0.946469389813977	0.872610178894143	-52860	LOC727677	NO	NO	NO	YES	NO	NO
8	128531586	128531774	Huvec combined segmentation T	rs11986220	128531689	rs8180905	128538824	0.972590754666195	0.897093811787652	-7135	LOC727677	NO	NO	NO	NO	NO	YES
8	128534705	128534859	Huvec combined segmentation T	rs12545648	128534755	rs8180905	128538824	1	0.987162986045251	-4069	LOC727677	NO	NO	NO	NO	NO	YES
8	128484923	128485152	wgEncodeRegTfbsClustered	rs1447295	128485038	rs8180905	128538824	0.946469389813977	0.872610178894143	-53786	LOC727677	NO	NO	NO	YES	NO	NO
8	128517542	128518188	Gm12878 combined segmentation WE	rs4242382	128517573	rs8180905	128538824	0.959374838637322	0.884706677684598	-21251	LOC727677	NO	NO	NO	NO	NO	YES
8	128540817	128541917	EncodeFaire.known	rs4242386	128541093	rs8180905	128538824	1	0.894094634873323	2269	LOC727677	NO	NO	NO	NO	NO	YES
8	128517601	128518070	EncodeDnaseI_only.known	rs4314621	128518015	rs8180905	128538824	0.972590754666195	0.897093811787652	-20809	LOC727677	NO	NO	NO	NO	NO	YES
8	128517542	128518188	Gm12878 combined segmentation WE	rs4314621	128518015	rs8180905	128538824	0.972590754666195	0.897093811787652	-20809	LOC727677	NO	NO	NO	NO	NO	YES
8	128517894	128518053	Huvec combined segmentation T	rs4314621	128518015	rs8180905	128538824	0.972590754666195	0.897093811787652	-20809	LOC727677	NO	NO	NO	NO	NO	YES
8	128517799	128518098	wgEncodeRegTfbsClustered	rs4314621	128518015	rs8180905	128538824	0.972590754666195	0.897093811787652	-20809	LOC727677	NO	NO	NO	NO	NO	YES
8	128532201	128532400	Huvec combined segmentation T	rs4515512	128532399	rs8180905	128538824	0.972590754666195	0.897093811787652	-6425	LOC727677	NO	NO	NO	NO	NO	YES
8	128483688	128483971	wgEncodeRegTfbsClustered	rs4871801	128483914	rs8180905	128538824	0.946469389813977	0.872610178894143	-54910	LOC727677	NO	NO	NO	YES	NO	NO
8	128485182	128486646	EncodeFaire.known	rs4871802	128485640	rs8180905	128538824	0.946469389813977	0.872610178894143	-53184	LOC727677	NO	NO	NO	YES	NO	NO
8	128483991	128484230	Huvec combined segmentation T	rs6470518	128484181	rs8180905	128538824	0.946469389813977	0.872610178894143	-54643	LOC727677	NO	NO	NO	YES	NO	NO
8	128483991	128484230	Huvec combined segmentation T	rs6470519	128484223	rs8180905	128538824	0.946469389813977	0.872610178894143	-54601	LOC727677	NO	NO	NO	YES	NO	NO
8	128544185	128544893	EncodeFaire.known	rs6470529	128544812	rs8180905	128538824	1	0.974614444314205	5988	LOC727677	NO	NO	NO	NO	NO	YES
8	128544643	128544840	Gm12878 combined segmentation T	rs6470529	128544812	rs8180905	128538824	1	0.974614444314205	5988	LOC727677	NO	NO	NO	NO	NO	YES
8	128519621	128520190	EncodeDnaseI_only.known	rs7812429	128520173	rs8180905	128538824	0.972590754666195	0.897093811787652	-18651	LOC727677	NO	NO	NO	NO	NO	YES
8	128519473	128520713	EncodeFaire.known	rs7812429	128520173	rs8180905	128538824	0.972590754666195	0.897093811787652	-18651	LOC727677	NO	NO	NO	NO	NO	YES
8	128518947	128521847	Huvec combined segmentation enh	rs7812429	128520173	rs8180905	128538824	0.972590754666195	0.897093811787652	-18651	LOC727677	NO	NO	NO	NO	NO	YES
8	128519958	128520337	wgEncodeRegTfbsClustered	rs7812429	128520173	rs8180905	128538824	0.972590754666195	0.897093811787652	-18651	LOC727677	NO	NO	NO	NO	NO	YES
8	128519473	128520713	EncodeFaire.known	rs7812894	128520479	rs8180905	128538824	0.972590754666195	0.897093811787652	-18345	LOC727677	NO	NO	NO	NO	NO	YES
8	128518947	128521847	Huvec combined segmentation enh	rs7812894	128520479	rs8180905	128538824	0.972590754666195	0.897093811787652	-18345	LOC727677	NO	NO	NO	NO	NO	YES
8	128520919	128523102	EncodeFaire.known	rs7814837	128522202	rs8180905	128538824	0.972590754666195	0.897093811787652	-16622	LOC727677	NO	NO	NO	NO	NO	YES
8	128489071	128489413	Gm12878 combined segmentation T	rs7826179	128489199	rs8180905	128538824	0.946469389813977	0.872610178894143	-49625	LOC727677	NO	NO	NO	YES	NO	NO
8	128518797	128519188	EncodeFaire.known	rs9297759	128519171	rs8180905	128538824	0.972590754666195	0.897093811787652	-19653	LOC727677	NO	NO	NO	NO	NO	YES
8	128518947	128521847	Huvec combined segmentation enh	rs9297759	128519171	rs8180905	128538824	0.972590754666195	0.897093811787652	-19653	LOC727677	NO	NO	NO	NO	NO	YES
8	128494439	128494842	EncodeFaire.known	rs9643226	128494481	rs8180905	128538824	0.959374838637322	0.884706677684598	-44343	LOC727677	YES	NO	NO	NO	NO	YES
19	41984836	41986602	EncodeFaire.known	rs11672691	41985587	rs887391	41985624	1	0.867990247300592	-37	LOC100505495	NO	NO	NO	YES	NO	NO
19	41984061	41986200	Huvec combined segmentation TSS	rs11672691	41985587	rs887391	41985624	1	0.867990247300592	-37	LOC100505495	NO	NO	NO	YES	NO	NO
19	41985565	41985768	wgEncodeRegTfbsClustered	rs11672691	41985587	rs887391	41985624	1	0.867990247300592	-37	LOC100505495	NO	NO	NO	YES	NO	NO
19	41984836	41986602	EncodeFaire.known	rs2079811	41986217	rs887391	41985624	1	0.862086293536649	593	LOC100505495	NO	NO	NO	YES	NO	NO
19	41986201	41986857	Huvec combined segmentation enh	rs2079811	41986217	rs887391	41985624	1	0.862086293536649	593	LOC100505495	NO	NO	NO	YES	NO	NO
19	41985915	41986234	wgEncodeRegTfbsClustered	rs2079811	41986217	rs887391	41985624	1	0.862086293536649	593	LOC100505495	NO	NO	NO	YES	NO	NO
19	41984836	41986602	EncodeFaire.known	rs2316974	41986536	rs887391	41985624	1	0.862086293536649	912	LOC100505495	NO	NO	NO	YES	NO	NO
19	41986201	41986857	Huvec combined segmentation enh	rs2316974	41986536	rs887391	41985624	1	0.862086293536649	912	LOC100505495	NO	NO	NO	YES	NO	NO
19	41985821	41986070	EncodeDnaseI_only.known	rs74738513	41985931	rs887391	41985624	1	0.873954139681429	307	LOC100505495	NO	NO	NO	YES	NO	NO
19	41984836	41986602	EncodeFaire.known	rs74738513	41985931	rs887391	41985624	1	0.873954139681429	307	LOC100505495	NO	NO	NO	YES	NO	NO
19	41984061	41986200	Huvec combined segmentation TSS	rs74738513	41985931	rs887391	41985624	1	0.873954139681429	307	LOC100505495	NO	NO	NO	YES	NO	NO
19	41985808	41986151	wgEncodeRegTfbsClustered	rs74738513	41985931	rs887391	41985624	1	0.873954139681429	307	LOC100505495	NO	NO	NO	YES	NO	NO
19	41984836	41986602	EncodeFaire.known	rs887392	41985802	rs887391	41985624	1	0.810580678599855	178	LOC100505495	NO	NO	NO	YES	NO	NO
19	41984061	41986200	Huvec combined segmentation TSS	rs887392	41985802	rs887391	41985624	1	0.810580678599855	178	LOC100505495	NO	NO	NO	YES	NO	NO

## Sheet: ASSET SNPs
Chromosome	Location	SNP name	Overlap with biofeatures																								Nearest TSS, Gene Symbol	Promoter	5' UTR	Exon	Intron	3' UTR	Intergenic
			Gm12878 combined segmentation CTCF	Gm12878 combined segmentation enh	Gm12878 combined segmentation PF	Gm12878 combined segmentation T	Gm12878 combined segmentation TSS	Gm12878 combined segmentation WE	H1hesc combined segmentation CTCF	H1hesc combined segmentation enh	H1hesc combined segmentation PF	H1hesc combined segmentation T	H1hesc combined segmentation TSS	H1hesc combined segmentation WE	Huvec combined segmentation CTCF	Huvec combined segmentation enh	Huvec combined segmentation PF	Huvec combined segmentation T	Huvec combined segmentation TSS	Huvec combined segmentation WE	wgEncodeRegTfbsClustered	CTCF_only.known	EncodeDnaseI_only.known	EncodeDnaseI_withCTCF.known	EncodeFaire.known	knownGene.Promoters.known
2	217879863	rs10932692	NO	NO	NO	NO	NO	NO	NO	NO	NO	NO	NO	NO	NO	NO	NO	NO	NO	NO	NO	NO	NO	NO	NO	NO	TNP1	NO	NO	NO	NO	NO	YES
2	217936015	rs12622536	NO	NO	NO	NO	NO	NO	NO	NO	NO	NO	NO	NO	NO	NO	NO	NO	NO	NO	NO	NO	NO	NO	NO	NO	TNP1	NO	NO	NO	NO	NO	YES
2	217915414	rs12694403	NO	NO	NO	NO	NO	NO	NO	NO	NO	NO	NO	NO	NO	NO	NO	NO	NO	NO	NO	NO	NO	NO	NO	NO	TNP1	NO	NO	NO	NO	NO	YES
2	217938177	rs13011060	NO	NO	NO	NO	NO	NO	NO	NO	NO	NO	NO	NO	NO	NO	NO	NO	NO	NO	NO	NO	NO	NO	NO	NO	TNP1	NO	NO	NO	NO	NO	YES
2	217920769	rs4442975	NO	NO	NO	NO	NO	NO	NO	NO	NO	NO	NO	NO	NO	NO	NO	NO	NO	NO	NO	NO	NO	NO	NO	NO	TNP1	NO	NO	NO	NO	NO	YES
3	170135700	rs10804842	NO	NO	NO	NO	NO	NO	NO	NO	NO	NO	NO	NO	NO	NO	NO	YES	NO	NO	NO	NO	NO	NO	NO	YES	CLDN11	YES	NO	NO	NO	NO	YES
3	170122676	rs12486850	NO	NO	NO	NO	NO	NO	NO	NO	NO	NO	NO	NO	NO	NO	NO	NO	NO	NO	NO	NO	NO	NO	NO	NO	CLDN11	NO	NO	NO	NO	NO	YES
3	169891246	rs17236830	NO	NO	NO	YES	NO	NO	NO	NO	NO	YES	NO	NO	NO	NO	NO	YES	NO	NO	NO	NO	NO	NO	NO	NO	PHC3	NO	NO	NO	YES	NO	NO
3	127892037	rs2999052	NO	NO	NO	YES	NO	NO	NO	NO	NO	NO	NO	NO	NO	NO	NO	YES	NO	NO	NO	NO	NO	NO	NO	NO	EEFSEC	NO	NO	NO	YES	NO	NO
3	170121598	rs55953261	NO	NO	NO	NO	NO	NO	NO	NO	NO	NO	NO	NO	NO	NO	NO	YES	NO	NO	NO	NO	NO	NO	NO	NO	CLDN11	NO	NO	NO	NO	NO	YES
3	169988286	rs56257047	NO	NO	NO	YES	NO	NO	NO	NO	NO	YES	NO	NO	NO	NO	NO	YES	NO	NO	NO	NO	NO	NO	NO	NO	PRKCI	NO	NO	YES	NO	NO	NO
3	170083629	rs61436251	NO	NO	NO	YES	NO	NO	YES	NO	NO	NO	NO	NO	NO	NO	NO	YES	NO	NO	NO	NO	NO	NO	NO	NO	SKIL	NO	NO	NO	YES	NO	NO
3	170063227	rs75982374	NO	NO	NO	NO	NO	NO	NO	NO	NO	NO	NO	NO	NO	NO	NO	NO	NO	NO	NO	NO	NO	NO	NO	NO	SKIL	NO	NO	NO	NO	NO	YES
3	170127536	rs77085460	NO	NO	NO	NO	NO	NO	NO	NO	NO	NO	NO	NO	NO	NO	NO	YES	NO	NO	NO	NO	NO	NO	NO	NO	CLDN11	NO	NO	NO	NO	NO	YES
3	169962533	rs77112641	NO	NO	NO	NO	NO	NO	NO	NO	NO	YES	NO	NO	NO	NO	NO	NO	NO	NO	YES	NO	NO	NO	NO	NO	PRKCI	YES	NO	NO	YES	NO	NO
4	106063987	rs12647922	NO	NO	NO	NO	NO	NO	NO	NO	NO	NO	NO	NO	NO	NO	NO	NO	NO	NO	NO	NO	NO	NO	NO	NO	TET2	NO	NO	NO	NO	NO	YES
4	106150555	rs143875052	NO	NO	NO	YES	NO	NO	NO	NO	NO	NO	NO	NO	NO	NO	NO	YES	NO	NO	NO	NO	NO	NO	NO	NO	TET2	NO	NO	NO	YES	NO	NO
4	106137033	rs2047409	NO	YES	NO	NO	NO	NO	NO	NO	NO	NO	NO	NO	NO	NO	NO	NO	NO	NO	YES	NO	YES	NO	NO	NO	TET2	NO	NO	NO	YES	NO	NO
6	31322790	rs2523607	NO	NO	NO	NO	YES	NO	NO	NO	NO	YES	NO	NO	NO	NO	NO	NO	NO	NO	YES	NO	NO	NO	NO	NO	MICA	NO	NO	NO	YES	NO	NO
6	31082476	rs3095300	NO	NO	NO	NO	NO	NO	NO	NO	NO	NO	NO	YES	NO	NO	NO	NO	YES	NO	YES	NO	YES	NO	YES	YES	PSORS1C1	YES	NO	NO	NO	NO	YES
6	31727897	rs3115672	NO	NO	NO	YES	NO	NO	NO	NO	NO	YES	NO	NO	NO	NO	NO	YES	NO	NO	NO	NO	NO	NO	NO	NO	SAPCD1	NO	YES	YES	NO	NO	NO
6	130349119	rs6569648	NO	NO	NO	NO	NO	NO	NO	NO	NO	NO	NO	NO	NO	NO	NO	YES	NO	NO	NO	NO	NO	NO	YES	NO	L3MBTL3	NO	NO	NO	YES	NO	NO
6	31826705	rs67682613	NO	NO	NO	YES	NO	NO	NO	NO	NO	YES	NO	NO	NO	NO	NO	YES	NO	NO	YES	NO	NO	NO	NO	NO	NEU1	NO	NO	NO	NO	NO	YES
6	130375810	rs6900473	NO	NO	NO	YES	NO	NO	NO	NO	NO	NO	NO	NO	NO	NO	NO	YES	NO	NO	NO	NO	NO	NO	NO	NO	L3MBTL3	NO	NO	NO	YES	NO	NO
8	23497421	rs13265582	NO	NO	NO	NO	NO	NO	NO	NO	NO	NO	NO	NO	NO	NO	NO	NO	NO	NO	YES	NO	NO	NO	NO	NO	NKX3-1	NO	NO	NO	NO	NO	YES
8	23507360	rs189897331	NO	NO	NO	NO	NO	NO	NO	NO	NO	YES	NO	NO	NO	NO	NO	NO	NO	NO	NO	NO	NO	NO	NO	NO	NKX3-1	NO	NO	NO	NO	NO	YES
13	32839990	rs56404467	NO	NO	NO	NO	NO	NO	NO	NO	NO	NO	NO	NO	NO	NO	NO	NO	NO	NO	NO	NO	NO	NO	NO	NO	ZAR1L	NO	NO	NO	YES	NO	NO
17	36084202	rs2107132	NO	NO	NO	YES	NO	NO	NO	NO	NO	NO	NO	NO	NO	NO	NO	NO	NO	NO	NO	NO	NO	NO	NO	NO	HNF1B	NO	NO	NO	YES	NO	NO
17	36082473	rs7223387	NO	NO	NO	YES	NO	NO	NO	NO	NO	NO	NO	NO	NO	NO	NO	NO	NO	NO	NO	NO	NO	NO	NO	NO	HNF1B	NO	NO	NO	YES	NO	NO
19	17384003	rs10402468	NO	NO	NO	YES	NO	NO	NO	NO	NO	YES	NO	NO	NO	NO	NO	YES	NO	NO	NO	NO	NO	NO	NO	NO	BABAM1	NO	NO	NO	YES	NO	NO
19	38754239	rs11083450	NO	NO	NO	NO	NO	NO	NO	NO	NO	NO	NO	NO	NO	NO	NO	NO	NO	NO	NO	NO	NO	NO	NO	YES	SPINT2	YES	NO	NO	NO	NO	YES
19	17398085	rs111961716	NO	NO	NO	YES	NO	NO	NO	NO	NO	NO	NO	NO	NO	NO	NO	NO	NO	NO	NO	NO	NO	NO	NO	NO	ANKLE1	NO	NO	NO	NO	YES	NO
19	17382990	rs35604430	NO	NO	NO	YES	NO	NO	NO	NO	NO	YES	NO	NO	NO	NO	NO	YES	NO	NO	NO	NO	NO	NO	NO	NO	BABAM1	NO	NO	NO	YES	NO	NO
19	17384267	rs3745185	NO	NO	NO	YES	NO	NO	NO	NO	NO	YES	NO	NO	NO	NO	NO	YES	NO	NO	NO	NO	NO	NO	NO	NO	BABAM1	NO	NO	NO	YES	NO	NO
19	17392894	rs8100241	NO	NO	NO	NO	YES	NO	NO	YES	NO	NO	NO	NO	NO	YES	NO	NO	NO	NO	YES	NO	NO	NO	YES	NO	ANKLE1	NO	YES	YES	NO	NO	NO
19	41985624	rs887391	NO	NO	NO	NO	NO	NO	NO	NO	NO	NO	NO	NO	NO	NO	NO	NO	YES	NO	YES	NO	NO	NO	YES	NO	LOC100505495	NO	NO	NO	YES	NO	NO
